# Supplementary material for: Divergent synthesis of 4-amino indoles with free amine groups via tandem reaction of 2-alkynylanilines
Source: Royal Society of Chemistry journal article supplement (doi:10.1039/d2qo00675h), 2022-01-01
Supplement: d2qo00675h1.pdf [file d2qo00675h1.pdf]

# Divergent Synthesis of 4-Amino Indoles with Free Amine Groups via Tandem Reaction of 2- Alkynylanilines

Xiaohua Li, Qiuqin He\*, Renhua Fan\*

\*Corresponding author: Email: [rhfan@fudan.edu.cn](mailto:rhfan@fudan.edu.cn)

## Supplementary Information

### Content

|        |                                                           |
|--------|-----------------------------------------------------------|
| S2     | General Information                                       |
| S2-S3  | Evaluation of Conditions                                  |
| S3-25  | Representative Procedure and Characterization of Products |
| S26-74 | $^1\text{H}$ NMR and $^{13}\text{C}$ NMR                  |

## Supplementary Methods

### 1. General Information

All reactions were performed in a 25 mL of Sealed tubes under air atmosphere. Flash column chromatography was performed using silica gel (60-Å pore size, 32–63 μm, standard grade). Analytical thin-layer chromatography was performed using glass plates pre-coated with 0.25 mm 230–400 mesh silica gel impregnated with a fluorescent indicator (254 nm). Thin layer chromatography plates were visualized by exposure to ultraviolet light. Organic solutions were concentrated on rotary evaporators at ~20 Torr (house vacuum) at 35–40 °C. Commercial reagents and solvents were used as received. Nuclear magnetic resonance (NMR) spectra are recorded in parts per million from internal tetramethylsilane on the δ scale. High Resolution Mass spectra was recorded by Bruker MicroTOF II (ESI<sup>+</sup>).

### 2. Evaluation of Conditions

Table S1. Evaluation of Conditions

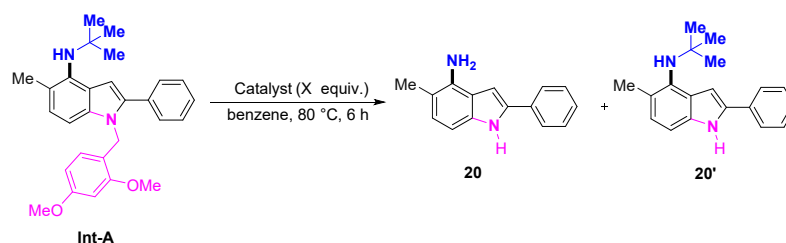

| Entry | Catalyst             | Equiv of Catalyst | Yield of 20 | Yield of 20' |
|-------|----------------------|-------------------|-------------|--------------|
| 1     | ZnCl <sub>2</sub>    | 2.0               | 0           | 82           |
| 2     | In(OTf) <sub>3</sub> | 2.0               | 0           | 79           |
| 3     | Sc(OTf) <sub>3</sub> | 2.0               | 0           | 79           |
| 4     | Bi(OTf) <sub>3</sub> | 2.0               | 0           | 50           |

|    |                                    |      |    |   |
|----|------------------------------------|------|----|---|
| 5  | AlCl <sub>3</sub>                  | 5.0  | 91 | 0 |
| 6  | AlBr <sub>3</sub>                  | 5.0  | 51 | 0 |
| 7  | BF <sub>3</sub> ·Et <sub>2</sub> O | 10.0 | 90 | 0 |
| 8  | SnCl <sub>4</sub>                  | 5.0  | 63 | 0 |
| 9  | FeCl <sub>3</sub>                  | 5.0  | 0  | 0 |
| 10 | Cu(OTf) <sub>2</sub>               | 2.0  | 0  | 0 |
| 11 | Yb(OTf) <sub>3</sub>               | 2.0  | 0  | 0 |
| 12 | TsOH·H <sub>2</sub> O              | 5.0  | 49 | 0 |
| 13 | CF <sub>3</sub> COOH               | 5.0  | 0  | 0 |

**Table S2. Evaluation of Deprotection Conditions**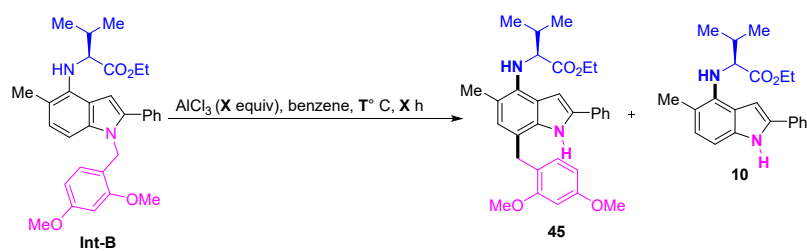

| Entry | Equiv. of $\text{AlCl}_3$ | $T/^\circ\text{C}$ | X/h | Yield of 45 | Yield of 10 |
|-------|---------------------------|--------------------|-----|-------------|-------------|
| 1     | 5.0                       | 40                 | 12  | 0           | 80          |
| 2     | 2.0                       | 40                 | 12  | 45          | 33          |
| 3     | 2.0                       | 40                 | 20  | 60          | 20          |
| 4     | 2.0                       | 60                 | 20  | 40          | 33          |
| 5     | 3.0                       | 40                 | 20  | 52          | 35          |
| 6     | 4.0                       | 40                 | 12  | 20          | 56          |
| 7     | 4.0                       | 80                 | 6   | 0           | 70          |

### 3. Representative Procedure and Characterization of Products

#### 3.1 Representative Procedure

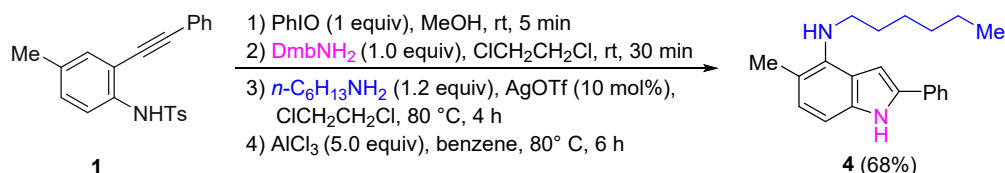

PhIO (0.1 mmol) was added to a solution of compound **1** (0.1 mmol) in MeOH (2.0 mL) at 25 °C. After 5 min, the reaction mixture was concentrated *in vacuo*. The resulting crude product was dissolved in 1,2-dichloroethane (2.0 mL), (2,4-dimethoxyphenyl)methanamine (DmbNH<sub>2</sub>) (0.1 mmol) was added and the resulting mixture was stirred at the room temperature for 30 min. Treating with 1.2 equivalents of hexan-1-amine (*n*-C<sub>6</sub>H<sub>13</sub>NH<sub>2</sub>) in the presence of 10 mol% of AgOTf in 1,2-dichloromethane at 80 °C for 4 hours led to the formation of 4-hexylamino indole. Then the reaction mixture was filtered through a short silica gel column to remove TsNH<sub>2</sub> and AgOTf (eluent: petroleum ether/ ethyl acetate 10:1). Next, The resulting crude product that was concentrated *in vacuo* was dissolved in Benzene (2 mL) and added anhydrous AlCl<sub>3</sub> (0.5 mmol). The solution was stirred at 80 °C for another 6 h. After the intermediate was completely consumed (monitored by TLC analysis), the mixture was cooled to the room temperature, the reaction was quenched by the addition of H<sub>2</sub>O (5 mL) and the organic compounds were extracted with ethyl acetate (5 mL ×3) for three times. The organic layers were washed with brine (10 mL ×2), dried over anhydrous Na<sub>2</sub>SO<sub>4</sub>, and the solvent was removed under reduced pressure. The obtained residue was purified by flash column chromatography on silica gel (eluent: petroleum ether/ ethyl acetate 10:1) to furnish the desired compound **4** (20.8 mg, 68% yield).

#### 3.2 General procedure for the synthesis of the racemic compound 49

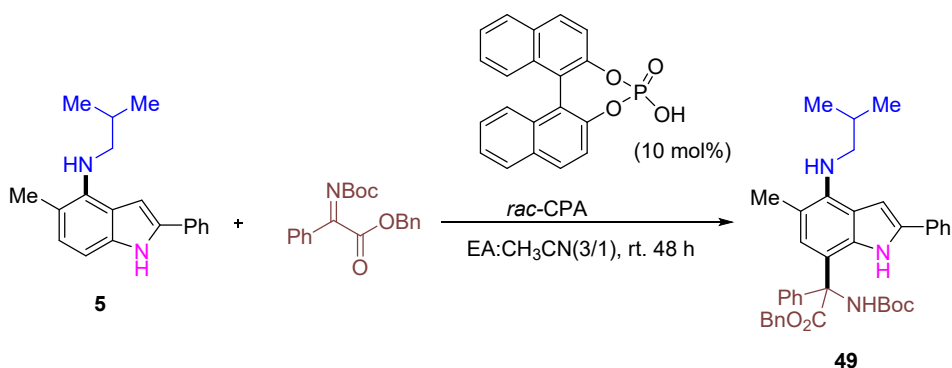

*N*-isobutyl-5-methyl-2-phenyl-1*H*-indol-4-amine **5** (0.1 mmol, 1.0 equiv.) was added to a mixture of solution catalyst (*rac*)-CPA (0.01 mmol, 0.1 equiv.) and benzyl (*E*)-2-((*tert*-butoxycarbonyl)imino)-2-phenylacetate (0.15 mmol, 1.5 equiv.) in EA/CH<sub>3</sub>CN (1.5 mL : 0.5 mL) at room temperature for 48 h. After completion (monitored by TLC), the mixture was directly purified by silica gel column chromatography (eluent: dichloromethane / petroleum ether = 4:1) to afford the compound **49**.

#### References:

- (1) Y. Zhao, L. Cai, T. Huang, S. Meng, A. S. C. Chan and J Zhao. *Adv. Synth. Catal.*, 2020, **362**, 1309.

### 3.3 General procedure for the synthesis of the racemic compound **50**

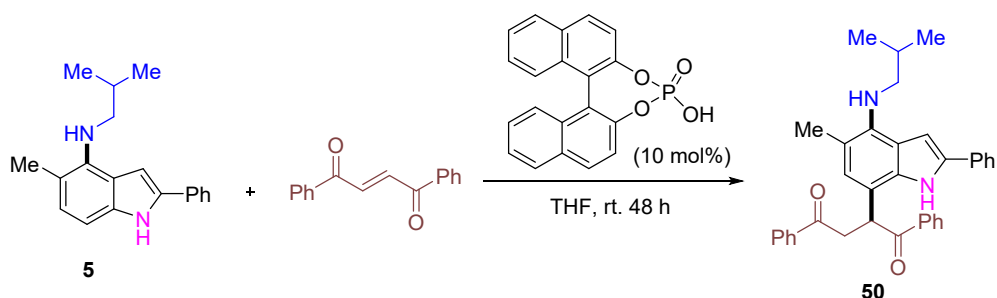

The (*E*)-1,4-diphenylbut-2-ene-1,4-dione (0.12 mmol, 1.2 equiv.) was added to a solution of catalyst (*rac*)-CPA (0.01 mmol, 0.1 equiv.) and *N*-isobutyl-5-methyl-2-phenyl-1*H*-indol-4-amine **5** (0.1 mmol, 1.0 equiv.) in THF (2 mL) at room temperature for 48 h. After completion (monitored by TLC), the mixture was concentrated and the residue was purified by flash chromatography on silica gel (eluent: petroleum ether /

ethyl acetate = 5:1) to afford the compound **50**.

#### References:

- (2) T. Huang, Y. Zhao, S. Meng, A. S. C. Chan and J. Zhao. *Adv. Synth. Catal.*, 2019, **361**, 3632.

### 3.4 General procedure for the synthesis of the compound **51**

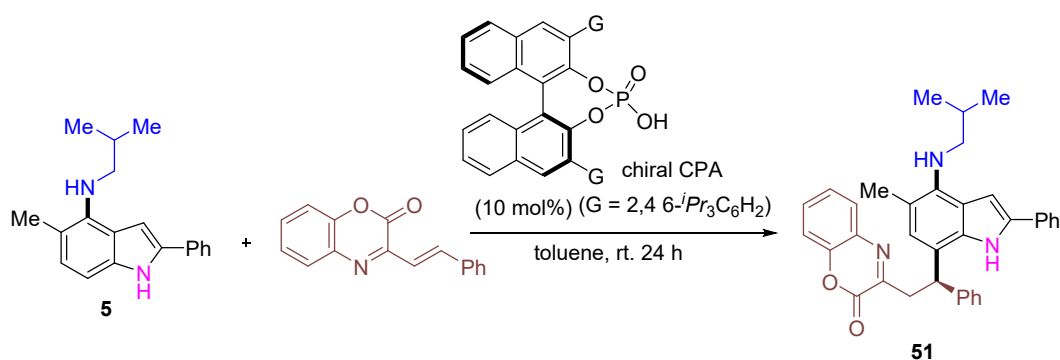

The (*E*)-3-styryl-2*H*-benzo[*b*] [1,4] oxazin-2-one (0.12 mmol, 1.2 equiv.) was added to a solution of catalyst (S) or (R)-CPA (0.01 mmol, 0.1 equiv.) and *N*-isobutyl-5-methyl-2-phenyl-1*H*-indol-4-amine **5** (0.1 mmol, 1.0 equiv.) in dry toluene (2 mL) at room temperature for 24 h. After completion (monitored by TLC), the mixture was concentrated and the residue was purified by flash chromatography on silica gel (eluent : petroleum ether / ethyl acetate = 5:1) to afford the title compound **51**.

### 3.5 General procedure for the synthesis of the racemic compounds **51**

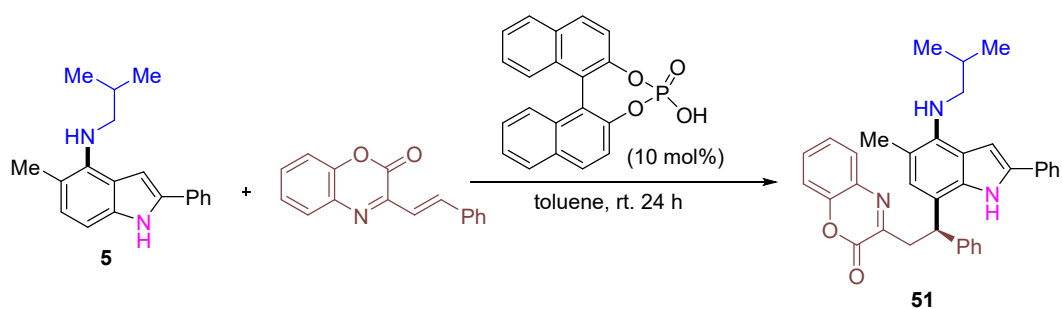

The (*E*)-3-styryl-2*H*-benzo[*b*][1,4]oxazin-2-one (0.12 mmol, 1.2 equiv.) was added to a solution of catalyst (*rac*)-CPA (0.01 mmol, 0.1 equiv.) and *N*-isobutyl-5-methyl-2-phenyl-1*H*-indol-4-amine **5** (0.1 mmol, 1.0 equiv.) in dry toluene (2 mL) at room temperature for 24 h. After completion (monitored by TLC), the mixture was concentrated and the residue was purified by flash chromatography on silica gel (eluent : petroleum ether / ethyl acetate = 5:1) to afford the title compound **51**.

### References:

- (3) W. Xun, B. Xu, B. Chen, S. Meng, A. S. C. Chan, F. G. Qiu and J. Zhao, *Org. Lett.*, 2018, **20**, 590.

### 3.6 General procedure for the synthesis of the compound **52**

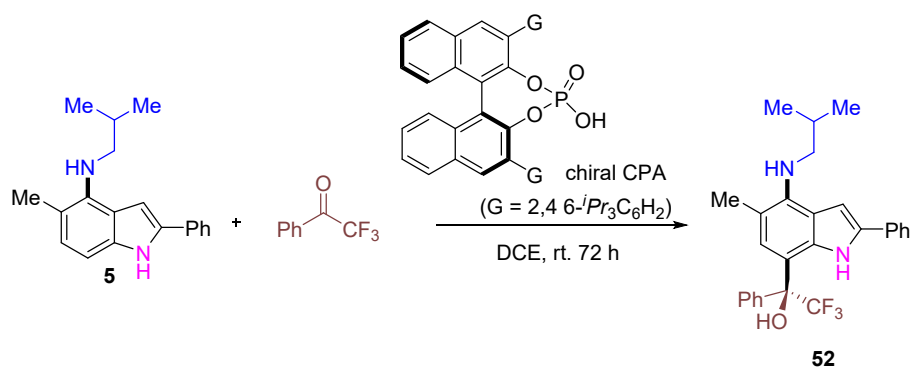

2,2,2-trifluoro-1-phenylethan-1-one (0.15 mmol, 1.5 equiv.) was added to a solution of catalyst (*S*) or (*R*)-CPA (0.01 mmol, 0.1 equiv.) and *N*-isobutyl-5-methyl-2-phenyl-1*H*-indol-4-amine **5** (0.1 mmol, 1.0 equiv.) in DCE (2 mL) at room temperature for 72 h. After completion (monitored by TLC), the mixture was concentrated and the residue was purified by flash chromatography on silica gel (eluent : dichloromethane /



petroleum ether = 2:1) to afford the compound **52**.

### 3.7 General procedure for the synthesis of the racemic compound **52**

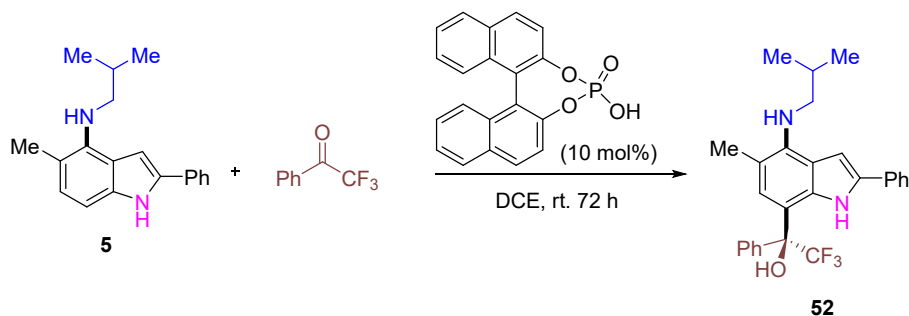

2,2,2-trifluoro-1-phenylethan-1-one (0.15 mmol, 1.5 equiv.) was added to a solution of catalyst (*rac*)-CPA (0.01 mmol, 0.1 equiv.) and *N*-isobutyl-5-methyl-2-phenyl-1*H*-indol-4-amine **5** (0.1 mmol, 1.0 equiv.) in DCE (2 mL) at room temperature for 72 h. After completion (monitored by TLC), the mixture was concentrated and the residue was purified by flash chromatography on silica gel (eluent : dichloromethane / petroleum ether = 2:1) to afford the compound **52**.

### References:

- (4) L. Cai, Y. Zhao, T. Huang, S. Meng, X. Jia, A. S. C. Chan and J. Zhao, *Org. Lett.*, 2019, **21**, 3538.

### 3.8 Characterization of Products

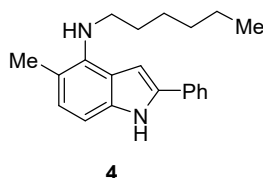

*N*-hexyl-5-methyl-2-phenyl-1*H*-indol-4-amine (**4**) (eluent: petroleum ether/ethyl acetate 10:1), 20.8 mg, 68% yield; green solid, m.p. : 81-82 °C; <sup>1</sup>H NMR (400 MHz,

CDCl<sub>3</sub>) δ 8.22 (br s, 1H), 7.61 (d, *J* = 7.3 Hz, 2H), 7.39 (t, *J* = 7.7 Hz, 2H), 7.26 (t, *J* = 7.4 Hz, 1H), 6.92 (d, *J* = 8.1 Hz, 1H), 6.91 (s, 1H), 6.79 (d, *J* = 8.1 Hz, 1H), 3.54 (t, *J* = 7.2 Hz, 2H), 3.02 (br s, 1H), 2.27 (s, 3H), 1.71 – 1.63 (m, 2H), 1.45 – 1.41 (m, 2H), 1.33 – 1.31 (m, 4H), 0.89 (t, *J* = 6.9 Hz, 3H). <sup>13</sup>C NMR (100 MHz, CDCl<sub>3</sub>) δ 139.7, 137.8, 135.9, 132.6, 128.9, 127.2, 125.9, 124.8, 119.8, 113.6, 101.9, 98.8, 48.0, 31.7, 31.1, 26.8, 22.6, 17.6, 14.0. HRMS (ESI-TOF) *m/z*: [M+H]<sup>+</sup> Calcd for C<sub>21</sub>H<sub>27</sub>N<sub>2</sub> 307.2169; Found : 307.2182.

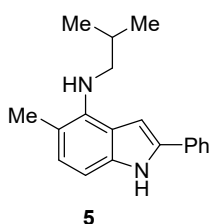

***N*-isobutyl-5-methyl-2-phenyl-1*H*-indol-4-amine (5)** (eluent: petroleum ether/ethyl acetate 10:1), 17.5 mg, 63% yield; green solid, m.p. : 134-135 °C; <sup>1</sup>H NMR (400 MHz, CDCl<sub>3</sub>) δ 8.19 (br s, 1H), 7.61 (d, *J* = 7.3 Hz, 2H), 7.40 (t, *J* = 7.7 Hz, 2H), 7.27 (t, *J* = 7.4 Hz, 1H), 6.91 (d, *J* = 8.2 Hz, 1H), 6.90 (s, 1H), 6.79 (d, *J* = 8.1 Hz, 1H), 3.37 (d, *J* = 6.7 Hz, 2H), 2.28 (s, 3H), 2.00 – 1.88 (m, 1H), 1.03 (d, *J* = 6.7 Hz, 6H). <sup>13</sup>C NMR (100 MHz, CDCl<sub>3</sub>) δ 139.7, 137.8, 135.9, 132.6, 128.9, 127.2, 126.0, 124.8, 119.6, 113.3, 101.7, 98.8, 55.6, 29.4, 20.5, 17.6. HRMS (ESI-TOF) *m/z*: [M+H]<sup>+</sup> Calcd for C<sub>19</sub>H<sub>23</sub>N<sub>2</sub> 279.1856; Found : 279.1876.

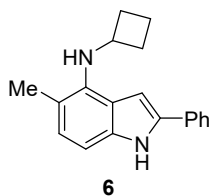

***N*-cyclobutyl-5-methyl-2-phenyl-1*H*-indol-4-amine (6)** (eluent: petroleum ether/ethyl acetate 10:1), 18.2 mg, 66% yield; green oil; <sup>1</sup>H NMR (400 MHz, CDCl<sub>3</sub>) δ 8.20 (br s, 1H), 7.63 (d, *J* = 7.4 Hz, 2H), 7.41 (t, *J* = 7.7 Hz, 2H), 7.28 (t, *J* = 7.4 Hz, 1H), 6.92 (d, *J* = 8.1 Hz, 1H), 6.88 (d, *J* = 1.5 Hz, 1H), 6.80 (d, *J* = 8.1 Hz, 1H), 4.39

(p,  $J = 7.7$  Hz, 1H), 3.14 (br s, 1H), 2.49 – 2.42 (m, 2H), 2.28 (s, 3H), 1.99 – 1.89 (m, 2H), 1.81 – 1.65 (m, 2H).  $^{13}\text{C}$  NMR (100 MHz,  $\text{CDCl}_3$ )  $\delta$  138.5, 137.6, 136.0, 132.6, 128.9, 127.2, 125.8, 124.8, 119.6, 113.4, 101.9, 98.5, 52.4, 33.4, 17.7, 14.3. HRMS (ESI-TOF)  $m/z$ :  $[\text{M}+\text{H}]^+$  Calcd for  $\text{C}_{19}\text{H}_{21}\text{N}_2$  277.1699; Found : 277.1697.

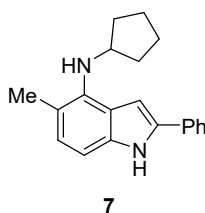

***N*-cyclopentyl-5-methyl-2-phenyl-1*H*-indol-4-amine (7)** (eluent: petroleum ether/ethyl acetate 10:1), 21.5 mg, 74% yield; green oil;  $^1\text{H}$  NMR (400 MHz,  $\text{CDCl}_3$ )  $\delta$  8.21 (br s, 1H), 7.63 (d,  $J = 7.3$  Hz, 2H), 7.41 (t,  $J = 7.7$  Hz, 2H), 7.28 (t,  $J = 7.4$  Hz, 1H), 6.92 (d,  $J = 8.1$  Hz, 1H), 6.90 (d,  $J = 1.5$  Hz, 1H), 6.82 (d,  $J = 8.1$  Hz, 1H), 4.35 (p,  $J = 5.7$  Hz, 1H), 2.78 (br s, 1H), 2.27 (s, 3H), 2.04 – 1.96 (m, 2H), 1.77 – 1.58 (m, 2H), 1.68 – 1.55 (m, 4H).  $^{13}\text{C}$  NMR (100 MHz,  $\text{CDCl}_3$ )  $\delta$  139.2, 137.6, 135.9, 132.6, 128.9, 127.2, 125.9, 124.8, 120.1, 114.1, 102.0, 98.8, 58.1, 34.5, 23.8, 17.8. HRMS (ESI-TOF)  $m/z$ :  $[\text{M}+\text{H}]^+$  Calcd for  $\text{C}_{20}\text{H}_{23}\text{N}_2$  291.1856; Found : 291.1866.

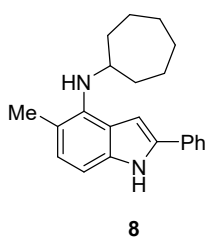

***N*-cycloheptyl-5-methyl-2-phenyl-1*H*-indol-4-amine (8)** (eluent: petroleum ether/ethyl acetate 10:1), 20.0 mg, 63% yield; green oil;  $^1\text{H}$  NMR (400 MHz,  $\text{CDCl}_3$ )  $\delta$  8.21 (br s, 1H), 7.64 (d,  $J = 7.4$  Hz, 2H), 7.42 (t,  $J = 7.7$  Hz, 2H), 7.28 (t,  $J = 7.4$  Hz, 1H), 6.93 (d,  $J = 8.1$  Hz, 1H), 6.84 (d,  $J = 8.3$  Hz, 1H), 6.82 (s, 1H), 3.92 – 3.86 (m, 1H), 2.74 (br s, 1H), 2.28 (s, 3H), 2.13 – 2.08 (m, 2H), 1.71 – 1.42 (m, 10H).  $^{13}\text{C}$  NMR (100 MHz,  $\text{CDCl}_3$ )  $\delta$  138.7, 137.4, 136.0, 132.6, 128.9, 127.2, 125.9, 124.8, 120.9,

115.0, 102.5, 98.5, 57.3, 36.2, 28.4, 24.0, 17.8. HRMS (ESI-TOF)  $m/z$ :  $[M+H]^+$  Calcd for  $C_{22}H_{27}N_2$  319.2169; Found : 319.2189.

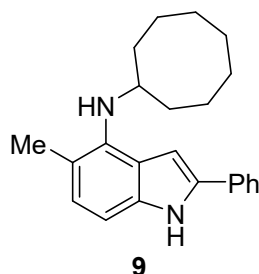

***N*-cyclooctyl-5-methyl-2-phenyl-1*H*-indol-4-amine (9)** (eluent: petroleum ether/ethyl acetate 10:1), 14.9 mg, 45% yield; green oil;  $^1H$  NMR (400 MHz,  $CDCl_3$ )  $\delta$  8.21 (br s, 1H), 7.64 (d,  $J = 7.9$  Hz, 2H), 7.42 (t,  $J = 7.7$  Hz, 2H), 7.29 (t,  $J = 7.4$  Hz, 1H), 6.93 (d,  $J = 8.1$  Hz, 1H), 6.84 (d,  $J = 8.1$  Hz, 1H), 6.82 (s, 1H), 3.97 – 3.87 (m, 1H), 2.28 (s, 3H), 2.03 – 1.97 (m, 2H), 1.72 – 1.55 (m, 12H).  $^{13}C$  NMR (100 MHz,  $CDCl_3$ )  $\delta$  138.7, 137.4, 136.0, 132.7, 128.9, 127.2, 125.9, 124.9, 121.0, 115.2, 102.5, 98.5, 56.2, 33.2, 27.5, 25.7, 23.8, 17.8. HRMS (ESI-TOF)  $m/z$ :  $[M+H]^+$  Calcd for  $C_{23}H_{29}N_2$  333.2325; Found : 333.2337.

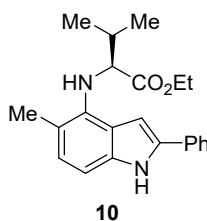

**Ethyl (5-methyl-2-phenyl-1*H*-indol-4-yl)-*L*-valinate (10)** (eluent: petroleum ether/ethyl acetate 5:1), 24.5 mg, 70% yield, yellow oil;  $^1H$  NMR (400 MHz,  $CDCl_3$ )  $\delta$  8.20 (br s, 1H), 7.63 (d,  $J = 7.9$  Hz, 2H), 7.42 (t,  $J = 7.6$  Hz, 2H), 7.29 (t,  $J = 7.4$  Hz, 1H), 6.92 (d,  $J = 8.1$  Hz, 1H), 6.85 (d,  $J = 8.3$  Hz, 1H), 6.84 (s, 1H), 4.36 (d,  $J = 5.6$  Hz, 1H), 4.20 – 4.04 (m, 3H), 2.37 (s, 3H), 2.26 – 2.18 (m, 1H), 1.19 (t,  $J = 6.7$  Hz, 3H), 1.18 (d,  $J = 6.7$  Hz, 3H), 1.11 (d,  $J = 6.7$  Hz, 3H).  $^{13}C$  NMR (100 MHz,  $CDCl_3$ )  $\delta$  174.3, 138.1, 137.4, 136.2, 132.5, 129.0, 127.3, 126.1, 124.9, 120.4, 115.4, 103.2, 98.1, 64.8, 60.7, 32.5, 18.9, 18.9, 17.5, 14.20. HRMS (ESI-TOF)  $m/z$ :  $[M+H]^+$  Calcd for

C<sub>22</sub>H<sub>26</sub>N<sub>2</sub>O<sub>2</sub> 350.1994; Found : 350.1991.

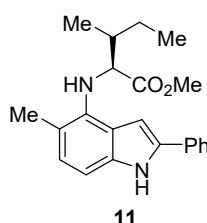

**Methyl (5-methyl-2-phenyl-1H-indol-4-yl)-L-isooleucinate (11)** (eluent: petroleum ether/ethyl acetate 5:1), 28.7 mg, 82% yield, yellow oil; <sup>1</sup>H NMR (400 MHz, CDCl<sub>3</sub>) δ 8.21 (br s, 1H), 7.62 (d, *J* = 7.5 Hz, 2H), 7.42 (t, *J* = 7.6 Hz, 2H), 7.29 (t, *J* = 7.4 Hz, 1H), 6.92 (d, *J* = 8.1 Hz, 1H), 6.85 (d, *J* = 8.2 Hz, 1H), 6.82 (s, 1H), 4.45 (d, *J* = 5.8 Hz, 1H), 4.26 (br s, 1H), 3.64 (s, 3H), 2.36 (s, 3H), 2.04 – 1.94 (m, 1H), 1.84 – 1.77 (m, 1H), 1.42 – 1.33 (m, 1H), 1.05 (d, *J* = 7.0 Hz, 3H), 1.01 (t, *J* = 7.4 Hz, 3H). <sup>13</sup>C NMR (100 MHz, CDCl<sub>3</sub>) δ 174.8, 138.0, 137.4, 136.3, 132.5, 129.0, 127.4, 126.1, 124.9, 120.5, 115.6, 103.3, 98.0, 63.7, 51.6, 39.3, 25.9, 17.5, 15.4, 11.9. HRMS (ESI-TOF) *m/z*: [M+H]<sup>+</sup> Calcd for C<sub>22</sub>H<sub>27</sub>N<sub>2</sub>O<sub>2</sub> 351.2067; Found : 351.2077.

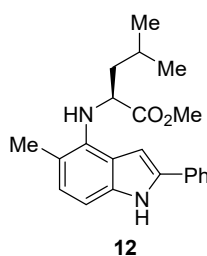

**Methyl (5-methyl-2-phenyl-1H-indol-4-yl)-L-leucinate (12)** (eluent: petroleum ether/ethyl acetate 5:1), 21.0 mg, 60% yield, yellow oil; <sup>1</sup>H NMR (400 MHz, CDCl<sub>3</sub>) δ 8.24 (br s, 1H), 7.62 (d, *J* = 7.7 Hz, 2H), 7.41 (t, *J* = 7.5 Hz, 2H), 7.29 (t, *J* = 7.4 Hz, 1H), 6.92 (d, *J* = 8.1 Hz, 1H), 6.85 (d, *J* = 8.2 Hz, 1H), 6.82 (s, 1H), 4.55 (t, *J* = 7.1 Hz, 1H), 3.63 (s, 3H), 2.36 (s, 3H), 1.95 – 1.85 (m, 1H), 1.77 – 1.73 (m, 2H), 1.02 (d, *J* = 6.3 Hz, 6H). <sup>13</sup>C NMR (100 MHz, CDCl<sub>3</sub>) δ 175.8, 137.8, 137.3, 136.3, 132.5, 128.9, 127.3, 126.0, 124.9, 120.7, 115.8, 103.6, 97.8, 58.2, 51.8, 43.9, 25.0, 22.8, 22.7, 17.5. HRMS (ESI-TOF) *m/z*: [M+H]<sup>+</sup> Calcd for C<sub>22</sub>H<sub>27</sub>N<sub>2</sub>O<sub>2</sub> 351.2067; Found : 351.2085.

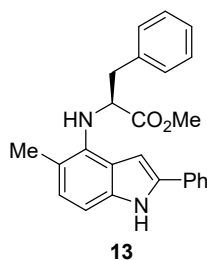

**Methyl (5-methyl-2-phenyl-1*H*-indol-4-yl)-*L*-phenylalaninate (13)** (eluent: petroleum ether/ethyl acetate 5:1), 21.9 mg, 57% yield, yellow oil; <sup>1</sup>H NMR (400 MHz, CDCl<sub>3</sub>) δ 8.21 (br s, 1H), 7.55 (d, *J* = 7.7 Hz, 2H), 7.40 (t, *J* = 7.5 Hz, 2H), 7.34 – 7.23 (m, 6H), 6.90 (d, *J* = 8.1 Hz, 1H), 6.85 (d, *J* = 8.1 Hz, 1H), 6.49 (s, 1H), 4.73 (t, *J* = 6.2 Hz, 1H), 3.61 (s, 3H), 3.17 (t, *J* = 5.8 Hz, 2H), 2.28 (s, 3H). <sup>13</sup>C NMR (100 MHz, CDCl<sub>3</sub>) δ 174.8, 137.6, 137.4, 137.2, 136.4, 132.5, 129.7, 129.0, 128.5, 127.4, 126.9, 126.0, 124.9, 120.9, 116.1, 103.7, 97.9, 61.1, 52.0, 40.6, 17.4. HRMS (ESI-TOF) *m/z*: [M+H]<sup>+</sup> Calcd for C<sub>25</sub>H<sub>25</sub>N<sub>2</sub>O<sub>2</sub> 385.1911; Found : 385.1929.

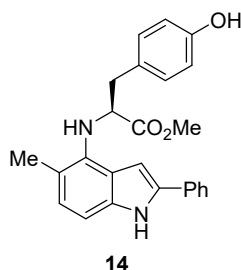

**Methyl (5-methyl-2-phenyl-1*H*-indol-4-yl)-*L*-tyrosinate (14)** (eluent: petroleum ether/ethyl acetate 2:1), 22.4 mg, 56% yield, yellow oil; <sup>1</sup>H NMR (400 MHz, CDCl<sub>3</sub>) δ 8.22 (br s, 1H), 7.56 (d, *J* = 7.6 Hz, 2H), 7.40 (t, *J* = 7.6 Hz, 2H), 7.27 (t, *J* = 7.4 Hz, 1H), 7.09 (d, *J* = 8.2 Hz, 2H), 6.90 (d, *J* = 8.1 Hz, 1H), 6.85 (d, *J* = 8.1 Hz, 1H), 6.74 (d, *J* = 8.3 Hz, 2H), 6.50 (s, 1H), 4.68 (t, *J* = 6.2 Hz, 1H), 3.61 (s, 3H), 3.10 (dd, *J* = 5.7 Hz, 3.5 Hz, 2H), 2.27 (s, 3H). <sup>13</sup>C NMR (100 MHz, CDCl<sub>3</sub>) δ 174.9, 154.6, 137.5, 137.3, 136.4, 132.4, 130.7, 129.0, 128.9, 127.4, 125.9, 124.9, 120.9, 116.0, 115.3, 103.6, 97.8, 61.1, 52.0, 39.5, 17.4. HRMS (ESI-TOF) *m/z*: [M+H]<sup>+</sup> Calcd for C<sub>25</sub>H<sub>25</sub>N<sub>2</sub>O<sub>3</sub> 401.1860; Found : 401.1866.

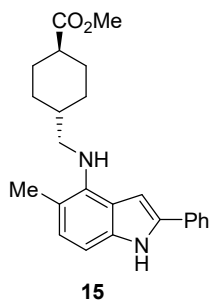

**Methyl (1r, 4r)-4-(((5-methyl-2-phenyl-1H-indol-4-yl)amino)methyl)cyclohexane-1-carboxylate (15)** (eluent: petroleum ether/ethyl acetate 5:1), 29.3 mg, 78% yield, yellow oil;  $^1\text{H}$  NMR (400 MHz,  $\text{CDCl}_3$ )  $\delta$  8.25 (br s, 1H), 7.63 (d,  $J = 7.8$  Hz, 2H), 7.41 (t,  $J = 7.7$  Hz, 2H), 7.28 (t,  $J = 7.5$  Hz, 1H), 6.92 (d,  $J = 8.1$  Hz, 1H), 6.86 (d,  $J = 1.3$  Hz, 1H), 6.81 (d,  $J = 8.1$  Hz, 1H), 3.66 (s, 3H), 3.39 (d,  $J = 6.5$  Hz, 2H), 2.32 – 2.24 (m, 4H), 2.04 – 2.01 (m, 5H), 1.51 – 1.41 (m, 2H), 1.14 – 1.04 (m, 2H).  $^{13}\text{C}$  NMR (100 MHz,  $\text{CDCl}_3$ )  $\delta$  176.4, 139.6, 137.8, 136.0, 132.6, 128.9, 127.3, 125.9, 124.9, 119.7, 113.6, 102.0, 98.6, 54.1, 51.5, 43.4, 38.4, 30.2, 28.6, 17.6. HRMS (ESI-TOF)  $m/z$ :  $[\text{M}+\text{H}]^+$  Calcd for  $\text{C}_{24}\text{H}_{29}\text{N}_2\text{O}_2$  377.2224; Found : 377.2228.

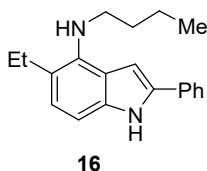

**N-butyl-5-ethyl-2-phenyl-1H-indol-4-amine (16)** (eluent: petroleum ether/ethyl acetate 10:1), 22.2 mg, 76% yield; yellow solid. m.p. : 80-81 °C;  $^1\text{H}$  NMR (400 MHz,  $\text{CDCl}_3$ )  $\delta$  8.23 (br s, 1H), 7.67 (d,  $J = 7.4$  Hz, 2H), 7.46 (t,  $J = 7.7$  Hz, 2H), 7.32 (t,  $J = 7.4$  Hz, 1H), 6.99 (d,  $J = 8.2$  Hz, 1H), 6.95 (d,  $J = 1.3$  Hz, 1H), 6.90 (d,  $J = 8.2$  Hz, 1H), 3.57 (t,  $J = 7.2$  Hz, 2H), 3.19 (br s, 1H), 2.68 (q,  $J = 7.6$  Hz, 2H), 1.75 – 1.68 (m, 2H), 1.56 – 1.47 (m, 2H), 1.30 (t,  $J = 7.6$  Hz, 3H), 1.01 (t,  $J = 7.3$  Hz, 3H).  $^{13}\text{C}$  NMR (100 MHz,  $\text{CDCl}_3$ )  $\delta$  139.5, 137.6, 136.0, 132.7, 129.0, 128.7, 127.3, 124.9, 124.4, 120.4, 102.4, 99.1, 48.1, 33.5, 24.4, 20.4, 14.9, 14.1. HRMS (ESI-TOF)  $m/z$ :  $[\text{M}+\text{H}]^+$  Calcd for  $\text{C}_{20}\text{H}_{25}\text{N}_2$  293.2012; Found : 293.2027.

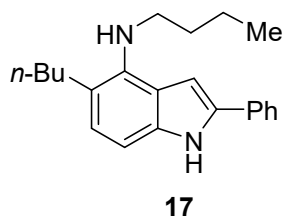

***N*, 5-dibutyl-2-phenyl-1*H*-indol-4-amine (17)** (eluent: petroleum ether/ethyl acetate 10:1), 18.9 mg, 59% yield; green solid. mp: 74-75 °C; <sup>1</sup>H NMR (400 MHz, CDCl<sub>3</sub>) δ 8.19 (br s, 1H), 7.63 (d, *J* = 7.4 Hz, 2H), 7.42 (t, *J* = 7.7 Hz, 2H), 7.28 (t, *J* = 7.4 Hz, 1H), 6.93 (d, *J* = 8.1 Hz, 1H), 6.91 (s, 1H), 6.85 (d, *J* = 8.1 Hz, 1H), 3.52 (t, *J* = 7.2 Hz, 2H), 2.94 (br s, 1H), 2.61 (t, *J* = 7.2 Hz, 2H), 1.71 – 1.64 (m, 2H), 1.64 – 1.56 (m, 2H), 1.52 – 1.38 (m, 4H), 0.98 (t, *J* = 7.3 Hz, 3H), 0.95 (t, *J* = 7.2 Hz, 3H). <sup>13</sup>C NMR (100 MHz, CDCl<sub>3</sub>) δ 139.6, 137.6, 136.0, 132.7, 129.0, 127.3, 125.3, 124.90, 120.5, 119.2, 102.4, 99.1, 48.2, 33.4, 32.8, 31.3, 22.8, 20.4, 14.1, 14.1. HRMS (ESI-TOF) *m/z*: [M+H]<sup>+</sup> Calcd for C<sub>22</sub>H<sub>29</sub>N<sub>2</sub> 321.2325; Found : 321.2328.

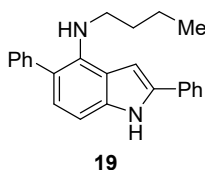

***N*-butyl-2,5-diphenyl-1*H*-indol-4-amine (19)** (eluent: petroleum ether/ethyl acetate 10:1), 15.6 mg, 46% yield; green oil. <sup>1</sup>H NMR (400 MHz, CDCl<sub>3</sub>) δ 8.31 (br s, 1H), 7.62 (d, *J* = 7.6 Hz, 2H), 7.44 - 7.38 (m, 6H), 7.35 – 7.26 (m, 2H), 6.97 (d, *J* = 8.4 Hz, 1H), 6.96 (s, 1H), 6.88 (d, *J* = 8.2 Hz, 1H), 3.95 (br s, 1H), 3.44 (t, *J* = 7.1 Hz, 2H), 1.48 (dt, *J* = 14.7, 7.2 Hz, 2H), 1.28 (dq, *J* = 14.3, 7.3 Hz, 2H), 0.86 (t, *J* = 7.3 Hz, 3H). <sup>13</sup>C NMR (100 MHz, CDCl<sub>3</sub>) δ 141.0, 139.4, 138.3, 136.2, 132.5, 130.0, 128.9, 128.7, 127.3, 126.5, 125.7, 124.9, 120.7, 119.6, 102.1, 99.5, 47.7, 32.9, 20.1, 13.9. HRMS (ESI-TOF) *m/z*: [M+H]<sup>+</sup> Calcd for C<sub>24</sub>H<sub>25</sub>N<sub>2</sub> 341.4775; Found : 341.4780.



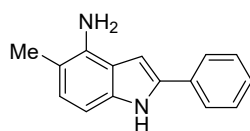

20

**5-methyl-2-phenyl-1H-indol-4-amine (20):** (eluent: petroleum ether/ethyl acetate 5:1), 17.1 mg, 77% yield; green solid; m.p. : 140-141 °C;  $^1\text{H}$  NMR (400 MHz,  $\text{CDCl}_3$ )  $\delta$  8.23 (br s, 1H), 7.63 (d,  $J = 7.6$  Hz, 2H), 7.42 (t,  $J = 7.7$  Hz, 2H), 7.29 (t,  $J = 7.4$  Hz, 1H), 6.92 (d,  $J = 8.1$  Hz, 1H), 6.80 (d,  $J = 8.1$  Hz, 1H), 6.71 (d,  $J = 1.9$  Hz, 1H), 3.90 (br s, 2H), 2.27 (s, 3H).  $^{13}\text{C}$  NMR (100 MHz,  $\text{CDCl}_3$ )  $\delta$  136.6, 136.5, 136.4, 132.5, 129.7, 127.0, 125.9, 124.8, 118.8, 111.1, 101.4, 95.9, 16.7. HRMS (ESI-TOF)  $m/z$ :  $[\text{M}+\text{H}]^+$  Calcd for  $\text{C}_{15}\text{H}_{15}\text{N}_2$  223.1230; Found : 223.1231.

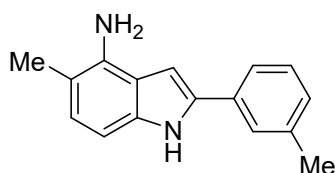

21

**5-methyl-2-(m-tolyl)-1H-indol-4-amine (21)** (eluent: petroleum ether/ethyl acetate 5:1), 13.0 mg, 55% yield; green solid; m.p. : 152-153 °C;  $^1\text{H}$  NMR (400 MHz,  $\text{CDCl}_3$ )  $\delta$  8.22 (s, 1H), 7.47 (s, 1H), 7.44 (d,  $J = 8.2$  Hz, 1H), 7.31 (t,  $J = 7.6$  Hz, 1H), 7.11 (d,  $J = 7.5$  Hz, 1H), 6.92 (d,  $J = 8.2$  Hz, 1H), 6.80 (d,  $J = 8.2$  Hz, 1H), 6.70 (dd,  $J = 2.1, 0.8$  Hz, 1H), 3.90 (br s, 2H), 2.41 (s, 3H), 2.27 (s, 3H).  $^{13}\text{C}$  NMR (100 MHz,  $\text{CDCl}_3$ )  $\delta$  138.6, 136.6, 136.5, 136.5, 132.5, 128.9, 128.1, 125.8, 125.6, 122.0, 118.8, 111.1, 101.4, 95.8, 21.5, 16.7. HRMS (ESI-TOF)  $m/z$ :  $[\text{M}+\text{H}]^+$  Calcd for  $\text{C}_{16}\text{H}_{17}\text{N}_2$  237.1386; Found : 237.1390.

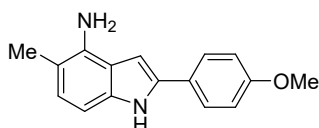

22

**2-(4-methoxyphenyl)-5-methyl-1H-indol-4-amine (22)** (eluent: petroleum ether/ethyl acetate 5:1), 13.6 mg, 54% yield; green solid; m.p. : 206-207 °C;  $^1\text{H}$  NMR (400 MHz,  $(\text{CD}_3)_2\text{CO}$ )  $\delta$  10.19 (br s, 1H), 7.72 (d,  $J = 8.6$  Hz, 2H), 6.98 (d,  $J = 8.6$  Hz,

2H), 6.83 (d,  $J = 1.2$  Hz, 1H), 6.75 (d,  $J = 8.1$  Hz, 1H), 6.65 (d,  $J = 8.1$  Hz, 1H), 4.52 (br s, 2H), 3.82 (s, 3H), 2.19 (s, 3H).  $^{13}\text{C}$  NMR (100 MHz,  $(\text{CD}_3)_2\text{CO}$ )  $\delta$  159.0, 137.7, 137.2, 135.7, 126.1, 125.9, 125.1, 119.0, 114.3, 109.2, 100.4, 94.9, 54.8, 16.2. HRMS (ESI-TOF)  $m/z$ :  $[\text{M}+\text{H}]^+$  Calcd for  $\text{C}_{16}\text{H}_{17}\text{N}_2\text{O}$  253.1335; Found : 253.1350.

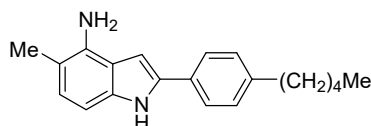

23

**5-methyl-2-(4-pentylphenyl)-1H-indol-4-amine (23)** (eluent: petroleum ether/ethyl acetate 5:1), 19.6 mg, 67% yield; green solid; m.p. : 193-194 °C;  $^1\text{H}$  NMR (400 MHz,  $(\text{CD}_3)_2\text{CO}$ )  $\delta$  10.28 (br s, 1H), 7.72 (d,  $J = 8.2$  Hz, 2H), 7.26 (d,  $J = 8.1$  Hz, 2H), 6.95 (d,  $J = 1.4$  Hz, 1H), 6.78 (d,  $J = 8.1$  Hz, 1H), 6.66 (d,  $J = 8.2$  Hz, 1H), 4.58 (br s, 2H), 2.64 (t,  $J = 7.6$  Hz, 2H), 2.21 (s, 3H), 1.65 (dt,  $J = 14.8, 7.4$  Hz, 2H) 1.38 – 1.33 (m, 4H), 0.89 (t,  $J = 6.9$  Hz, 3H).  $^{13}\text{C}$  NMR (100 MHz,  $(\text{CD}_3)_2\text{CO}$ )  $\delta$  141.4, 137.8, 137.3, 135.8, 130.8, 128.8, 125.3, 124.5, 118.9, 109.2, 100.4, 95.6, 35.3, 31.4, 31.1, 22.3, 16.2, 13.5. HRMS (ESI-TOF)  $m/z$ :  $[\text{M}+\text{H}]^+$  Calcd for  $\text{C}_{20}\text{H}_{25}\text{N}_2$  293.2012; Found : 293.2025.

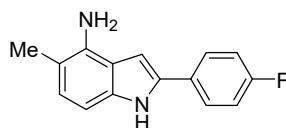

24

**2-(4-fluorophenyl)-5-methyl-1H-indol-4-amine (24)** (eluent: petroleum ether/ethyl acetate 5:1), 11.8 mg, 49% yield; green solid; m.p. : 193-194 °C;  $^1\text{H}$  NMR (400 MHz,  $(\text{CD}_3)_2\text{CO}$ )  $\delta$  10.30 (br s, 1H), 7.81 (dd,  $J = 8.5, 5.4$  Hz, 2H), 7.18 (t,  $J = 8.7$  Hz, 2H), 6.94 (d,  $J = 1.8$  Hz, 1H), 6.79 (d,  $J = 8.1$  Hz, 1H), 6.67 (d,  $J = 8.1$  Hz, 1H), 4.57 (br s, 2H), 2.20 (s, 3H).  $^{13}\text{C}$  NMR (100 MHz,  $(\text{CD}_3)_2\text{CO}$ )  $\delta$  161.8 (d,  $^1J_{\text{CF}} = 244.1$  Hz), 138.0, 137.4, 134.7, 129.9 (d,  $^4J_{\text{CF}} = 3.0$  Hz), 126.4 (d,  $^3J_{\text{CF}} = 7.9$  Hz), 125.7, 118.8, 115.6 (d,  $^2J_{\text{CF}} = 21.8$  Hz), 109.3, 100.4, 96.2, 16.2. HRMS (ESI-TOF)  $m/z$ :  $[\text{M}+\text{H}]^+$  Calcd for  $\text{C}_{15}\text{H}_{14}\text{FN}_2$  241.1136; Found : 241.1140.

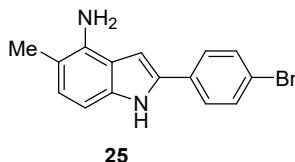

**2-(4-bromophenyl)-5-methyl-1H-indol-4-amine (25)** (eluent: petroleum ether/ethyl acetate 5:1), 16.9 mg, 56% yield; green solid; m.p. : 211-212 °C; <sup>1</sup>H NMR (400 MHz, (CD<sub>3</sub>)<sub>2</sub>CO) δ 10.36 (br s, 1H), 7.75 – 7.71 (m, 2H), 7.58 – 7.55 (m, 2H), 7.02 (d, *J* = 1.6 Hz, 1H), 6.80 (d, *J* = 8.1 Hz, 1H), 6.67 (d, *J* = 8.1 Hz, 1H), 4.61 (br s, 2H), 2.20 (s, 3H). <sup>13</sup>C NMR (100 MHz, (CD<sub>3</sub>)<sub>2</sub>CO) δ 138.1, 137.6, 134.3, 132.5, 131.8, 126.3, 126.0, 119.6, 118.8, 109.3, 100.4, 97.0, 16.1. HRMS (ESI-TOF) *m/z*: [M+H]<sup>+</sup> Calcd for C<sub>15</sub>H<sub>14</sub>BrN<sub>2</sub> 301.0335; Found : 301.0326.

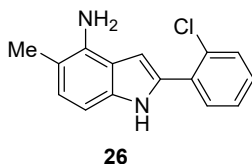

**2-(2-chlorophenyl)-5-methyl-1H-indol-4-amine (26)** (eluent: petroleum ether/ethyl acetate 5:1), 18.2 mg, 71% yield; green solid; m.p. : 190-191 °C; <sup>1</sup>H NMR (400 MHz, CDCl<sub>3</sub>) δ 8.68 br (s, 1H), 7.65 (dd, *J* = 7.7, 1.7 Hz, 1H), 7.46 (dd, *J* = 7.9, 1.3 Hz, 1H), 7.32 (td, *J* = 7.6, 1.4 Hz, 1H), 7.26 – 7.22 (m, 1H), 6.95 (d, *J* = 8.2 Hz, 1H), 6.82 (d, *J* = 8.2 Hz, 1H), 6.76 (dd, *J* = 2.2, 0.8 Hz, 1H), 3.92 (s, 2H), 2.27 (s, 3H). <sup>13</sup>C NMR (100 MHz, CDCl<sub>3</sub>) δ 136.6, 136.1, 133.5, 131.3, 131.1, 130.8, 130.4, 128.4, 127.2, 126.2, 117.9, 110.9, 101.5, 99.6, 16.7. HRMS (ESI-TOF) *m/z*: [M+H]<sup>+</sup> Calcd for C<sub>15</sub>H<sub>14</sub>ClN<sub>2</sub> 257.0840; Found : 257.0846.

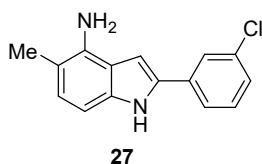

**2-(3-chlorophenyl)-5-methyl-1H-indol-4-amine (27)** (eluent: petroleum ether/ethyl acetate 5:1), 16.6 mg, 65% yield; green solid; m.p. : 184-185 °C; <sup>1</sup>H NMR (400 MHz,

(CD<sub>3</sub>)<sub>2</sub>CO)  $\delta$  10.40 (br s, 1H), 7.81 (t,  $J$  = 1.8 Hz, 1H), 7.74 (ddd,  $J$  = 7.9, 1.7, 1.0 Hz, 1H), 7.42 (t,  $J$  = 7.9 Hz, 1H), 7.26 (ddd,  $J$  = 8.0, 2.1, 0.9 Hz, 1H), 7.08 (dd,  $J$  = 2.3, 0.8 Hz, 1H), 6.81 (d,  $J$  = 8.1 Hz, 1H), 6.68 (d,  $J$  = 8.1 Hz, 1H), 4.62 (br s, 2H), 2.20 (s, 3H). <sup>13</sup>C NMR (100 MHz, (CD<sub>3</sub>)<sub>2</sub>CO)  $\delta$  138.2, 137.6, 135.3, 134.4, 133.8, 130.5, 126.2, 124.1, 122.8, 118.7, 109.3, 100.3, 97.5, 16.1. HRMS (ESI-TOF)  $m/z$ : [M+H]<sup>+</sup> Calcd for C<sub>15</sub>H<sub>14</sub>ClN<sub>2</sub> 257.0840; Found : 257.0848.

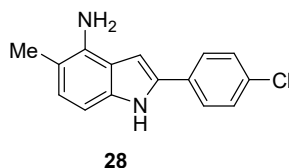

**2-(4-chlorophenyl)-5-methyl-1H-indol-4-amine (28)** (eluent: petroleum ether/ethyl acetate 5:1), 20.0 mg, 78% yield; green solid; m.p. : 187-188 °C; <sup>1</sup>H NMR (400 MHz, (CD<sub>3</sub>)<sub>2</sub>CO)  $\delta$  10.37 (br s, 1H), 7.79 (d,  $J$  = 8.5 Hz, 2H), 7.43 (d,  $J$  = 8.5 Hz, 2H), 7.01 (d,  $J$  = 1.7 Hz, 1H), 6.80 (d,  $J$  = 8.1 Hz, 1H), 6.67 (d,  $J$  = 8.1 Hz, 1H), 4.61 (br s, 2H), 2.20 (s, 3H). <sup>13</sup>C NMR (100 MHz, (CD<sub>3</sub>)<sub>2</sub>CO)  $\delta$  137.7, 137.2, 133.9, 131.8, 131.3, 128.5, 126.0, 125.6, 118.4, 108.9, 100.0, 96.6, 15.8. HRMS (ESI-TOF)  $m/z$ : [M+H]<sup>+</sup> Calcd for C<sub>15</sub>H<sub>14</sub>ClN<sub>2</sub> 257.0840; Found : 257.0849.

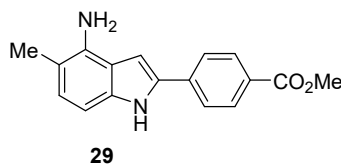

**Methyl 4-(4-amino-5-methyl-1H-indol-2-yl)benzoate (29)** (eluent: petroleum ether/ethyl acetate 2:1), 17.6 mg, 63% yield; yellow solid; m.p. : 217-218 °C; <sup>1</sup>H NMR (400 MHz, (CD<sub>3</sub>)<sub>2</sub>CO)  $\delta$  10.49 (br s, 1H), 8.03 (d,  $J$  = 8.4 Hz, 2H), 7.90 (d,  $J$  = 8.3 Hz, 2H), 7.18 (d,  $J$  = 1.2 Hz, 1H), 6.83 (d,  $J$  = 8.1 Hz, 1H), 6.69 (d,  $J$  = 8.1 Hz, 1H), 4.70 (br s, 2H), 3.89 (s, 3H), 2.20 (s, 3H). <sup>13</sup>C NMR (101 MHz, (CD<sub>3</sub>)<sub>2</sub>CO)  $\delta$  166.1, 138.3, 137.9, 137.5, 134.2, 130.0, 127.8, 126.6, 124.1, 118.8, 109.3, 149.3, 98.5, 51.4, 16.1. HRMS (ESI-TOF)  $m/z$ : [M+H]<sup>+</sup> Calcd for C<sub>17</sub>H<sub>17</sub>N<sub>2</sub>O<sub>2</sub> 281.1285; Found: 281.1299.

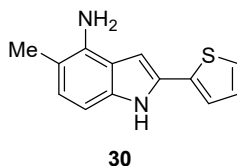

**5-methyl-2-(thiophen-2-yl)-1H-indol-4-amine (28)** (eluent: petroleum ether/ethyl acetate 5:1), 12.1 mg, 53% yield; green solid; m.p.: 180-181 °C; <sup>1</sup>H NMR (400 MHz, CDCl<sub>3</sub>) δ 8.12 (br s, 1H), 7.24 (dd, *J* = 5.1, 1.1 Hz, 1H), 7.20 (dd, *J* = 3.6, 1.0 Hz, 1H), 7.06 (dd, *J* = 5.0, 3.6 Hz, 1H), 6.91 (d, *J* = 8.2 Hz, 1H), 6.76 (d, *J* = 8.1 Hz, 1H), 6.60 (d, *J* = 2.0 Hz, 1H), 3.91 (br s, 1H), 2.26 (s, 3H). <sup>13</sup>C NMR (100 MHz, CDCl<sub>3</sub>) δ 136.5, 136.2, 135.9, 130.8, 127.8, 126.0, 124.0, 122.3, 118.6, 111.3, 101.3, 96.5, 16.7. HRMS (ESI-TOF) *m/z*: [M+H]<sup>+</sup> Calcd for C<sub>13</sub>H<sub>13</sub>N<sub>2</sub>S 229.0794; Found : 229.0798.

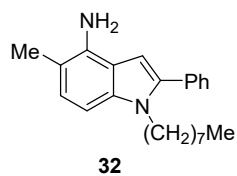

**5-methyl-1-octyl-2-phenyl-1H-indol-4-amine (32)** (eluent: petroleum ether/ethyl acetate 10:1), 21.0 mg, 63% yield, yellow oil; <sup>1</sup>H NMR (400 MHz, CDCl<sub>3</sub>) δ 7.52 – 7.40 (m, 5H), 6.99 (d, *J* = 8.2 Hz, 1H), 6.81 (d, *J* = 8.2 Hz, 1H), 6.41 (s, 1H), 4.11 (t, *J* = 7.6 Hz, 2H), 2.32 (s, 3H), 1.72 – 1.64 (m, 2H), 1.29 – 1.18 (m, 10H), 0.88 (t, *J* = 7.1 Hz, 3H). <sup>13</sup>C NMR (100 MHz, CDCl<sub>3</sub>) δ 139.9, 137.2, 136.5, 133.6, 129.4, 128.4, 127.7, 125.0, 117.6, 110.8, 100.8, 97.9, 44.1, 31.8, 29.9, 29.1, 29.0, 26.8, 22.6, 16.7, 14.1. HRMS (ESI-TOF) *m/z*: [M+H]<sup>+</sup> Calcd for C<sub>23</sub>H<sub>31</sub>N<sub>2</sub> 335.2482; Found : 335.2499.

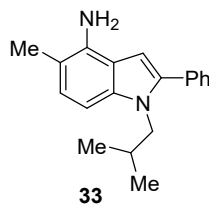

**1-isobutyl-5-methyl-2-phenyl-1*H*-indol-4-amine (33)** (eluent: petroleum ether/ethyl acetate 10:1), 16.1 mg, 58% yield, yellow oil; <sup>1</sup>H NMR (400 MHz, CDCl<sub>3</sub>) δ 7.47 – 7.34 (m, 5H), 6.94 (d, *J* = 8.3 Hz, 1H), 6.77 (d, *J* = 8.2 Hz, 1H), 6.36 (s, 1H), 3.95 (d, *J* = 7.5 Hz, 2H), 3.77 (br s, 2H), 2.27 (s, 3H), 2.08 – 1.93 (m, 1H), 0.63 (d, *J* = 6.7 Hz, 6H). <sup>13</sup>C NMR (100 MHz, CDCl<sub>3</sub>) δ 140.2, 137.4, 136.4, 133.8, 129.5, 128.3, 127.5, 124.8, 117.5, 110.7, 101.2, 98.1, 51.3, 28.8, 20.0, 16.6. HRMS (ESI-TOF) *m/z*: [M+H]<sup>+</sup> Calcd for C<sub>19</sub>H<sub>23</sub>N<sub>2</sub> 279.1856; Found : 279.1869.

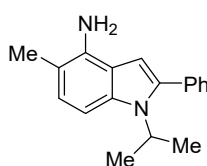

34

**1-isopropyl-5-methyl-2-phenyl-1*H*-indol-4-amine (34)** (eluent: petroleum ether/ethyl acetate 10:1), 18.7 mg, 71% yield, yellow oil; <sup>1</sup>H NMR (400 MHz, CDCl<sub>3</sub>) δ 7.44 – 7.36 (m, 5H), 7.00 (d, *J* = 8.3 Hz, 1H), 6.91 (d, *J* = 8.4 Hz, 1H), 6.31 (s, 1H), 4.62 (hept, *J* = 7.0 Hz, 1H), 3.77 (br s, 2H), 2.27 (s, 3H), 1.58 (d, *J* = 7.0 Hz, 6H). <sup>13</sup>C NMR (100 MHz, CDCl<sub>3</sub>) δ 139.9, 136.7, 135.1, 133.9, 129.5, 128.3, 127.7, 124.4, 118.4, 110.5, 103.2, 97.9, 47.8, 21.4, 16.5. HRMS (ESI-TOF) *m/z*: [M+H]<sup>+</sup> Calcd for C<sub>18</sub>H<sub>21</sub>N<sub>2</sub> 265.1699; Found : 265.1704.

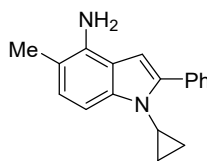

35

**1-cyclopropyl-5-methyl-2-phenyl-1*H*-indol-4-amine (35)** (eluent: petroleum ether/ethyl acetate 10:1), 15.7 mg, 60% yield, green oil; <sup>1</sup>H NMR (400 MHz, CDCl<sub>3</sub>) δ 7.61 (d, *J* = 7.1 Hz, 2H), 7.41 (t, *J* = 7.4 Hz, 2H), 7.33 (t, *J* = 7.3 Hz, 1H), 6.98 (d, *J* = 8.3 Hz, 1H), 6.95 (d, *J* = 8.3 Hz, 1H), 6.38 (s, 1H), 3.79 (br s, 2H), 3.41 – 3.36 (m, 1H), 2.27 (s, 3H), 0.93 – 0.89 (m, 2H), 0.66 – 0.62 (m, 2H). <sup>13</sup>C NMR (100 MHz, CDCl<sub>3</sub>) δ 140.2, 138.7, 136.5, 133.7, 128.6, 128.1, 127.1, 125.0, 117.0, 111.0, 101.7, 97.7, 26.2,

16.6, 9.0. HRMS (ESI-TOF)  $m/z$ :  $[M+H]^+$  Calcd for  $C_{18}H_{19}N_2$  263.1543; Found : 263.1557.

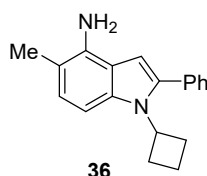

**1-cyclobutyl-5-methyl-2-phenyl-1H-indol-4-amine (36)** (eluent: petroleum ether/ethyl acetate 10:1), 17.9 mg, 65% yield, green oil;  $^1H$  NMR (400 MHz,  $CDCl_3$ )  $\delta$  7.45 – 7.35 (m, 5H), 7.13 (d,  $J = 8.3$  Hz, 1H), 6.94 (d,  $J = 8.3$  Hz, 1H), 6.31 (s, 1H), 4.94 (p,  $J = 8.9$  Hz, 1H), 3.83 (br s, 2H), 3.00 – 2.90 (m, 2H), 2.33 – 2.27 (m, 5H), 1.94 – 1.86 (m, 1H), 1.79 – 1.67 (m, 1H).  $^{13}C$  NMR (100 MHz,  $CDCl_3$ )  $\delta$  140.1, 136.8, 136.3, 133.8, 129.3, 128.3, 127.6, 124.6, 118.2, 110.7, 102.9, 98.0, 50.9, 29.5, 16.5, 14.4. HRMS (ESI-TOF)  $m/z$ :  $[M+H]^+$  Calcd for  $C_{19}H_{21}N_2$  277.1699; Found : 277.1698.

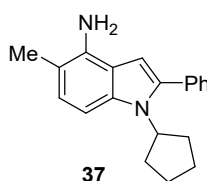

**1-cyclopentyl-5-methyl-2-phenyl-1H-indol-4-amine (37)** (eluent: petroleum ether/ethyl acetate 10:1), 16.8 mg, 58% yield, green oil;  $^1H$  NMR (400 MHz,  $CDCl_3$ )  $\delta$  7.46 – 7.36 (m, 5H), 6.91 (d,  $J = 8.4$  Hz, 1H), 6.87 (d,  $J = 8.4$  Hz, 1H), 6.32 (s, 1H), 4.74 (p,  $J = 9.0$  Hz, 1H), 3.84 (br s, 2H), 2.43 – 2.33 (m, 2H), 2.27 (s, 3H), 1.97 – 1.91 (m, 4H), 1.67 – 1.64 (m, 2H).  $^{13}C$  NMR (100 MHz,  $CDCl_3$ )  $\delta$  140.6, 136.9, 134.6, 133.9, 129.4, 128.4, 127.6, 124.4, 118.4, 110.5, 102.8, 97.7, 57.1, 29.9, 25.2, 16.5. HRMS (ESI-TOF)  $m/z$ :  $[M+H]^+$  Calcd for  $C_{20}H_{23}N_2$  291.1856; Found : 291.1879.

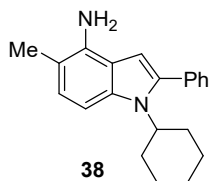

**1-cyclohexyl-5-methyl-2-phenyl-1*H*-indol-4-amine (38)** (eluent: petroleum ether/ethyl acetate 10:1), 18.5 mg, 61% yield, green oil; <sup>1</sup>H NMR (400 MHz, CDCl<sub>3</sub>) δ 7.46 – 7.36 (m, 5H), 7.04 (d, *J* = 8.4 Hz, 1H), 6.90 (d, *J* = 8.4 Hz, 1H), 6.32 (s, 1H), 4.19 – 4.11 (m, 1H), 3.80 (br s, 2H), 2.38 – 2.32 (m, 2H), 2.26 (s, 3H), 1.89 – 1.86 (m, 4H), 1.27 – 1.20 (m, 4H). <sup>13</sup>C NMR (100 MHz, CDCl<sub>3</sub>) δ 140.0, 136.6, 135.5, 134.0, 129.5, 128.3, 127.6, 124.3, 118.4, 110.4, 103.5, 98.0, 56.3, 31.3, 26.2, 25.5, 16.5. HRMS (ESI-TOF) *m/z*: [M+H]<sup>+</sup> Calcd for C<sub>21</sub>H<sub>25</sub>N<sub>2</sub> 305.2012; Found : 305.2036.

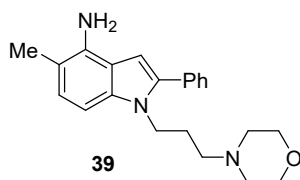

**5-methyl-1-(3-morpholinopropyl)-2-phenyl-1*H*-indol-4-amine (39)** (eluent: petroleum ether/ethyl acetate 5:1), 20.9 mg, 60% yield, yellow oil; <sup>1</sup>H NMR (400 MHz, CDCl<sub>3</sub>) δ 7.49 – 7.37 (m, 5H), 6.95 (d, *J* = 8.3 Hz, 1H), 6.79 (d, *J* = 8.2 Hz, 1H), 6.39 (s, 1H), 4.20 (t, *J* = 7.2 Hz 2H), 3.60 – 3.58 (m, 4H), 2.28 (s, 3H), 2.23 – 2.20 (m, 4H), 2.16 (t, *J* = 6.9 Hz, 2H), 1.80 – 1.73 (m, 2H). <sup>13</sup>C NMR (100 MHz, CDCl<sub>3</sub>) δ 139.6, 137.3, 136.5, 133.4, 129.3, 128.4, 127.7, 125.0, 117.6, 110.8, 100.6, 98.2, 66.8, 55.5, 53.3, 41.8, 26.5, 16.7. HRMS (ESI-TOF) *m/z*: [M+H]<sup>+</sup> Calcd for C<sub>22</sub>H<sub>28</sub>N<sub>3</sub>O 350.2227; Found : 350.2238.

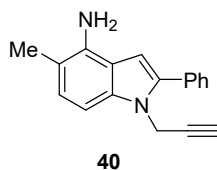

**5-methyl-2-phenyl-1-(prop-2-yn-1-yl)-1*H*-indol-4-amine (40)** (eluent: petroleum



ether/ethyl acetate 10:1), 17.9 mg, 69% yield, white-off solid, mp: 121-122 °C; <sup>1</sup>H NMR (400 MHz, CDCl<sub>3</sub>) δ 7.60 (d, *J* = 7.1 Hz, 2H), 7.47 (t, *J* = 7.4 Hz, 2H), 7.40 (t, *J* = 7.3 Hz, 1H), 7.02 (d, *J* = 8.2 Hz, 1H), 6.89 (d, *J* = 8.2 Hz, 1H), 6.45 (s, 1H), 4.76 (d, *J* = 2.4 Hz, 2H), 3.87 (br s, 2H), 2.34 (t, *J* = 2.4 Hz, 1H), 2.28 (s, 3H). <sup>13</sup>C NMR (100 MHz, CDCl<sub>3</sub>) δ 139.3, 137.4, 136.6, 132.4, 129.1, 128.7, 127.9, 125.6, 117.5, 111.7, 100.5, 98.5, 79.1, 72.5, 34.2, 16.7. HRMS (ESI-TOF) *m/z*: [M+H]<sup>+</sup> Calcd for C<sub>18</sub>H<sub>17</sub>N<sub>2</sub> 261.1386; Found : 260.1390.

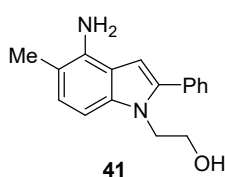

**2-(4-amino-5-methyl-2-phenyl-1H-indol-1-yl)ethan-1-ol (41)** (eluent: petroleum ether/ethyl acetate 2:1), 18.1 mg, 68% yield, yellow oil; <sup>1</sup>H NMR (400 MHz, CDCl<sub>3</sub>) δ 7.50 – 7.48 (m, 2H), 7.43 – 7.34 (m, 3H), 6.93 (d, *J* = 8.3 Hz, 1H), 6.77 (d, *J* = 8.2 Hz, 1H), 6.35 (s, 1H), 4.20 (t, *J* = 5.9 Hz, 2H), 3.73 (t, *J* = 5.9 Hz, 2H), 2.23 (s, 3H). <sup>13</sup>C NMR (100 MHz, CDCl<sub>3</sub>) δ 140.1, 137.4, 136.4, 133.0, 129.6, 128.5, 127.8, 125.3, 117.6, 111.2, 100.7, 98.5, 61.4, 46.0, 16.6. HRMS (ESI-TOF) *m/z*: [M+H]<sup>+</sup> Calcd for C<sub>17</sub>H<sub>19</sub>N<sub>2</sub>O 267.1492; Found : 267.1501.

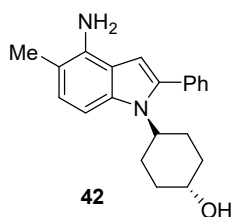

**(1s,4s)-4-(4-amino-5-methyl-2-phenyl-1H-indol-1-yl)cyclohexan-1-ol (42)** (eluent: petroleum ether/ethyl acetate 2:1), 19.2 mg, 60% yield, white-off solid, mp: 95-96 °C; <sup>1</sup>H NMR (400 MHz, CDCl<sub>3</sub>) δ 7.47 – 7.38 (m, 5H), 6.94 (d, *J* = 8.4 Hz, 1H), 6.90 (d, *J* = 8.4 Hz, 1H), 6.33 (s, 1H), 4.23 – 4.14 (m, 1H), 3.79 – 3.71 (m, 1H), 2.52 – 2.41 (m, 2H), 2.26 (s, 3H), 2.07 – 2.04 (m, 2H), 1.89 – 1.86 (m, 2H), 1.37 – 1.25 (m, 2H). <sup>13</sup>C

NMR (100 MHz, CDCl<sub>3</sub>)  $\delta$  140.1, 136.7, 135.3, 133.7, 129.4, 128.4, 127.8, 124.5, 118.3, 110.6, 103.2, 98.3, 69.8, 55.2, 34.9, 28.8, 16.5. HRMS (ESI-TOF)  $m/z$ : [M+H]<sup>+</sup> Calcd for C<sub>21</sub>H<sub>25</sub>N<sub>2</sub>O 321.1961; Found : 321.1977.

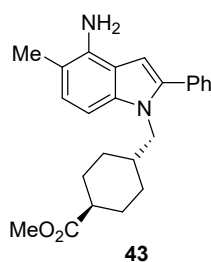

**Methyl (1r,4r)-4-((4-amino-5-methyl-2-phenyl-1H-indol-1yl)methyl)cyclohexane-1-carboxylate (43)** (eluent: petroleum ether/ethyl acetate 5:1), 26.3 mg, 70% yield, yellow oil; <sup>1</sup>H NMR (400 MHz, CDCl<sub>3</sub>)  $\delta$  7.48 – 7.41 (m, 5H), 6.99 (d,  $J$  = 8.2 Hz, 1H), 6.79 (d,  $J$  = 8.2 Hz, 1H), 6.41 (s, 1H), 4.03 (d,  $J$  = 7.3 Hz, 2H), 3.90 (br s, 2H), 3.62 (s, 3H), 2.32 (s, 3H), 2.16 – 2.06 (m, 2H), 1.86 – 1.83 (m, 2H), 1.49 – 1.46 (m, 2H), 1.27 – 1.17 (m, 2H), 0.79 – 0.69 (m, 2H). <sup>13</sup>C NMR (100 MHz, CDCl<sub>3</sub>)  $\delta$  176.2, 140.1, 137.5, 136.4, 133.6, 129.5, 128.4, 127.6, 124.9, 117.5, 110.8, 101.0, 98.2, 51.4, 49.8, 42.9, 37.4, 29.7, 28.2, 16.6. HRMS (ESI-TOF)  $m/z$ : [M+H]<sup>+</sup> Calcd for C<sub>24</sub>H<sub>29</sub>N<sub>2</sub>O<sub>2</sub> 377.2224; Found : 377.2225.

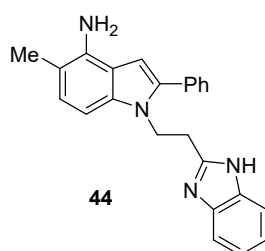

**1-(2-(1H-benzo[d]imidazol-2-yl)ethyl)-5-methyl-2-phenyl-1H-indol-4-amine (44)** (eluent: dichloromethane/methanol 10:1), 20.1 mg, 55% yield, yellow solid, m.p. : 200-201°C; <sup>1</sup>H NMR (400 MHz, CD<sub>3</sub>OD)  $\delta$  7.38 – 7.33 (m, 2H), 7.26 – 7.13 (m, 8H), 6.89 (d,  $J$  = 8.2 Hz, 1H), 6.85 (d,  $J$  = 8.2 Hz, 1H), 6.43 (s, 1H), 4.59 (t,  $J$  = 6.9 Hz, 2H), 3.11 (t,  $J$  = 6.9 Hz, 2H), 2.25 (s, 3H). <sup>13</sup>C NMR (100 MHz, CD<sub>3</sub>OD)  $\delta$  153.5, 141.1, 139.7,

138.8, 138.4, 134.5, 130.4, 129.7, 128.8, 126.7, 123.6, 120.1, 115.7, 113.2, 102.1, 100.6, 44.1, 30.5, 17.2. HRMS (ESI-TOF)  $m/z$ :  $[M+H]^+$  Calcd for  $C_{24}H_{23}N_4$  367.1917; Found : 367.1938.

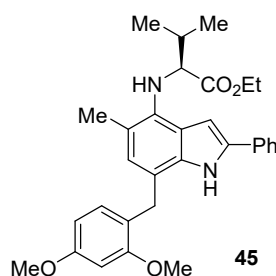

**Ethyl (7-(2,4-dimethoxybenzyl)-5-methyl-2-phenyl-1H-indol-4-yl)-L-valinate (45)** (eluent: petroleum ether/ethyl acetate 5:1), 30.0 mg, 60% yield, yellow oil;  $^1H$  NMR (400 MHz,  $CDCl_3$ )  $\delta$  9.11 (br s, 1H), 7.60 (d,  $J = 7.8$  Hz, 2H), 7.41 (t,  $J = 7.5$  Hz, 2H), 7.28 (t,  $J = 7.4$  Hz, 1H), 7.13 (d,  $J = 8.3$  Hz, 1H), 6.84 (s, 1H), 6.78 (s, 1H), 6.51 (s, 1H), 6.42 (d,  $J = 8.4$  Hz, 1H), 4.27 (d,  $J = 5.7$  Hz, 1H), 4.14 – 4.03 (m, 3H), 4.00 (s, 5H), 3.74 (s, 3H), 2.37 (s, 3H), 2.21 – 2.16 (m, 1H), 1.17 (t,  $J = 6.4$  Hz, 3H), 1.16 (d,  $J = 6.5$  Hz, 3H), 1.09 (d,  $J = 6.7$  Hz, 3H).  $^{13}C$  NMR (100 MHz,  $CDCl_3$ )  $\delta$  174.6, 159.2, 156.6, 136.5, 136.2, 135.8, 133.1, 131.3, 128.9, 127.0, 126.0, 124.7, 121.5, 120.7, 117.0, 115.4, 105.6, 99.0, 98.0, 64.9, 60.5, 56.2, 55.4, 32.4, 30.4, 18.9, 17.5, 14.2. HRMS (ESI-TOF)  $m/z$ :  $[M+H]^+$  Calcd for  $C_{31}H_{37}N_2O_4$  501.2748; Found : 501.2748.

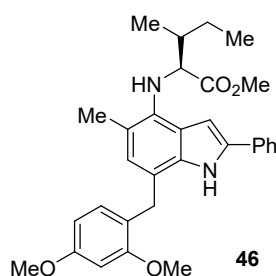

**Methyl (7-(2,4-dimethoxybenzyl)-5-methyl-2-phenyl-1H-indol-4-yl)-L-isoleucinate (46)** (eluent: petroleum ether/ethyl acetate 5:1), 33.0 mg, 66% yield, yellow oil;  $^1H$  NMR (400 MHz,  $CDCl_3$ )  $\delta$  9.16 (br s, 1H), 7.65 (d,  $J = 7.5$  Hz, 2H), 7.46 (t,  $J = 7.6$  Hz, 2H), 7.32 (t,  $J = 7.3$  Hz, 1H), 7.18 (d,  $J = 8.4$  Hz, 1H), 6.89 (s, 1H), 6.82

(s, 1H), 6.56 (d,  $J = 1.7$  Hz, 1H), 6.47 (d,  $J = 8.4$ , 1H), 4.42 (d,  $J = 5.8$  Hz, 1H), 4.19 (s, 2H), 4.05 (s, 2H), 4.04 (s, 3H), 3.78 (s, 3H), 3.67 (s, 3H), 2.41 (s, 3H), 2.02 – 1.95 (m, 1H), 1.88 – 1.79 (m, 1H), 1.45 – 1.36 (m, 1H), 1.09 (d,  $J = 7.0$  Hz, 3H), 1.05 (t,  $J = 6.7$  Hz, 3H).  $^{13}\text{C}$  NMR (100 MHz,  $\text{CDCl}_3$ )  $\delta$  175.0, 159.2, 156.7, 136.3, 136.1, 135.9, 133.1, 131.3, 128.9, 127.0, 126.0, 124.8, 121.5, 120.9, 117.1, 115.6, 105.6, 99.1, 97.9, 63.8, 56.2, 55.3, 51.5, 39.3, 30.4, 25.9, 17.4, 15.4. HRMS (ESI-TOF)  $m/z$ :  $[\text{M}+\text{H}]^+$  Calcd for  $\text{C}_{31}\text{H}_{37}\text{N}_2\text{O}_4$  501.2748; Found : 501.2765.

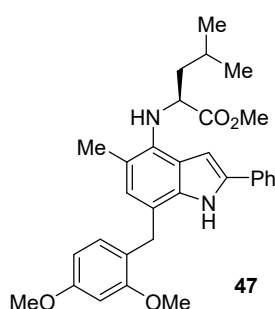

**Methyl (7-(2,4-dimethoxybenzyl)-5-methyl-2-phenyl-1H-indol-4-yl)-L-leucinate (47)** (eluent: petroleum ether/ethyl acetate 5:1), 31.0 mg, 62% yield, yellow oil;  $^1\text{H}$  NMR (400 MHz,  $\text{CDCl}_3$ )  $\delta$  9.11 (br s, 1H), 7.59 (d,  $J = 7.7$  Hz, 2H), 7.41 (t,  $J = 7.6$  Hz, 2H), 7.28 (t,  $J = 7.4$  Hz, 1H), 7.13 (d,  $J = 8.4$  Hz, 1H), 6.84 (s, 1H), 6.76 (s, 1H), 6.51 (s, 1H), 6.43 (d,  $J = 8.3$  Hz, 1H), 4.45 (t,  $J = 7.1$  Hz, 1H), 4.00 (s, 5H), 3.73 (s, 3H), 3.61 (s, 3H), 2.35 (s, 3H), 1.93 – 1.83 (m, 1H), 1.74 – 1.68 (m, 2H), 1.01 (d,  $J = 6.5$  Hz, 6H).  $^{13}\text{C}$  NMR (100 MHz,  $\text{CDCl}_3$ )  $\delta$  176.0, 159.3, 156.7, 136.2, 136.1, 136.0, 133.1, 131.3, 128.9, 127.1, 126.0, 124.8, 121.5, 121.1, 117.4, 115.9, 105.6, 99.1, 97.8, 58.4, 56.2, 55.4, 51.7, 43.9, 30.4, 25.1, 22.9, 22.7, 17.5. HRMS (ESI-TOF)  $m/z$ :  $[\text{M}+\text{H}]^+$  Calcd for  $\text{C}_{31}\text{H}_{37}\text{N}_2\text{O}_4$  501.2748; Found : 501.2750.

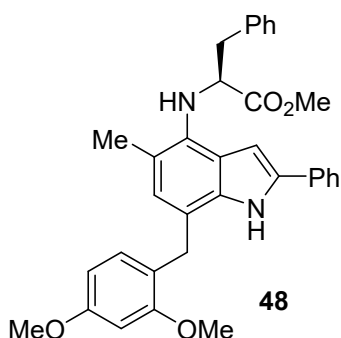

**Methyl (7-(2,4-dimethoxybenzyl)-5-methyl-2-phenyl-1H-indol-4-yl)-L-phenylalaninate (48)** (eluent: petroleum ether/ethyl acetate 5:1), 27.2 mg, 51% yield, yellow oil;  $^1\text{H}$  NMR (400 MHz,  $\text{CDCl}_3$ )  $\delta$  9.09 (br s, 1H), 7.52 (d,  $J = 7.6$  Hz, 2H), 7.40 (t,  $J = 7.6$  Hz, 2H), 7.32 – 7.23 (m, 6H), 7.12 (d,  $J = 8.3$  Hz, 1H), 6.82 (s, 1H), 6.50 (d,  $J = 1.6$  Hz, 1H), 6.43–4.60 (m, 2H), 4.62 (t,  $J = 6.4$  Hz, 1H), 3.98 (s, 5H), 3.72 (s, 3H), 3.59 (s, 3H), 3.18 – 3.09 (m, 2H), 2.29 (s, 3H).  $^{13}\text{C}$  NMR (100 MHz,  $\text{CDCl}_3$ )  $\delta$  174.9, 159.3, 156.7, 137.3, 136.1, 136.0, 135.9, 133.0, 131.3, 129.6, 128.8, 128.3, 127.0, 126.8, 125.9, 124.7, 121.5, 121.2, 117.6, 116.1, 105.6, 99.1, 97.8, 61.4, 56.2, 55.3, 51.8, 40.6, 30.4, 17.3. HRMS (ESI-TOF)  $m/z$ :  $[\text{M}+\text{H}]^+$  Calcd for  $\text{C}_{34}\text{H}_{35}\text{N}_2\text{O}_4$  535.2591; Found : 535.2597.

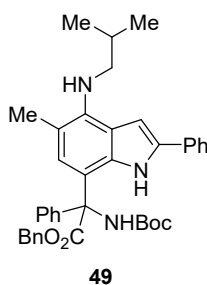

**benzyl 2-((tert-butoxycarbonyl)amino)-2-(4-(isobutylamino)-5-methyl-2-phenyl-1H-indol-7-yl)-2-phenylacetate (49)** (eluent: dichloromethane / petroleum ether 4:1), 40.1 mg, 65% yield, green oil;  $^1\text{H}$  NMR (400 MHz,  $\text{CDCl}_3$ )  $\delta$  8.89 (br s, 1H), 7.57 – 7.45 (m, 2H), 7.34 – 7.27 (m, 7H), 7.23 – 7.18 (m, 4H), 7.16 – 7.12 (m, 2H), 6.82 (d,  $J = 1.7$  Hz, 1H), 6.66 (s, 1H), 6.15 (s, 1H), 5.26 (s, 1H), 5.20 (q,  $J = 12.3$  Hz, 2H), 3.39 (d,  $J = 6.7$  Hz, 2H), 2.14 (s, 3H), 1.98 – 1.88 (m, 1H), 1.32 (s, 9H), 1.04 (d,  $J = 6.6$  Hz, 6H).  $^{13}\text{C}$  NMR (100 MHz,  $\text{CDCl}_3$ )  $\delta$  171.5, 154.8, 140.5, 135.78, 135.0, 134.8, 132.3, 128.8, 128.4, 128.2, 128.2, 127.8, 127.7, 127.0, 125.2, 124.6, 112.6, 111.9, 97.8, 80.2,

68.7, 67.9, 55.2, 29.5, 28.2, 20.4, 17.7. HRMS (ESI-TOF)  $m/z$ :  $[M+H]^+$  Calcd for  $C_{39}H_{44}N_3O_4$  618.3326; Found : 618.2248.

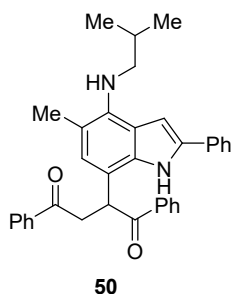

**2-(4-(isobutylamino)-5-methyl-2-phenyl-1H-indol-7-yl)-1,4-diphenylbutane-1,4-dione (50)** (eluent: petroleum ether/ethyl acetate 5:1), 45.7 mg, 89% yield, green oil;  $^1H$  NMR (400 MHz,  $CDCl_3$ )  $\delta$  9.57 (s, 1H), 8.13 (d,  $J = 7.4$  Hz, 2H), 7.94 (d,  $J = 7.9$  Hz, 2H), 7.74 (d,  $J = 7.4$  Hz, 2H), 7.53 – 7.37 (m, 9H), 7.29 (t,  $J = 7.4$  Hz, 1H), 6.90 (d,  $J = 2.0$  Hz, 1H), 6.88 (s, 1H), 5.49 (dd,  $J = 9.7, 3.9$  Hz, 1H), 4.48 (dd,  $J = 18.4, 9.8$  Hz, 1H), 3.44 (dd,  $J = 18.5, 3.9$  Hz, 1H), 3.35 (d,  $J = 6.7$  Hz, 2H), 2.23 (s, 3H), 1.96 – 1.85 (m, 1H), 1.02 (d,  $J = 6.6$  Hz, 6H).  $^{13}C$  NMR (100 MHz,  $CDCl_3$ )  $\delta$  200.4, 199.0, 139.8, 136.8, 136.5, 136.3, 136.2, 133.3, 133.0, 132.5, 129.0, 129.0, 128.6, 128.5, 128.2, 127.3, 126.8, 124.9, 120.4, 113.6, 110.0, 98.5, 55.3, 46.4, 41.9, 29.5, 20.4, 17.6. HRMS (ESI-TOF)  $m/z$ :  $[M+H]^+$  Calcd for  $C_{35}H_{35}N_2O_2$  515.2693; Found : 515.2689.

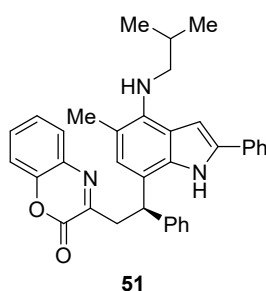

**(R)-3-(2-(4-(isobutylamino)-5-methyl-2-phenyl-1H-indol-7-yl)-2-phenylethyl)-2H-benzo[b][1,4]oxazin-2-one (51)** (eluent: petroleum ether/ethyl acetate 5:1), 41.1 mg, 78% yield, 99% *ee*, green oil; The enantiomeric excess was determined by HPLC (Daicel Chiralpak AD, hexane/*i*-PrOH = 80:20 (v/v),  $\lambda = 254$  nm, flow rate = 1.0 mL/min, 25 °C):  $t_{major} = 37.4$  min,  $t_{minor} = 39.8$  min, 60.0 min.  $^1H$  NMR (400 MHz,

CDCl<sub>3</sub>) δ 9.44 (br s, 1H), 7.76 (d, *J* = 7.5 Hz, 2H), 7.65 (dd, *J* = 7.9, 1.1 Hz, 1H), 7.51 – 7.39 (m, 5H), 7.37 – 7.19 (m, 7H), 6.92 (d, *J* = 2.0 Hz, 1H), 6.50 (s, 1H), 5.08 (dd, *J* = 10.0, 4.3 Hz, 1H), 3.82 (dd, *J* = 14.5, 4.3 Hz, 1H), 3.64 (dd, *J* = 14.5, 10.1 Hz, 1H), 3.34 (d, *J* = 6.7 Hz, 2H), 2.18 (s, 3H), 1.97 – 1.86 (m, 1H), 1.03 (d, *J* = 6.6 Hz, 6H). <sup>13</sup>C NMR (100 MHz, CDCl<sub>3</sub>) δ 156.0, 153.9, 146.2, 141.1, 138.8, 136.1, 132.7, 131.2, 130.8, 129.0, 128.9, 128.8, 128.5, 127.1, 126.8, 125.6, 124.7, 124.3, 119.8, 117.9, 116.3, 112.9, 98.7, 55.6, 43.5, 39.9, 29.5, 20.5, 17.7. HRMS (ESI-TOF) *m/z*: [M+H]<sup>+</sup> Calcd for C<sub>35</sub>H<sub>34</sub>N<sub>3</sub>O<sub>2</sub> 528.2646; Found : 528.2650.

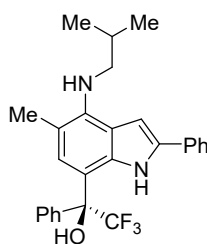

52

**(S)-2,2,2-trifluoro-1-(4-(isobutylamino)-5-methyl-2-phenyl-1H-indol-7-yl)-1-phenylethan-1-ol (52)** (eluent: dichloromethane / petroleum ether 2:1), 42.9 mg, 95% yield, 77% *ee*, green oil; The enantiomeric excess was determined by HPLC (Daicel Chiralpak AD, hexane/*i*-PrOH = 80:20 (v/v), λ = 254 nm, flow rate = 1.0 mL/min, 25 °C): *t*<sub>major</sub> = 7.4 min, *t*<sub>minor</sub> = 10.5 min, 30.0 min. <sup>1</sup>H NMR (400 MHz, CDCl<sub>3</sub>) δ 8.42 (s, 1H), 7.63 -7.58 (m, 2H), 7.41 – 7.24 (m, 8H), 7.19-7.16 (m, 1H), 6.92 (s, 1H), 6.64 (d, *J* = 2.0 Hz, 1H), 4.41 (s, 1H), 3.73 (s, 1H), 3.73 – 3.24 (m, 2H), 2.20 (s, 3H), 1.97 – 1.87 (m, 1H), 1.03 (d, *J* = 6.5 Hz, 6H). <sup>13</sup>C NMR (100 MHz, CDCl<sub>3</sub>) δ 140.0, 138.7, 135.6, 135.3, 132.1, 128.8, 128.7, 128.2, 127.5, 127.1, 124.5 (q, *J* = 286.3 Hz), 124.6, 124.2, 120.2, 112.4, 111.9, 97.6, 79.8 (q, *J* = 28.9 Hz), 55.5, 29.3, 20.5, 17.7. HRMS (ESI-TOF) *m/z*: [M+H]<sup>+</sup> Calcd for C<sub>27</sub>H<sub>28</sub>F<sub>3</sub>N<sub>2</sub>O 453.2148; Found : 453.2153.

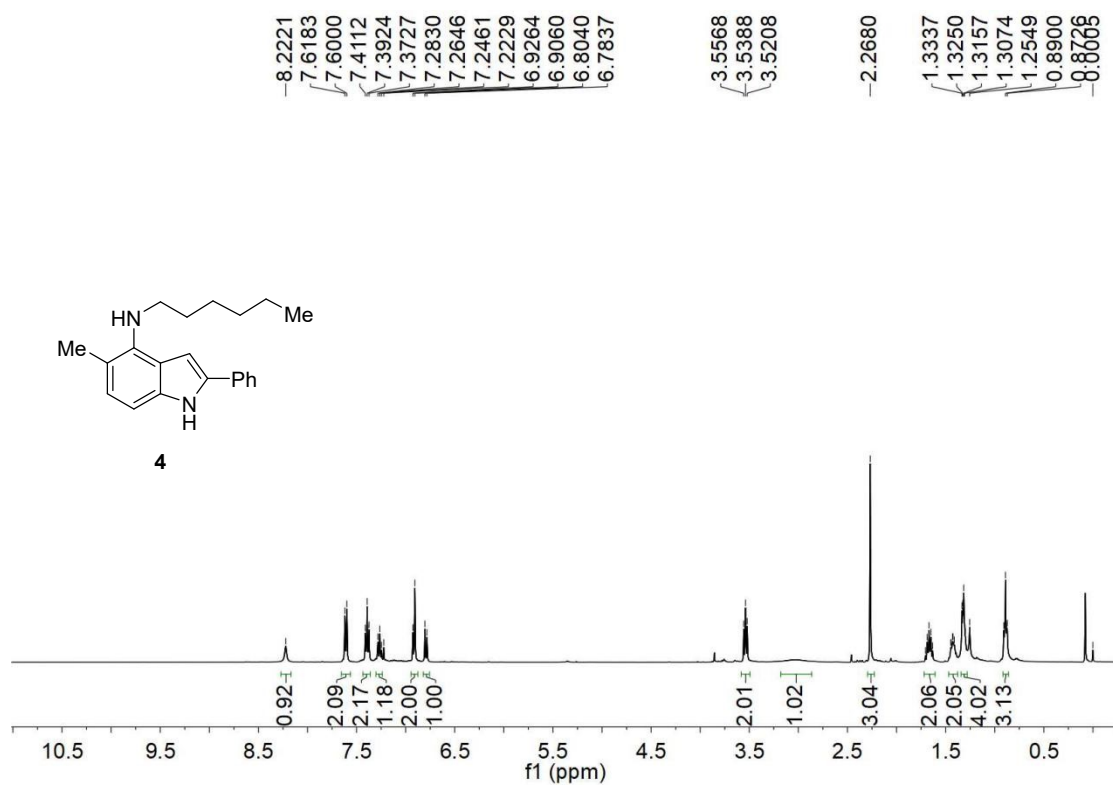



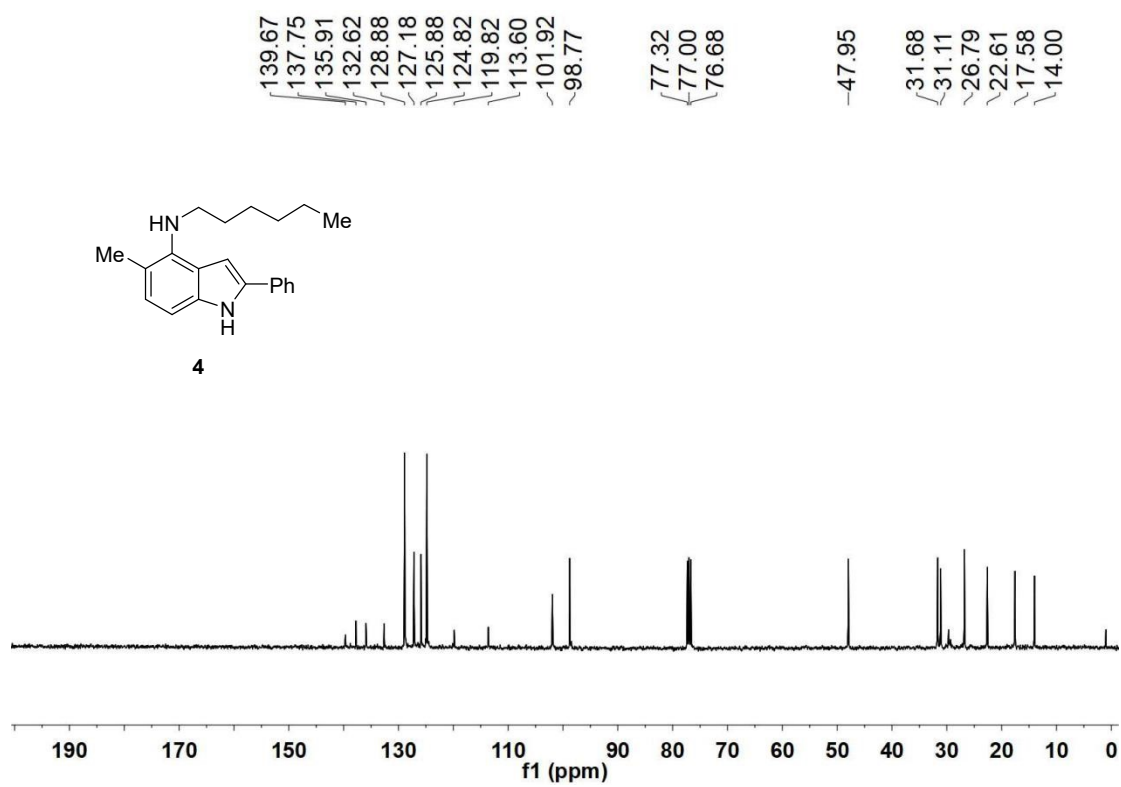

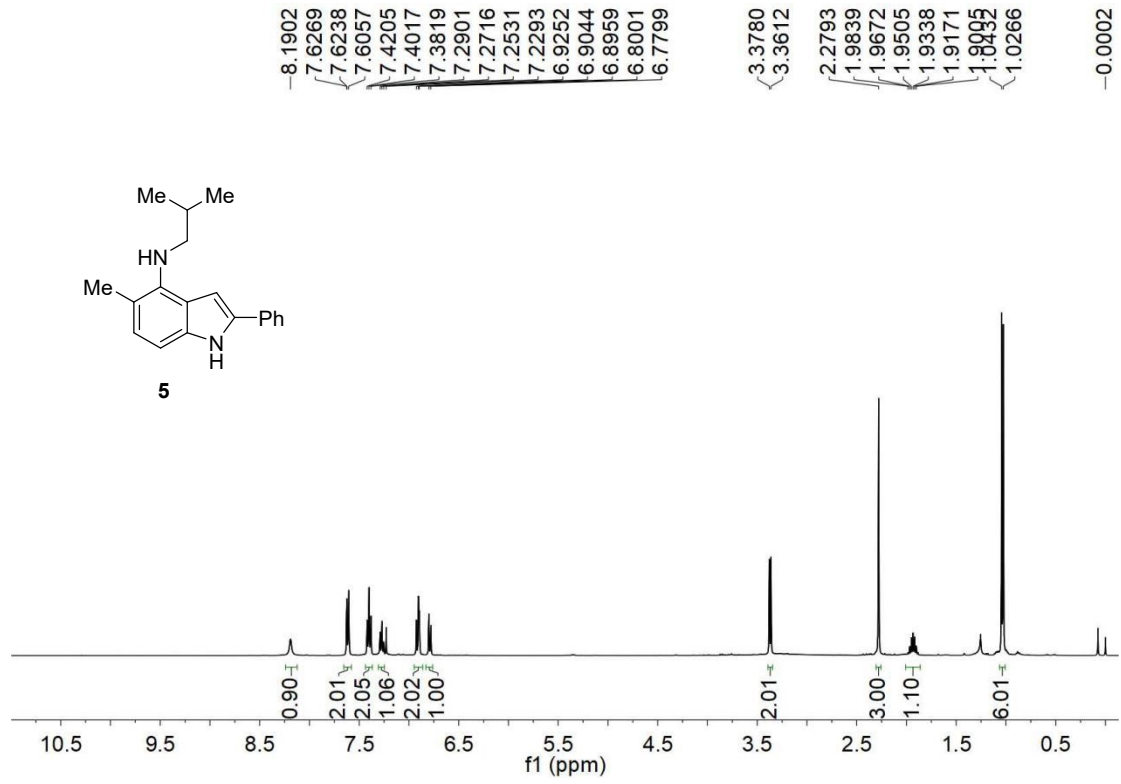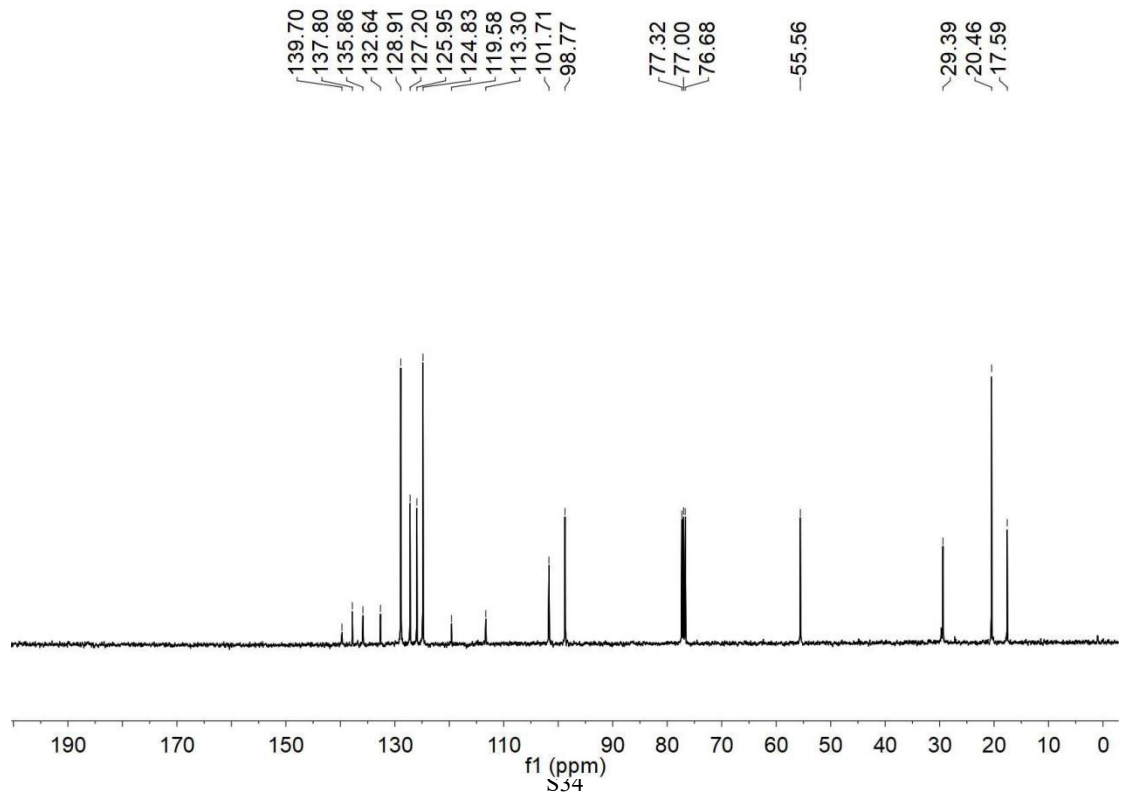

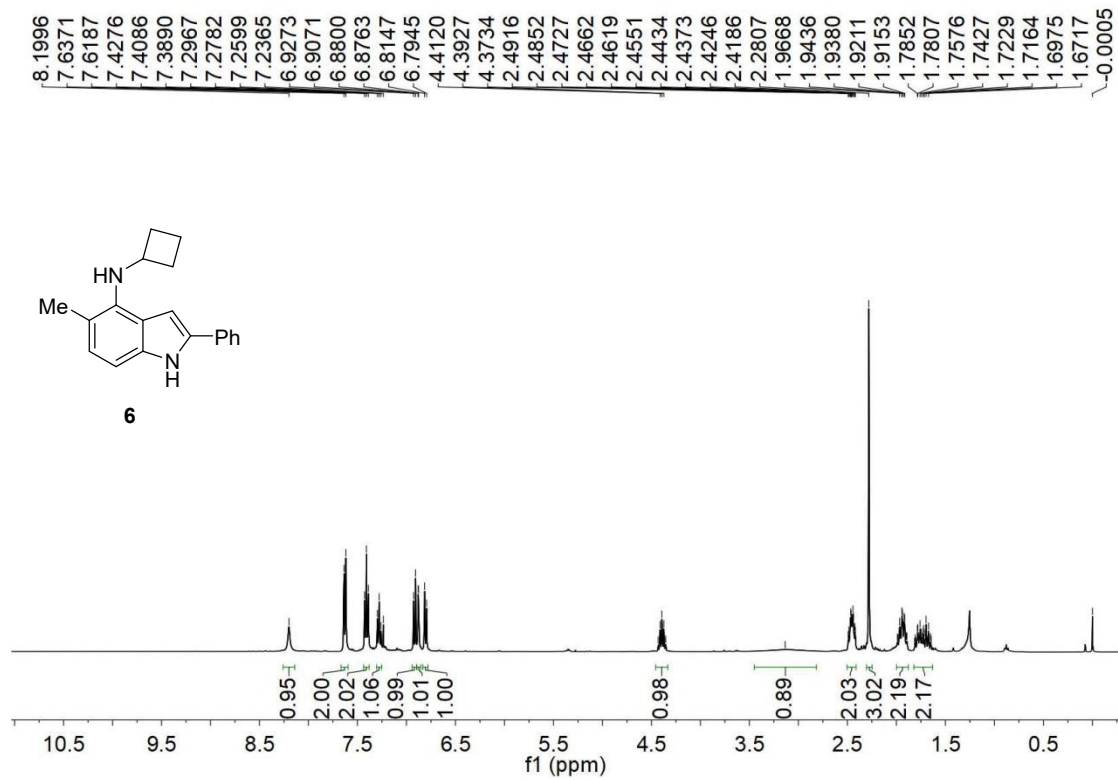

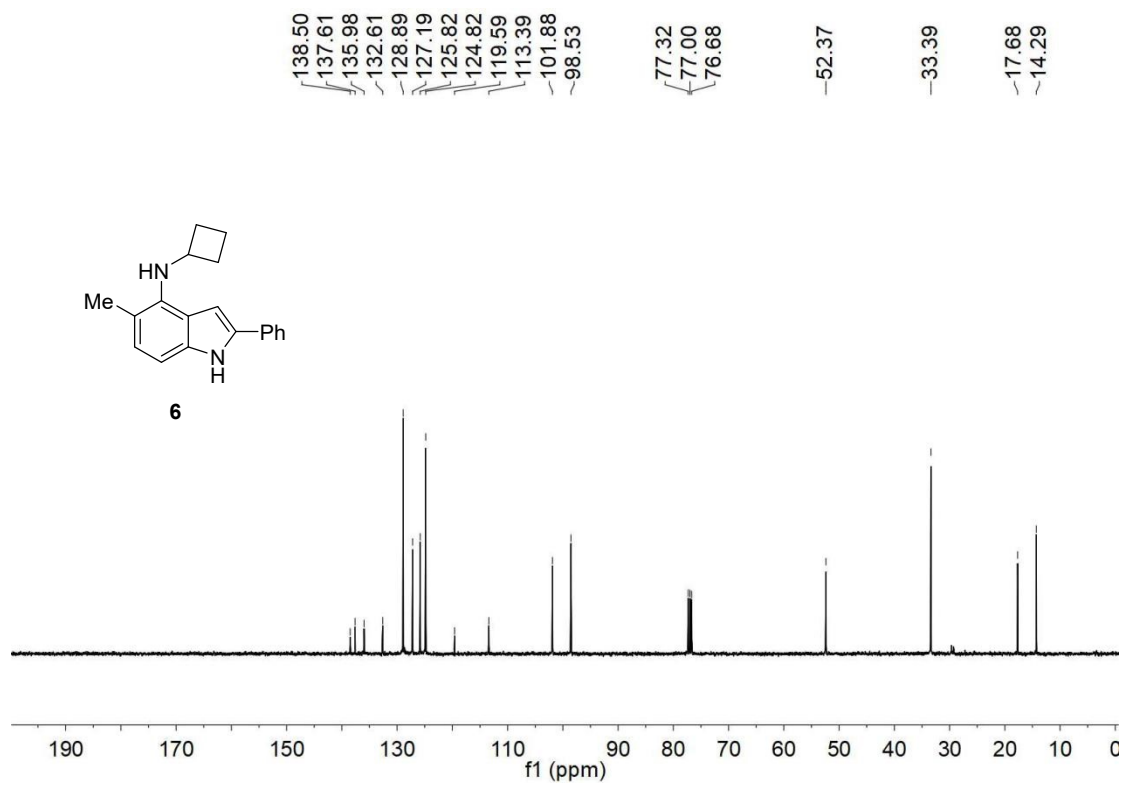

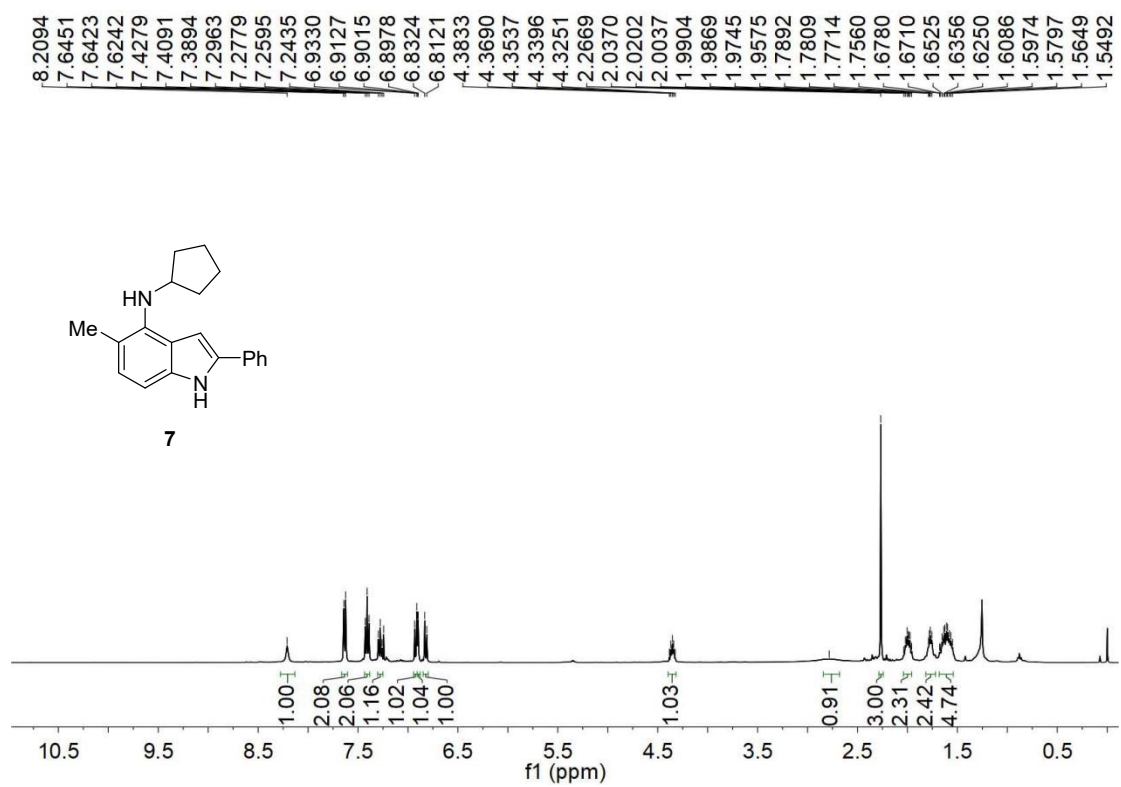

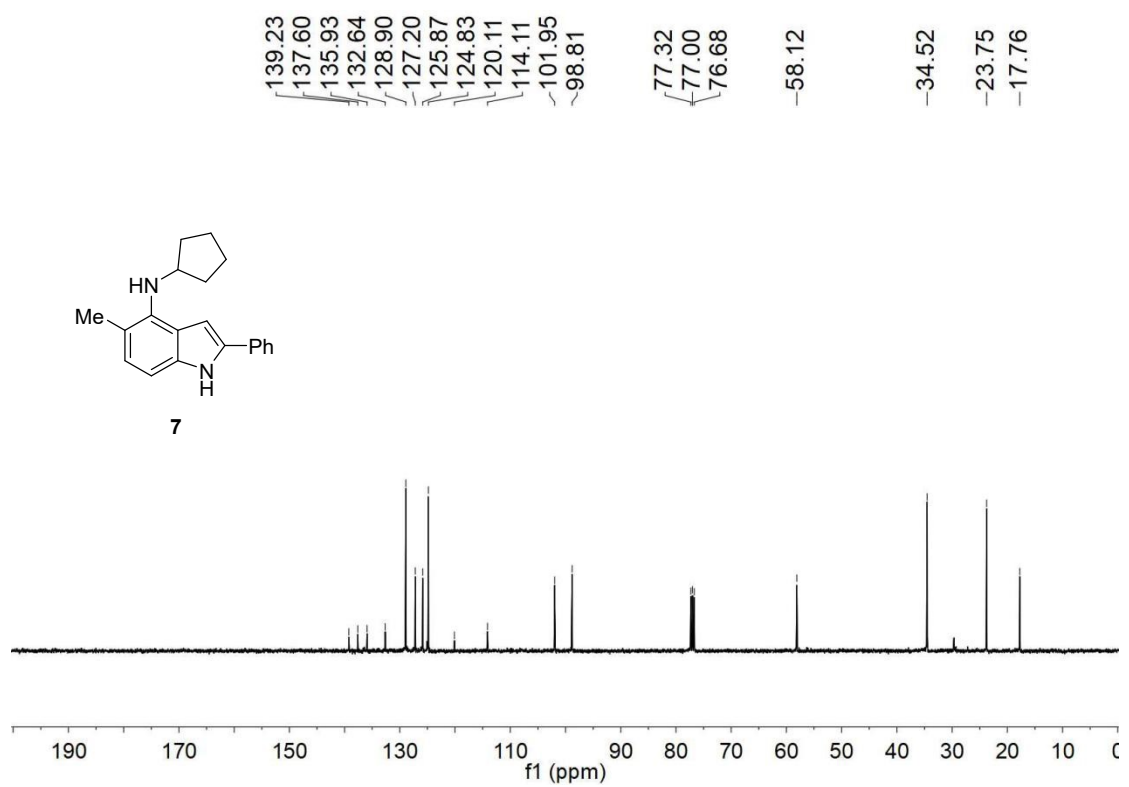

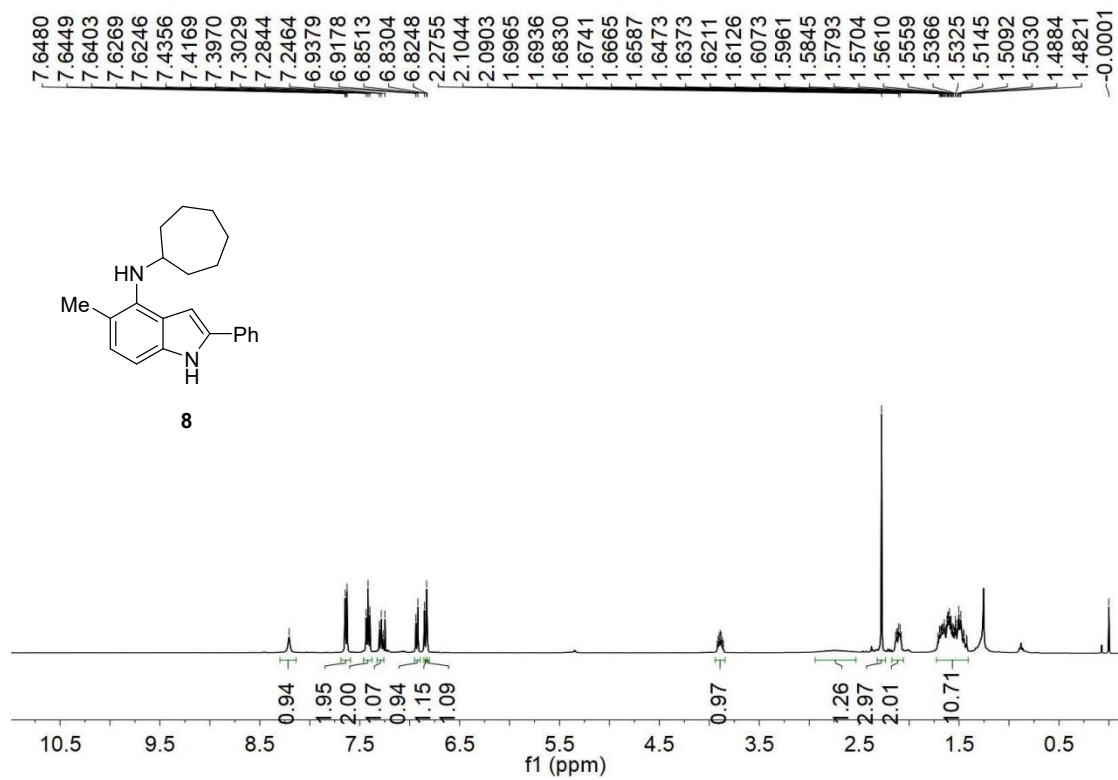

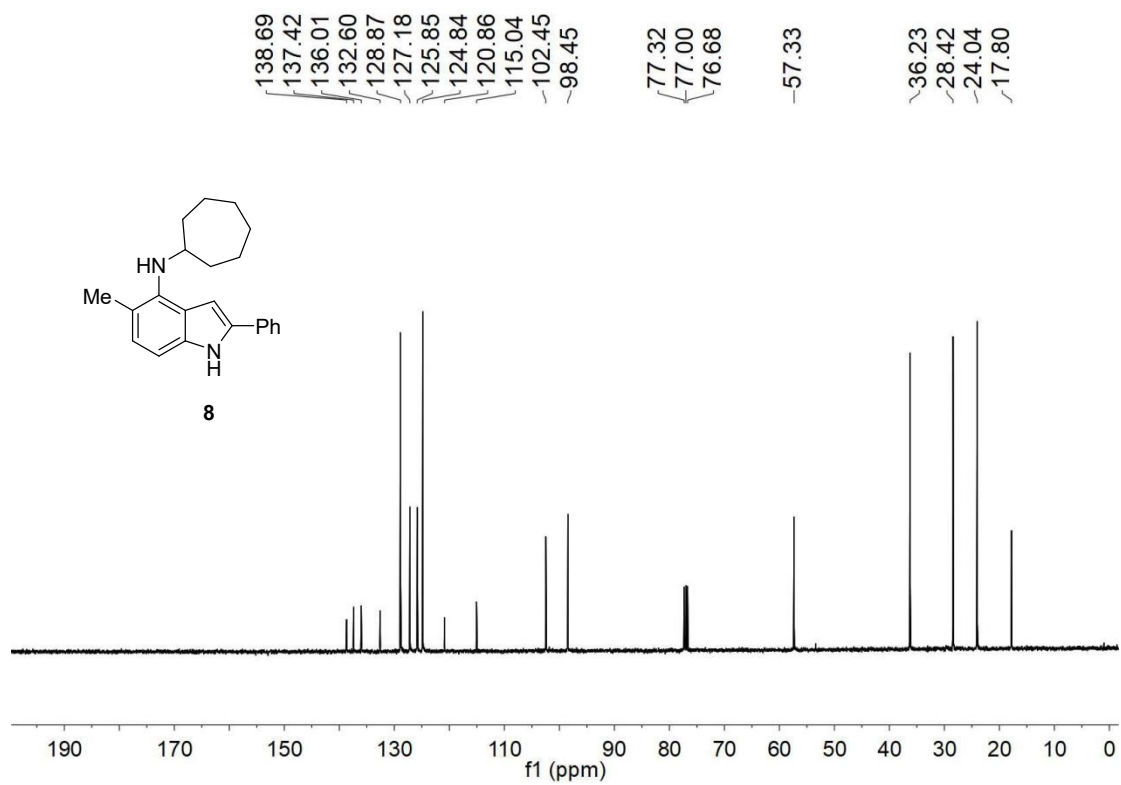



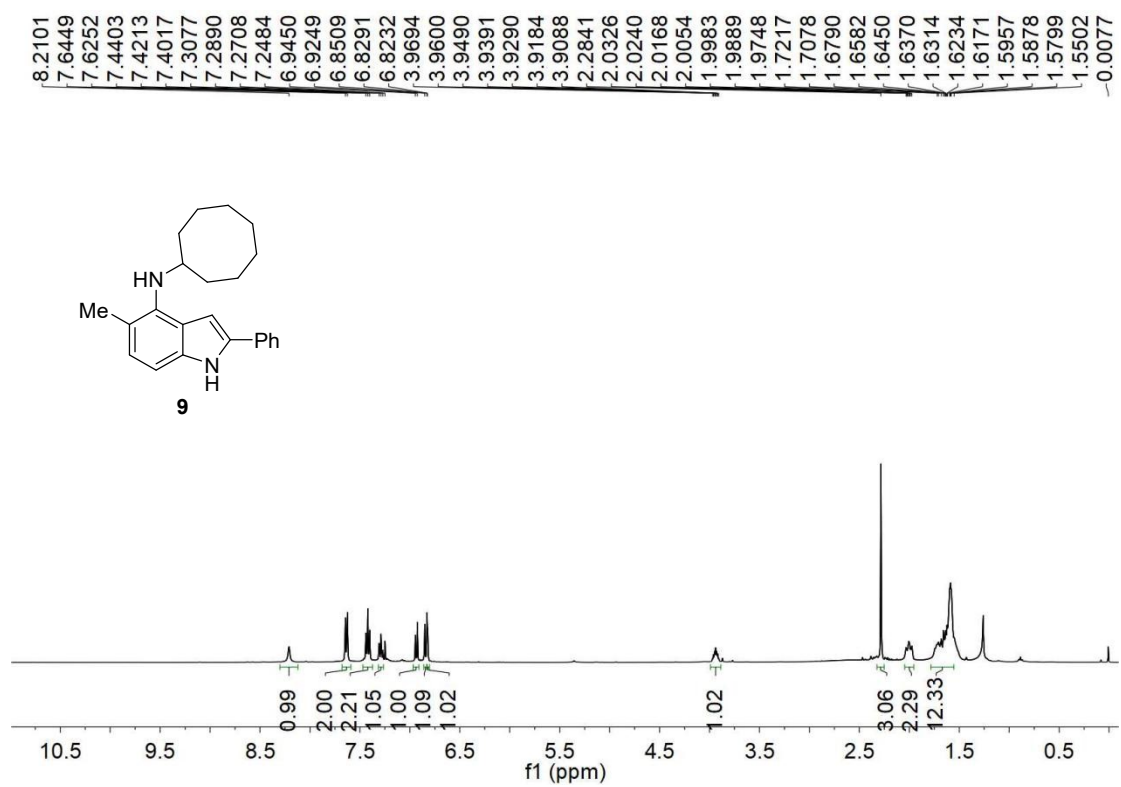

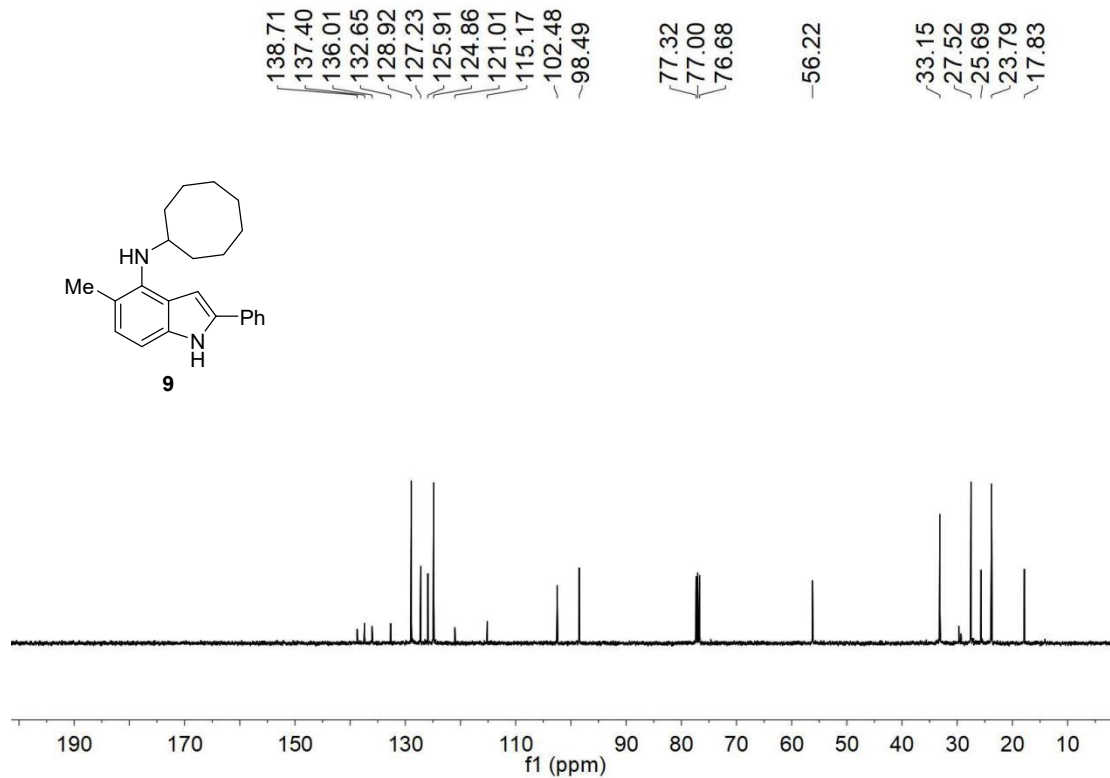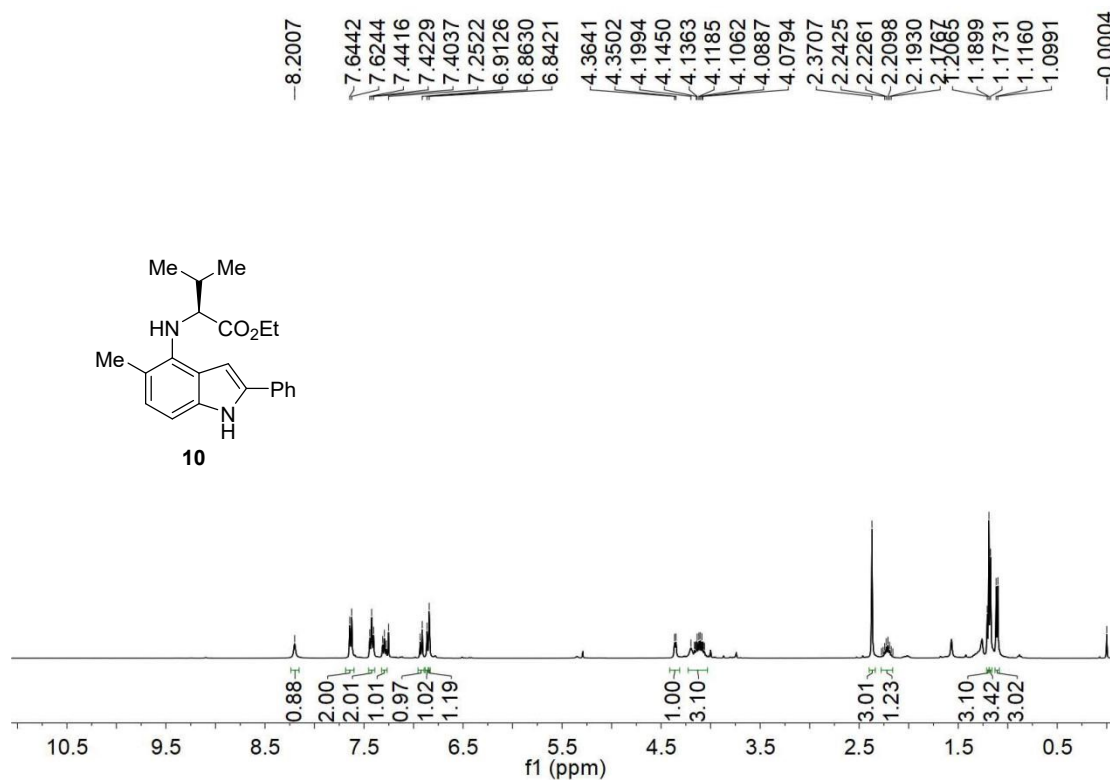

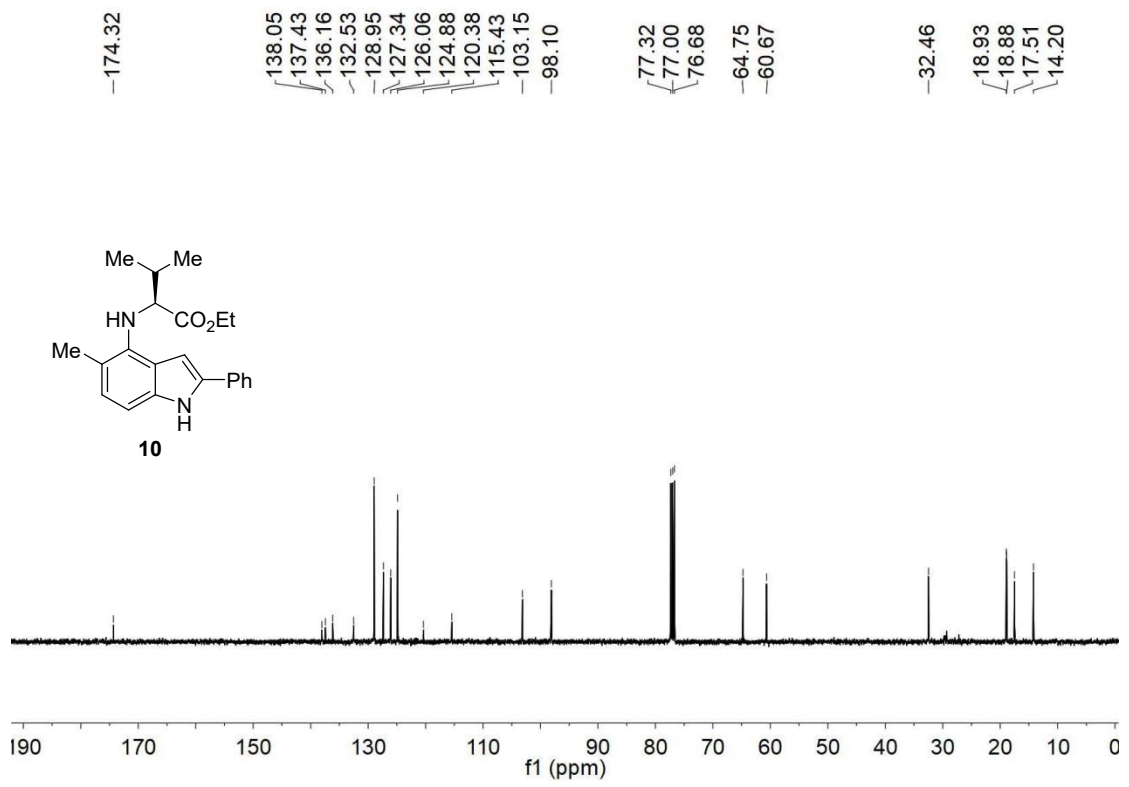

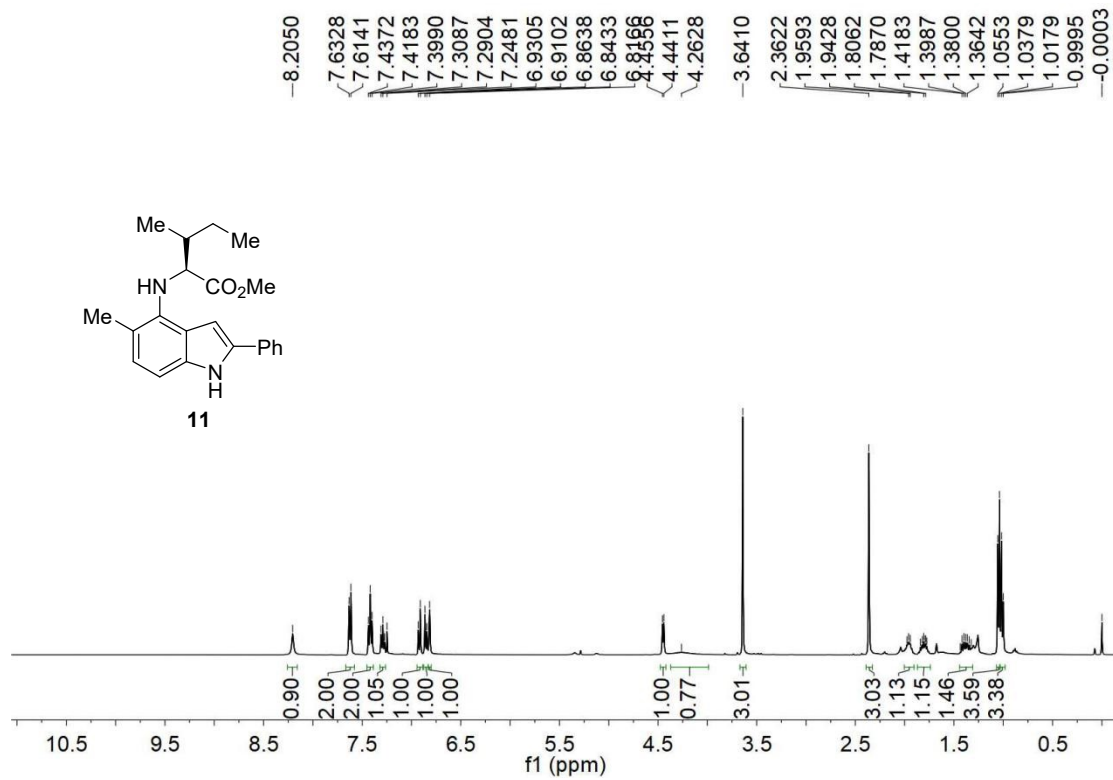

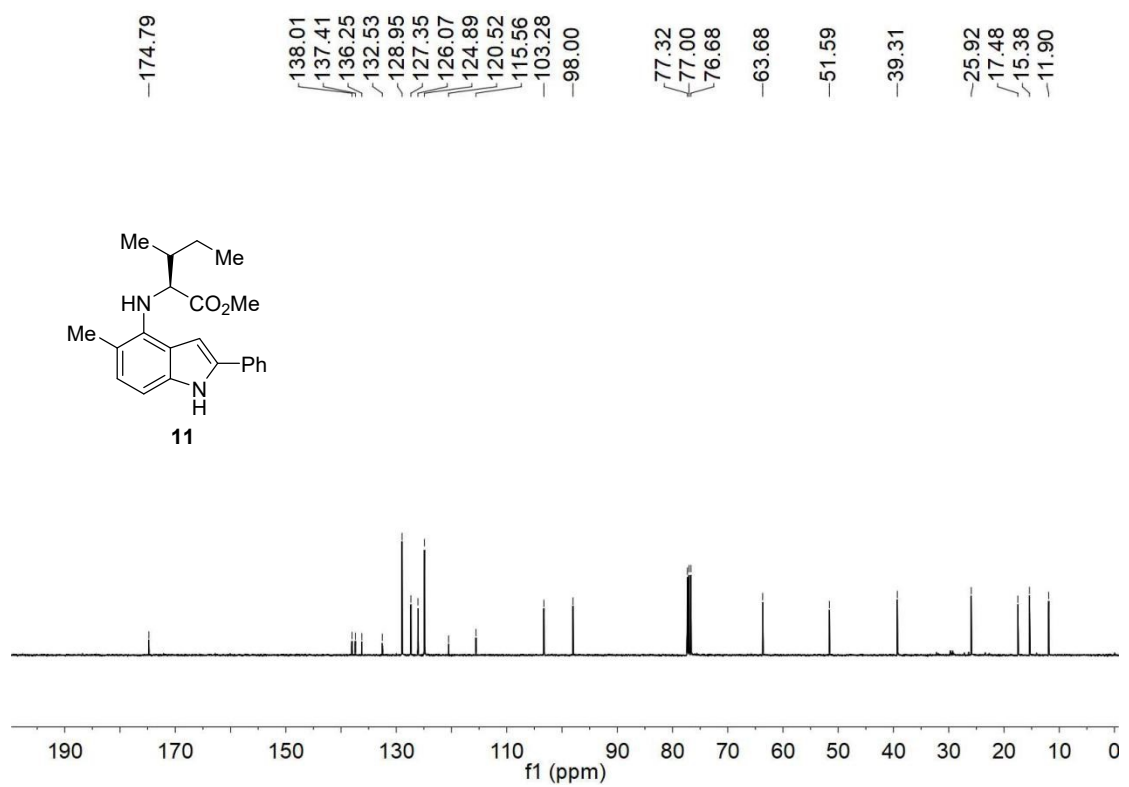

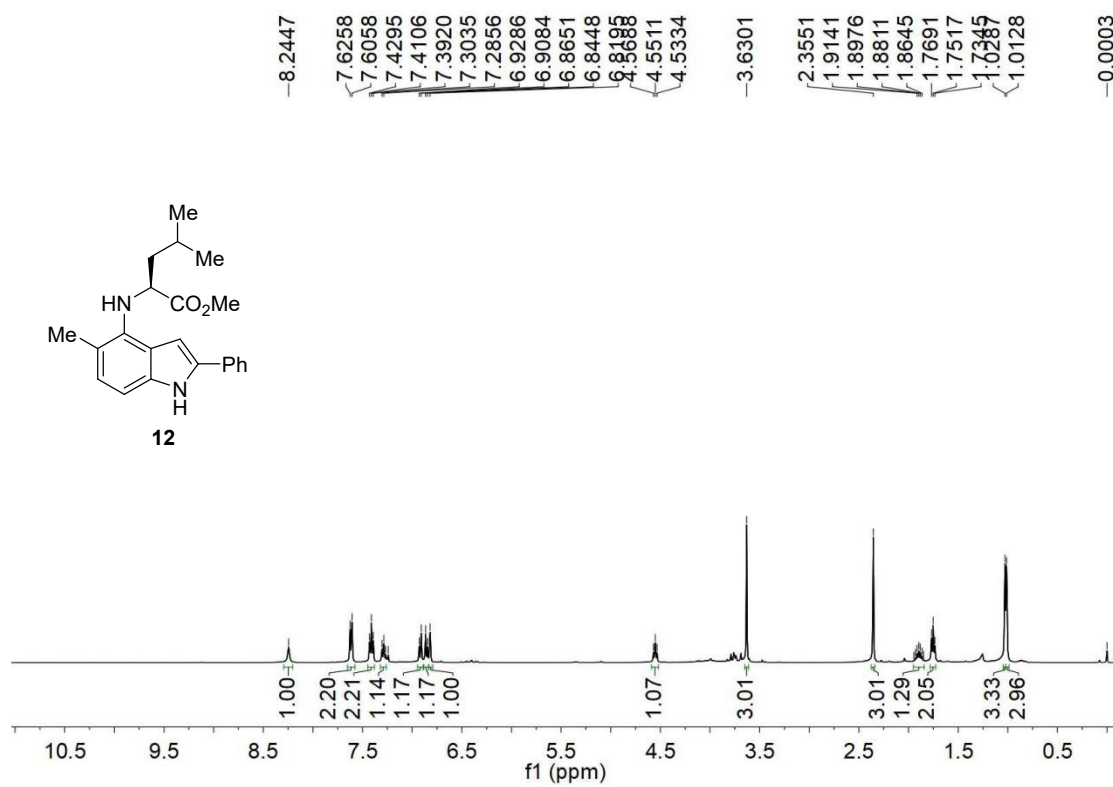

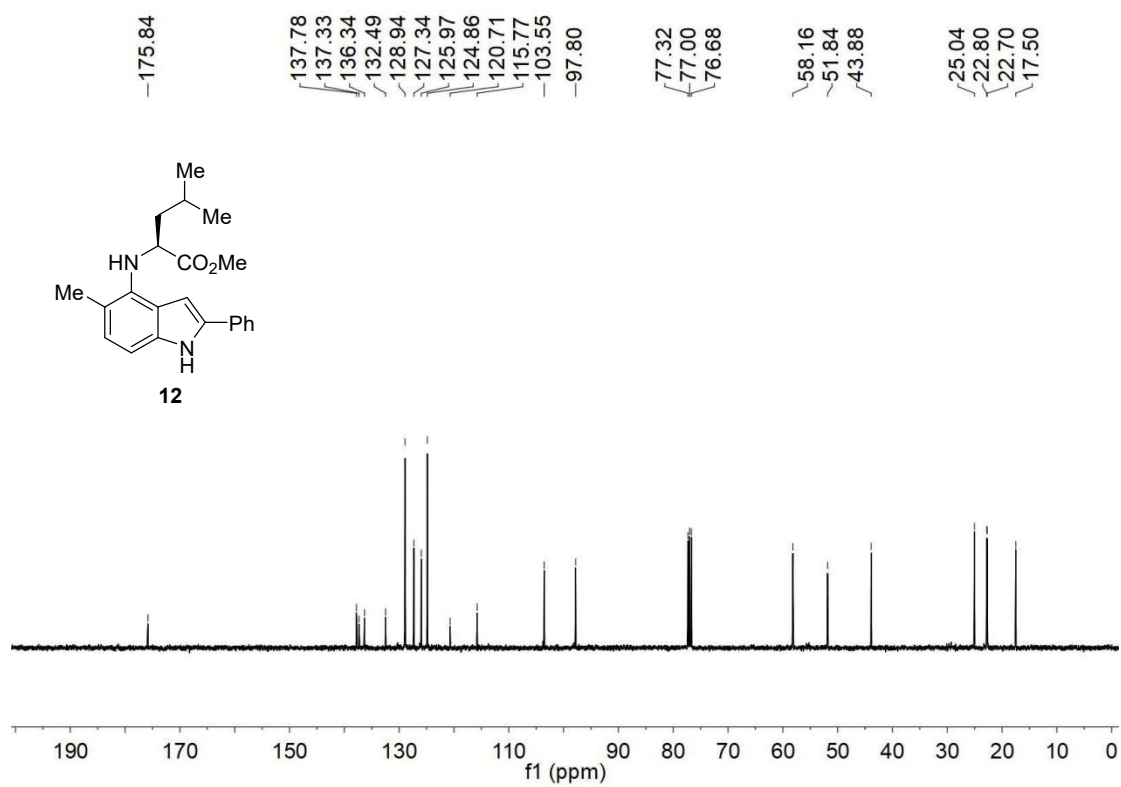

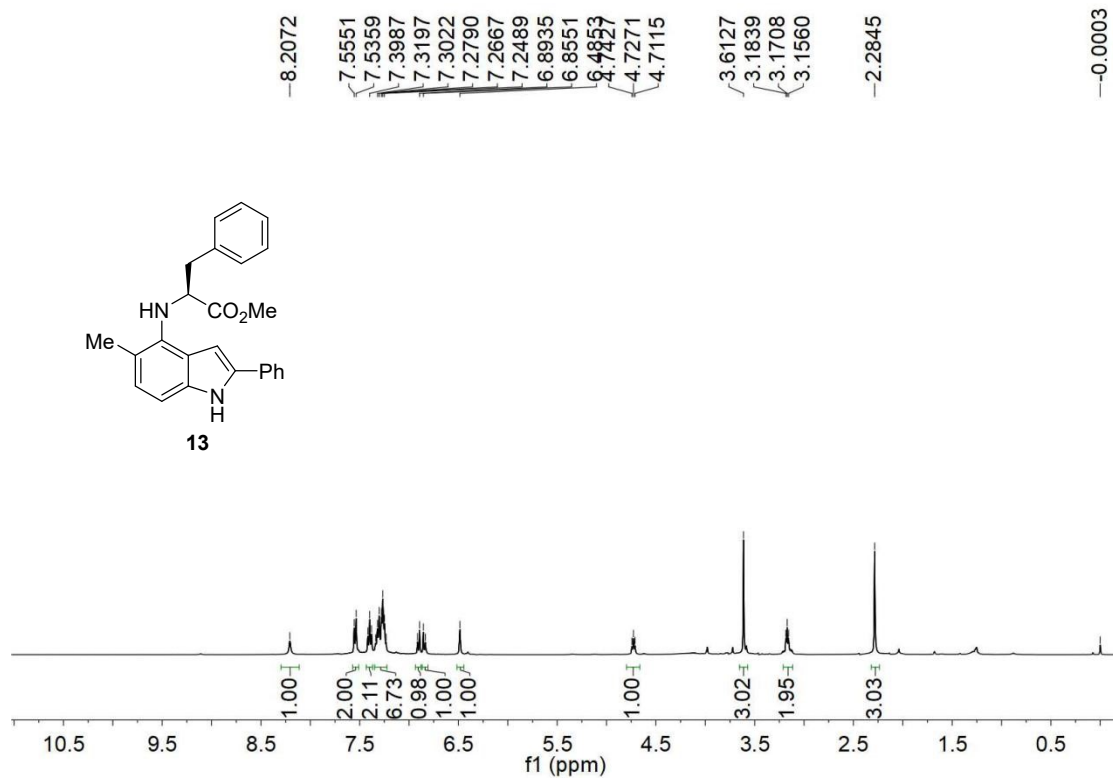



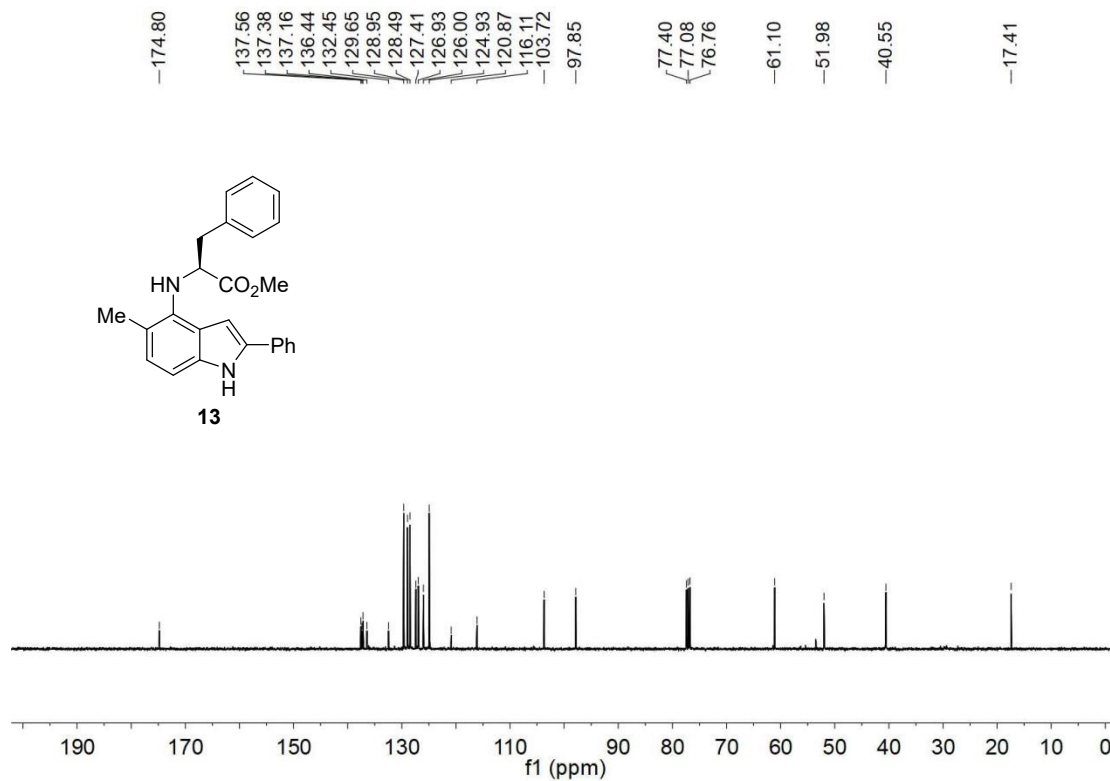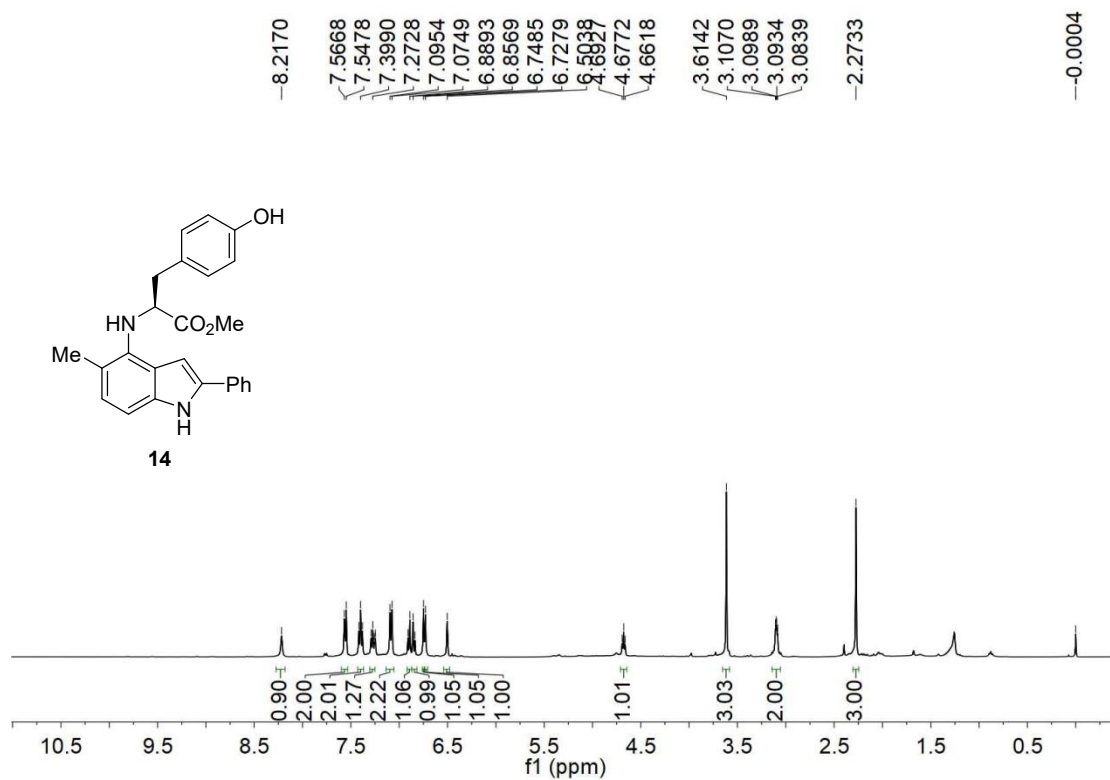

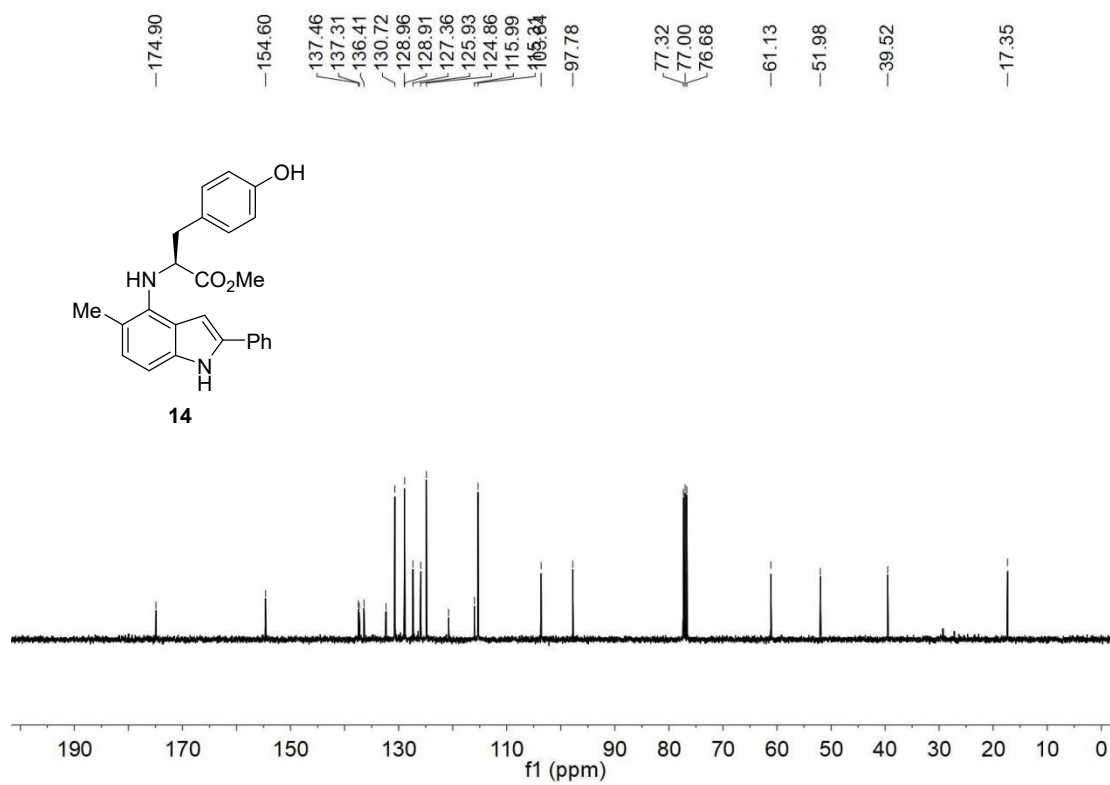

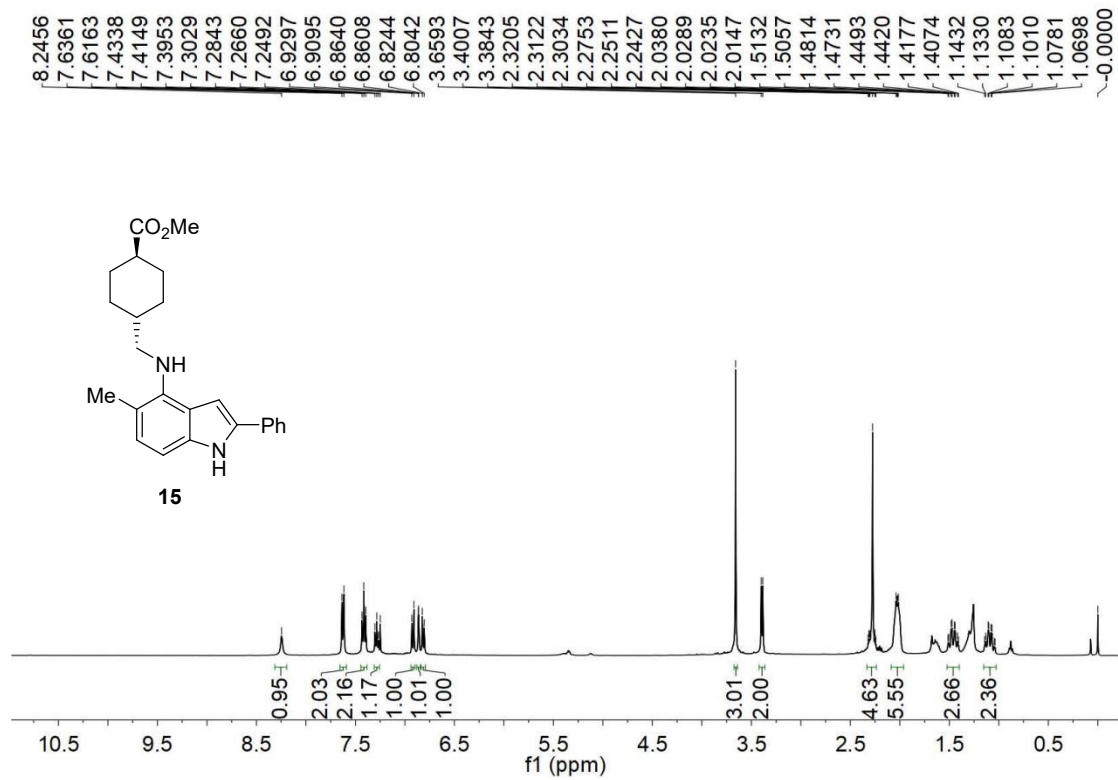

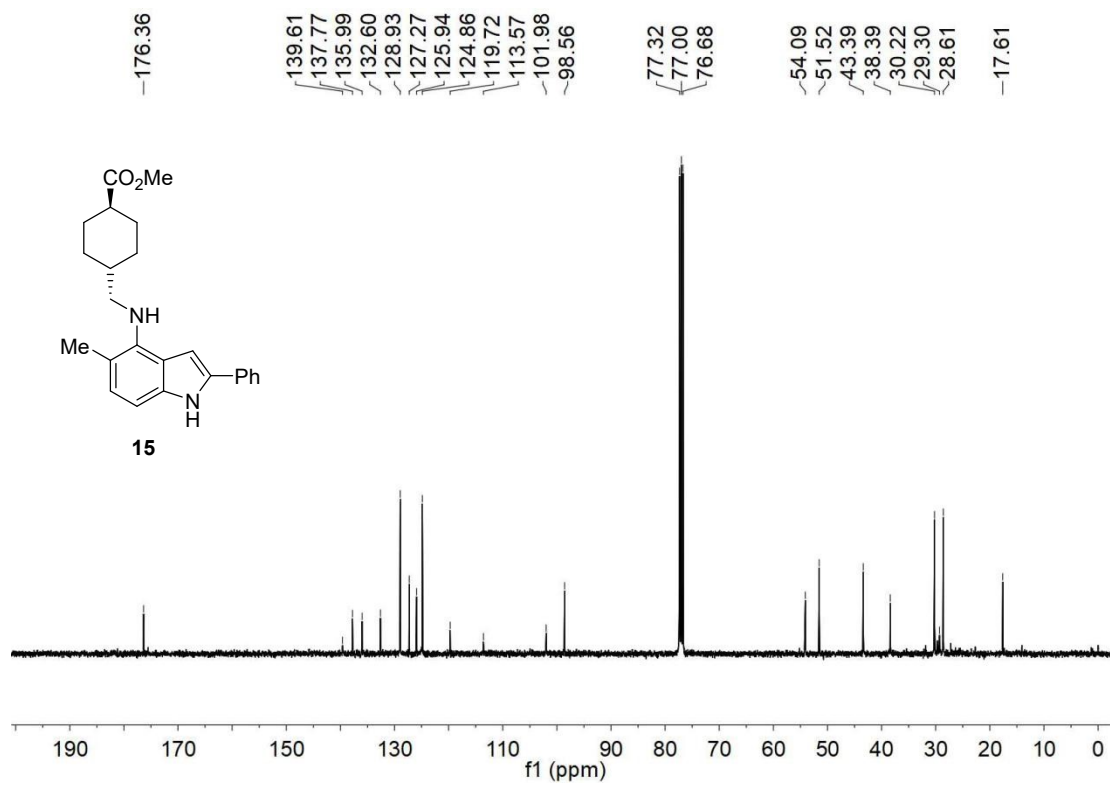

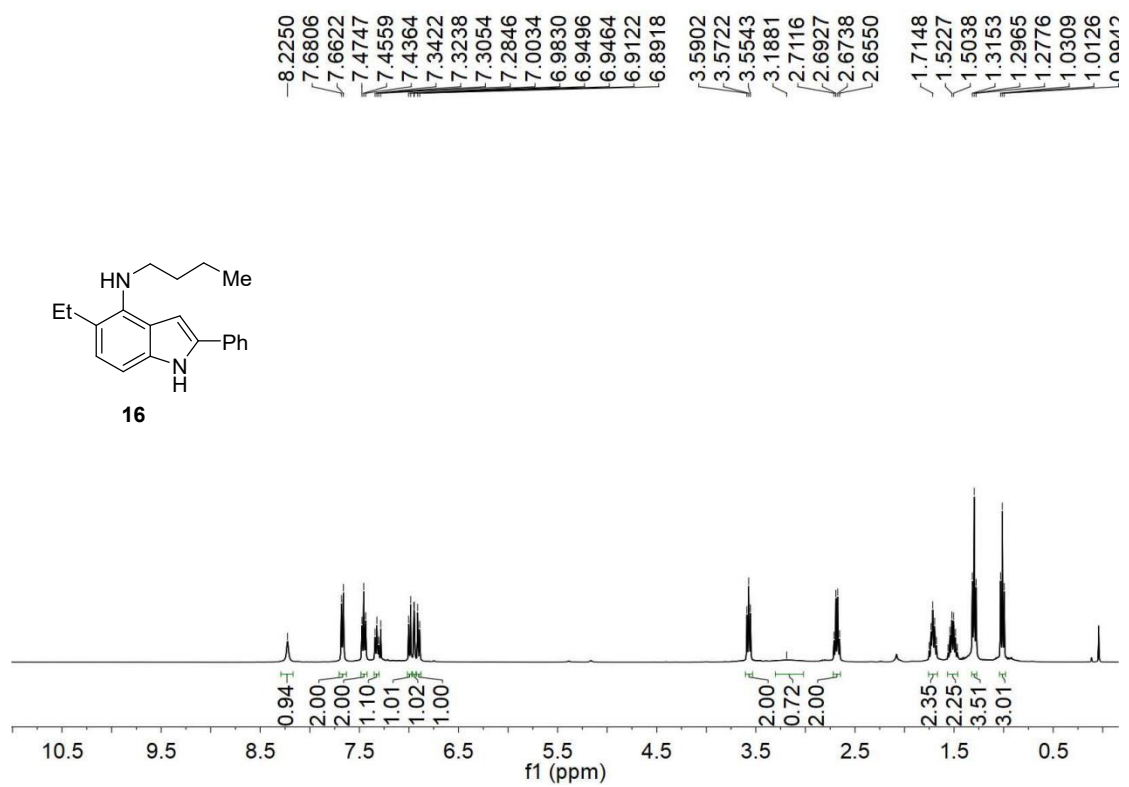

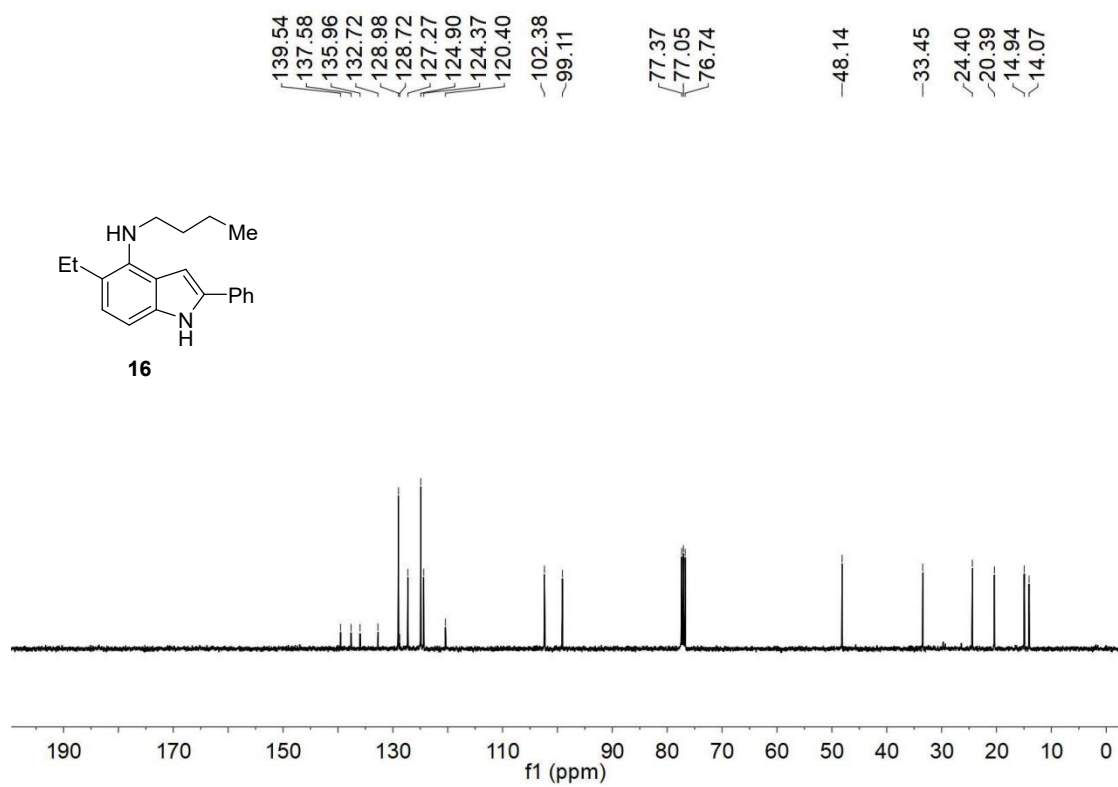

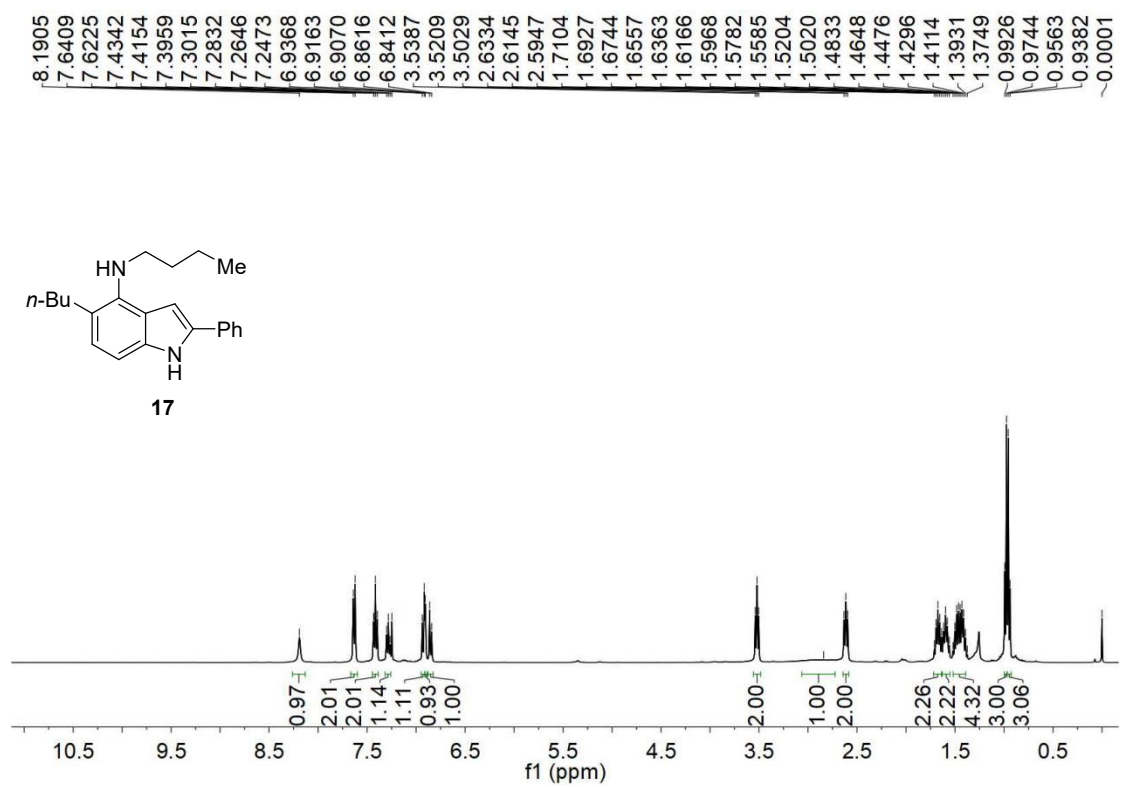

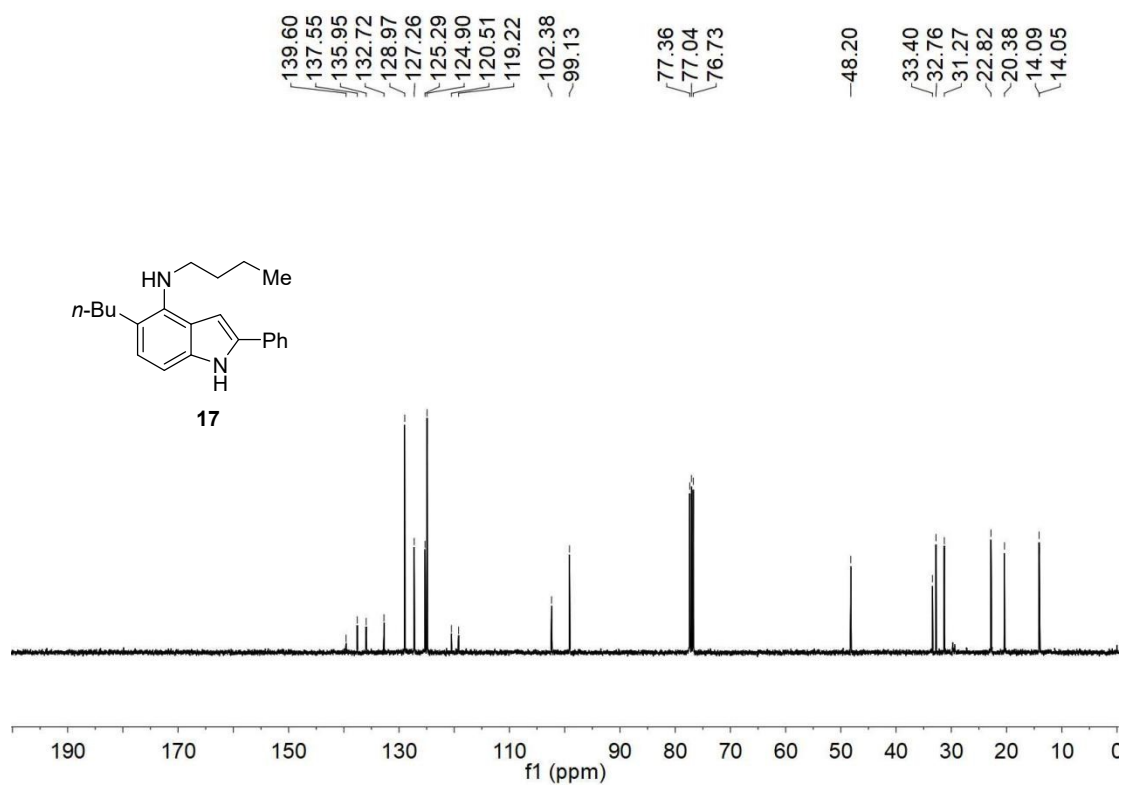



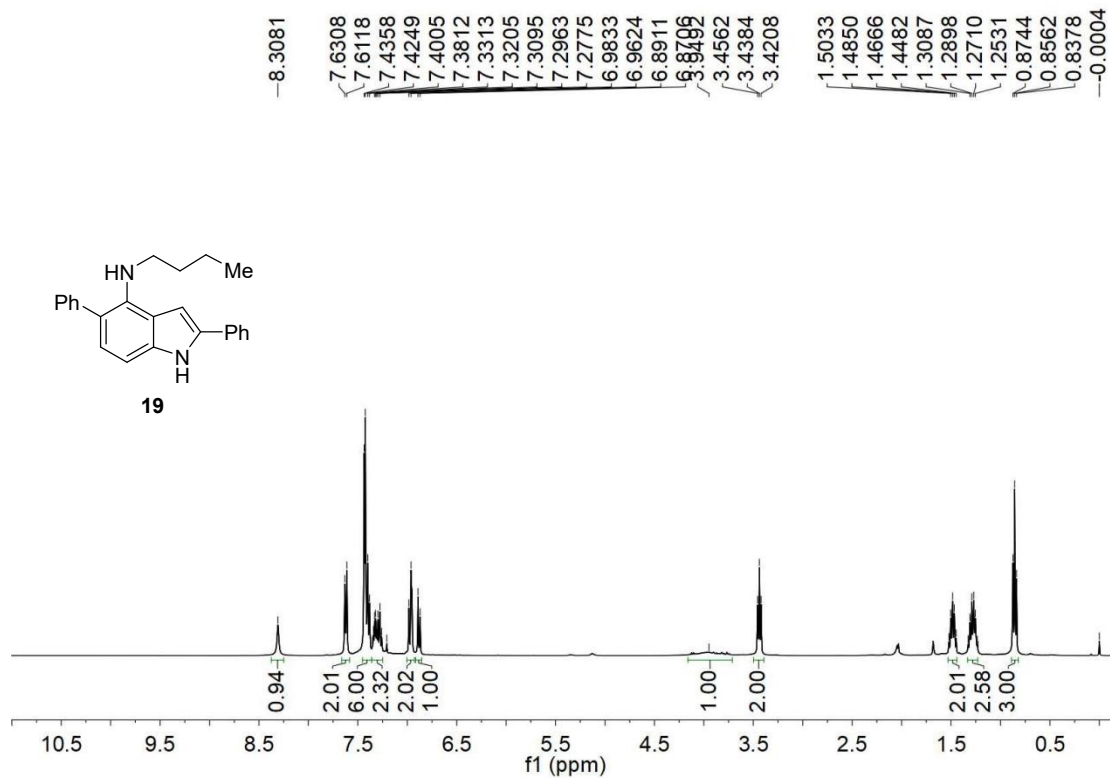

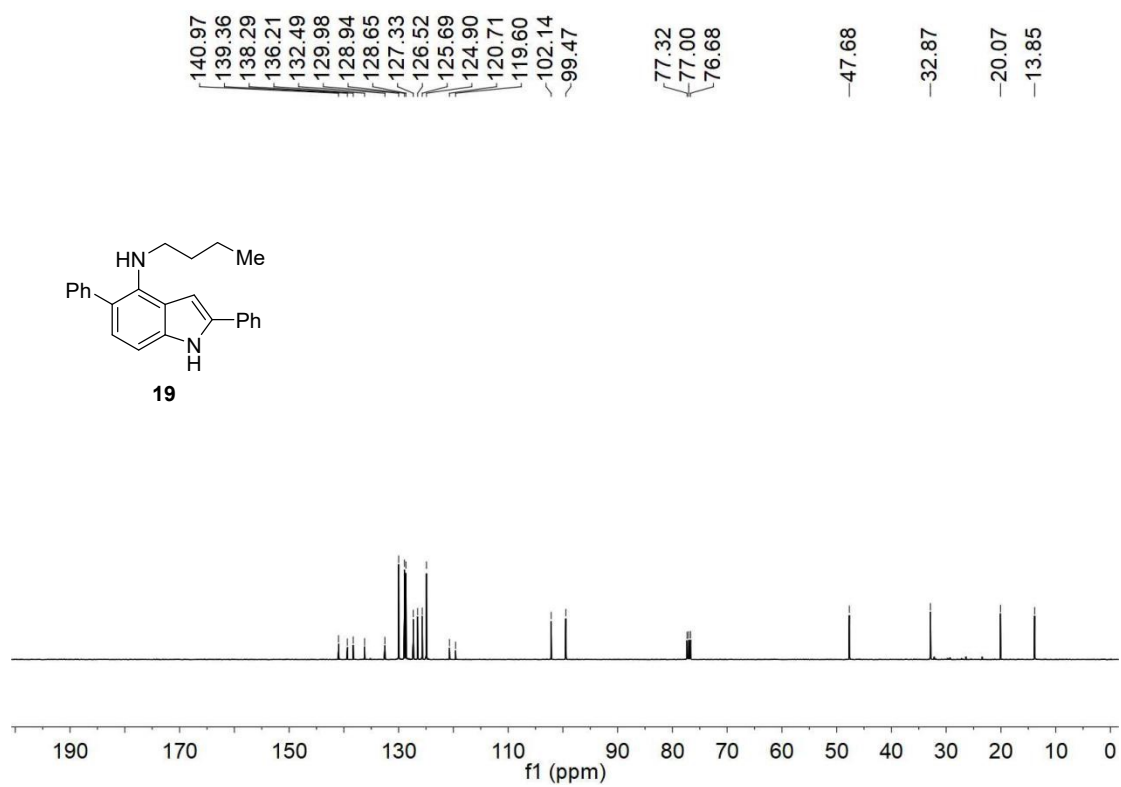

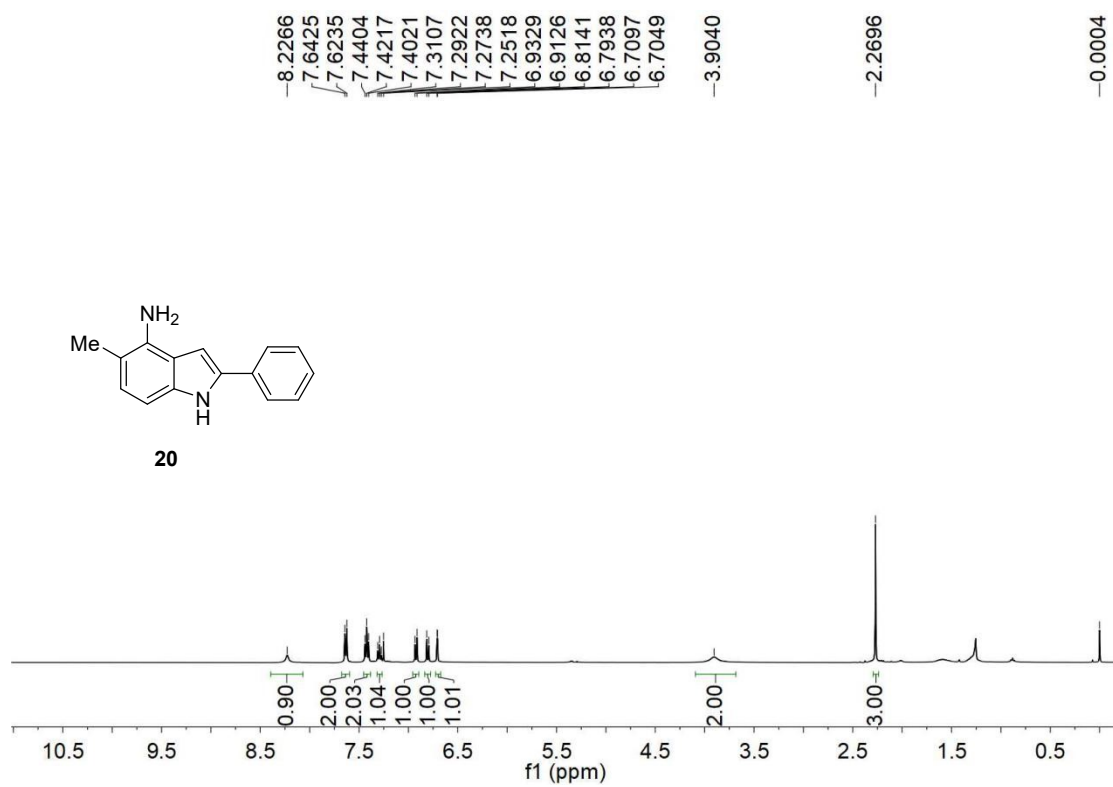

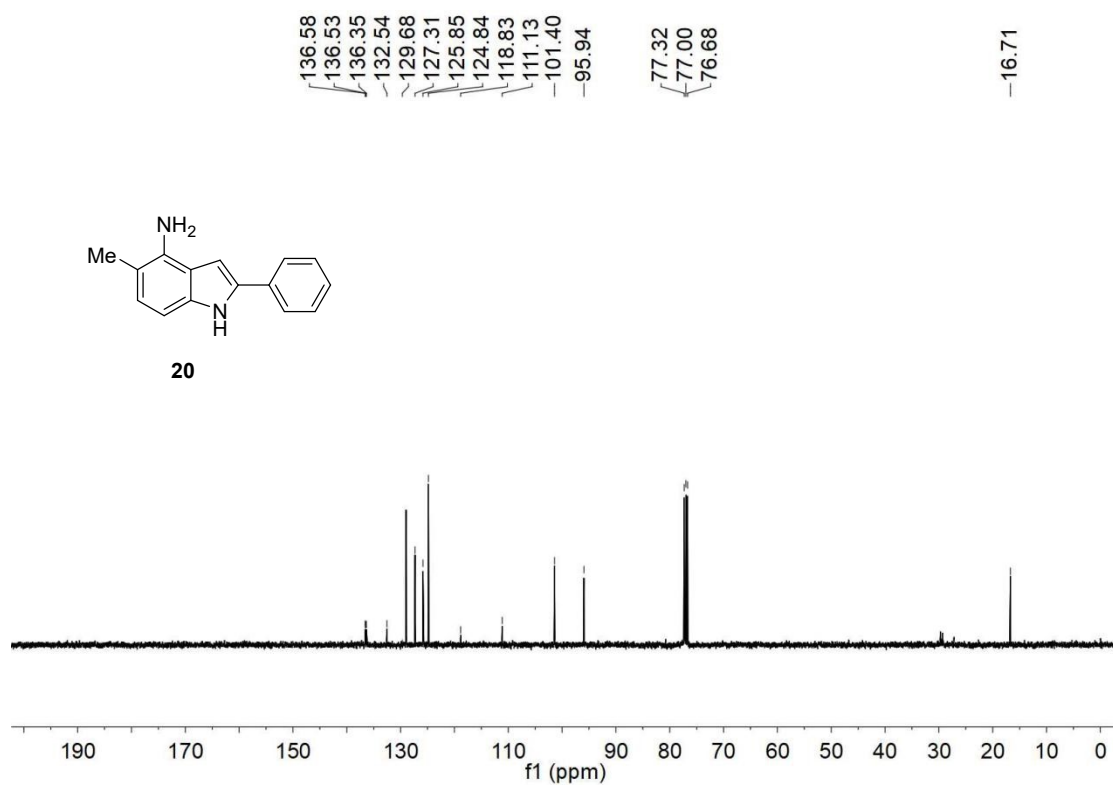

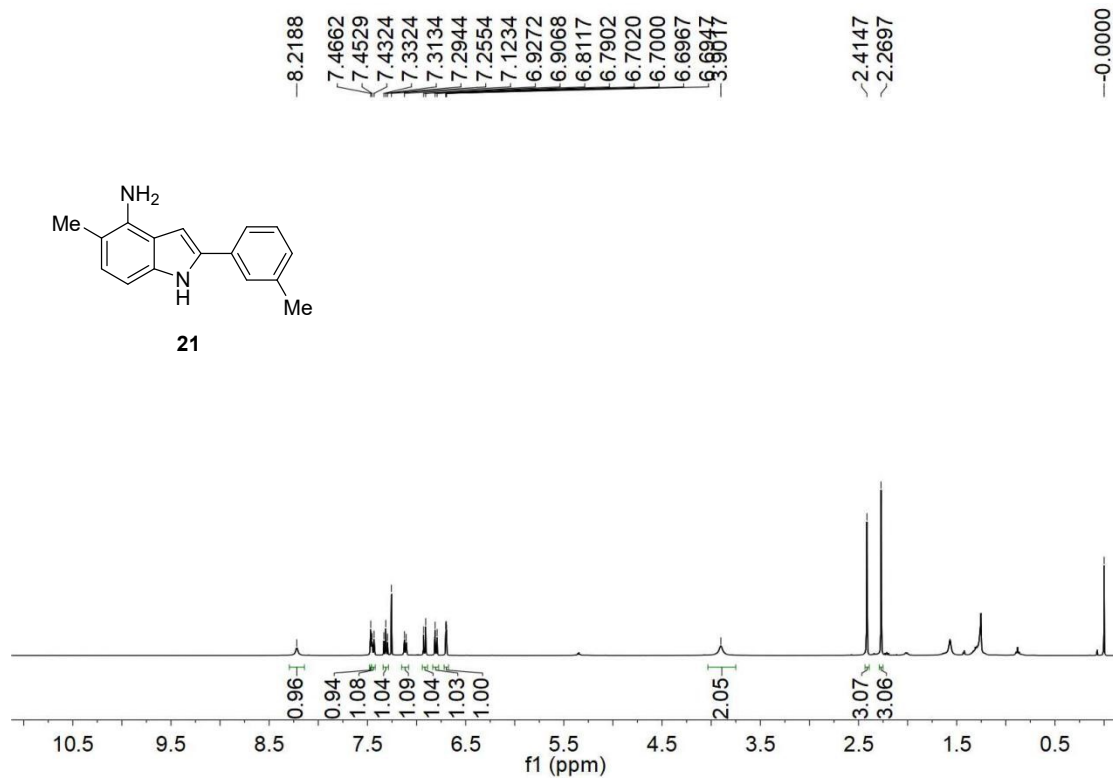

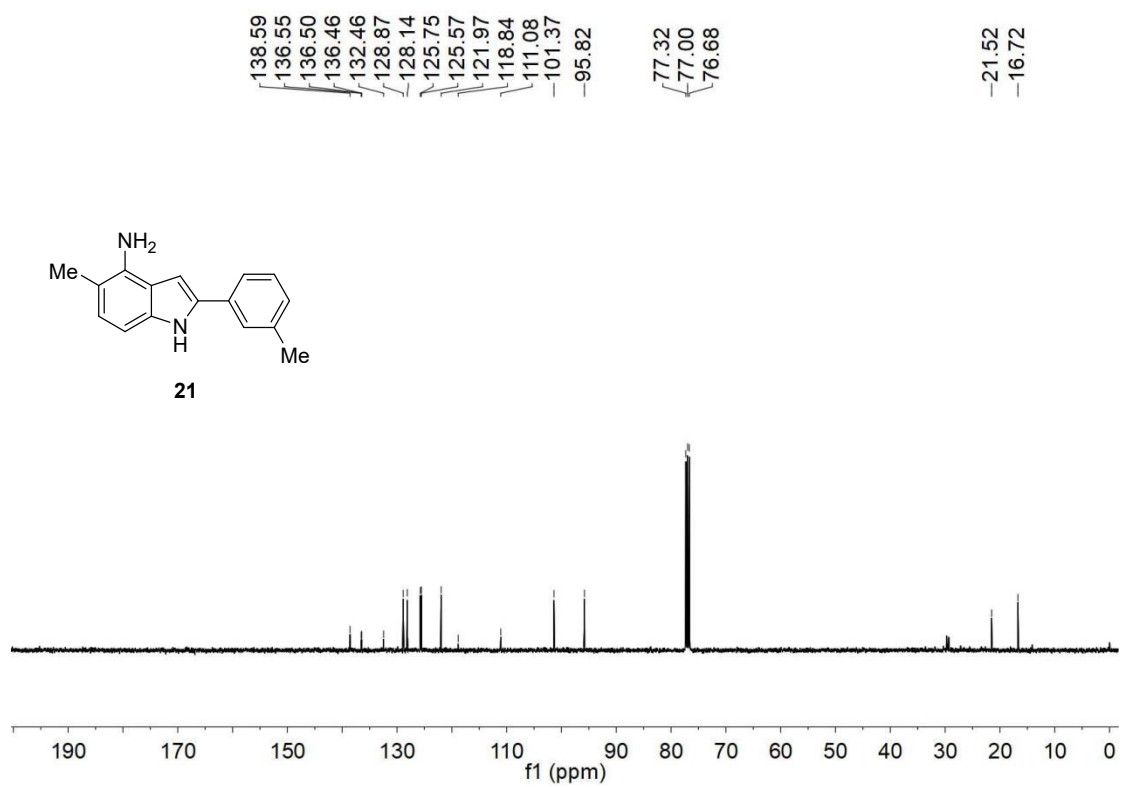

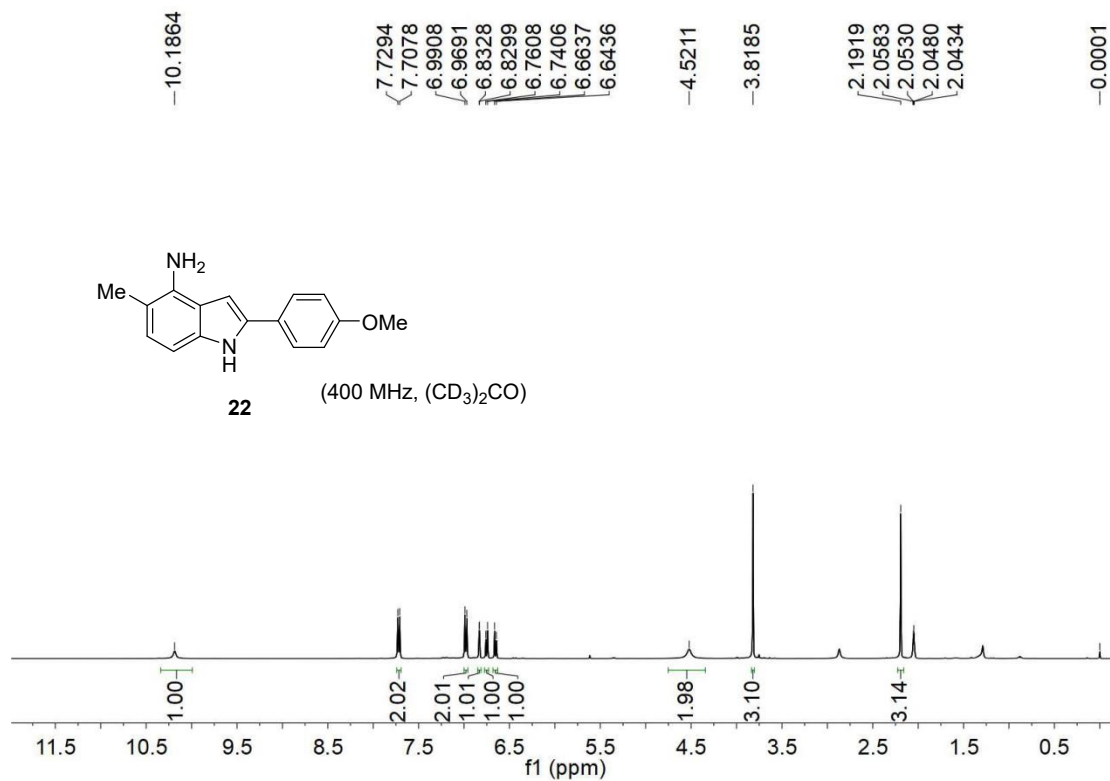

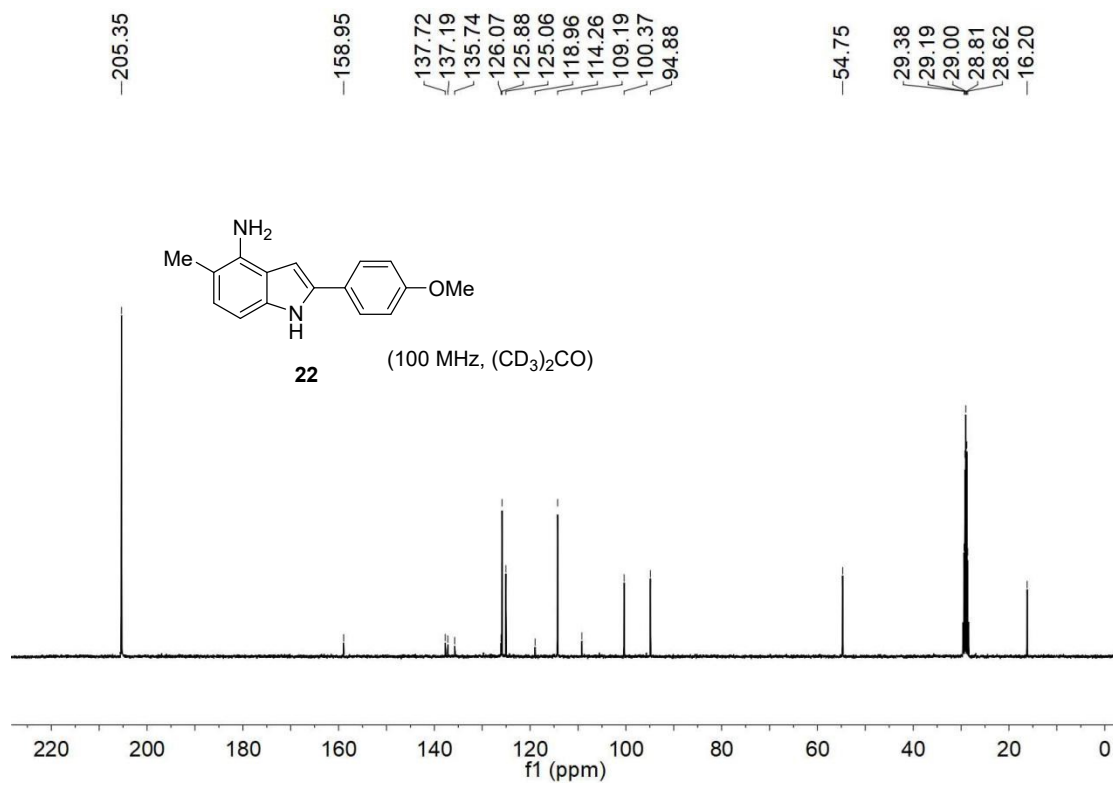



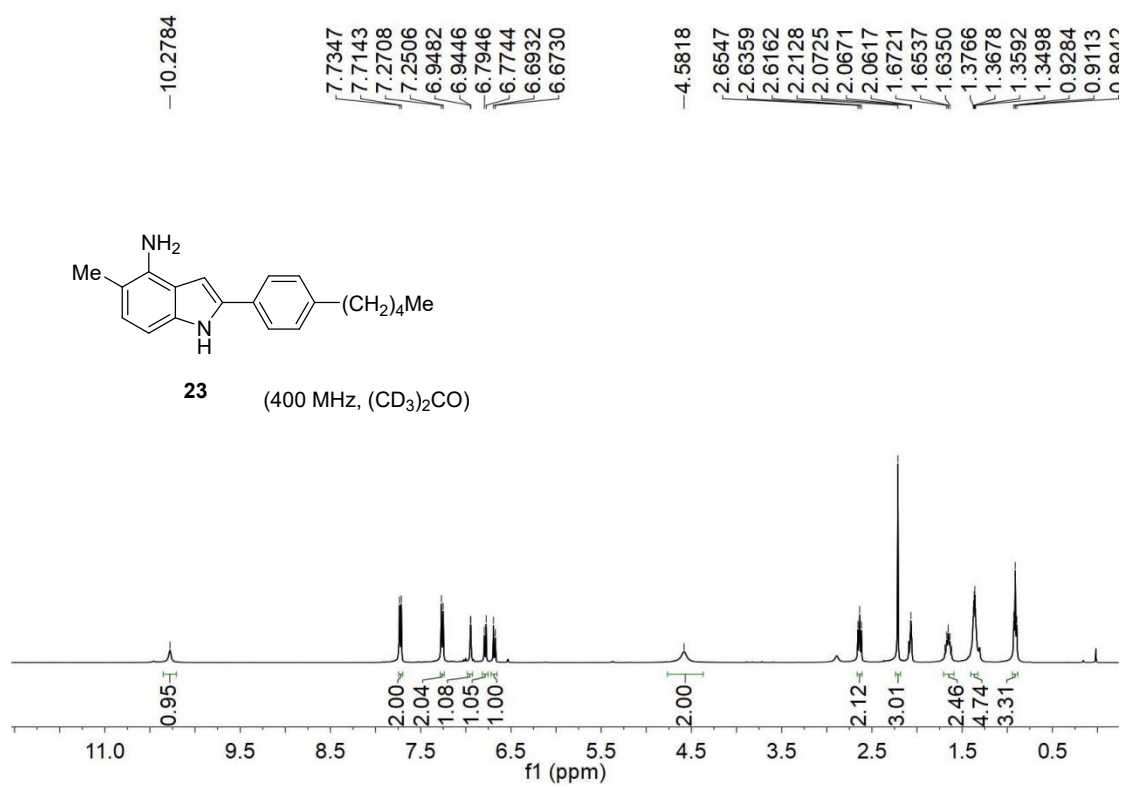

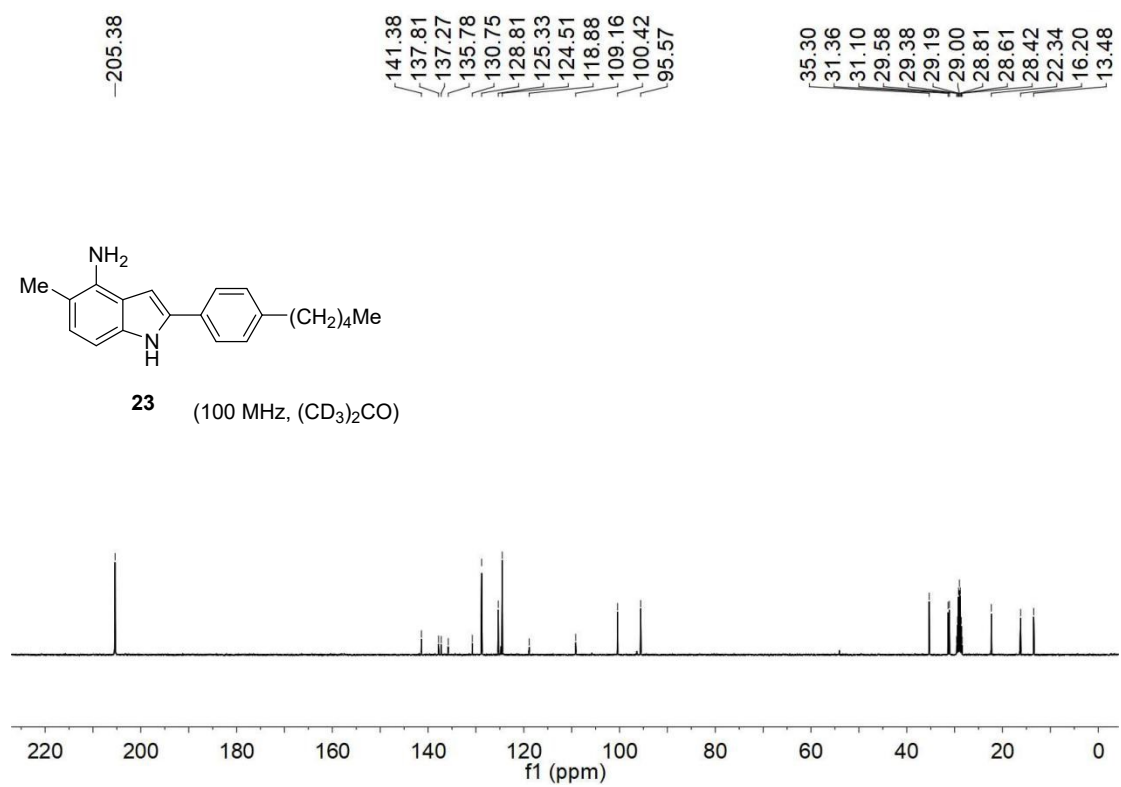

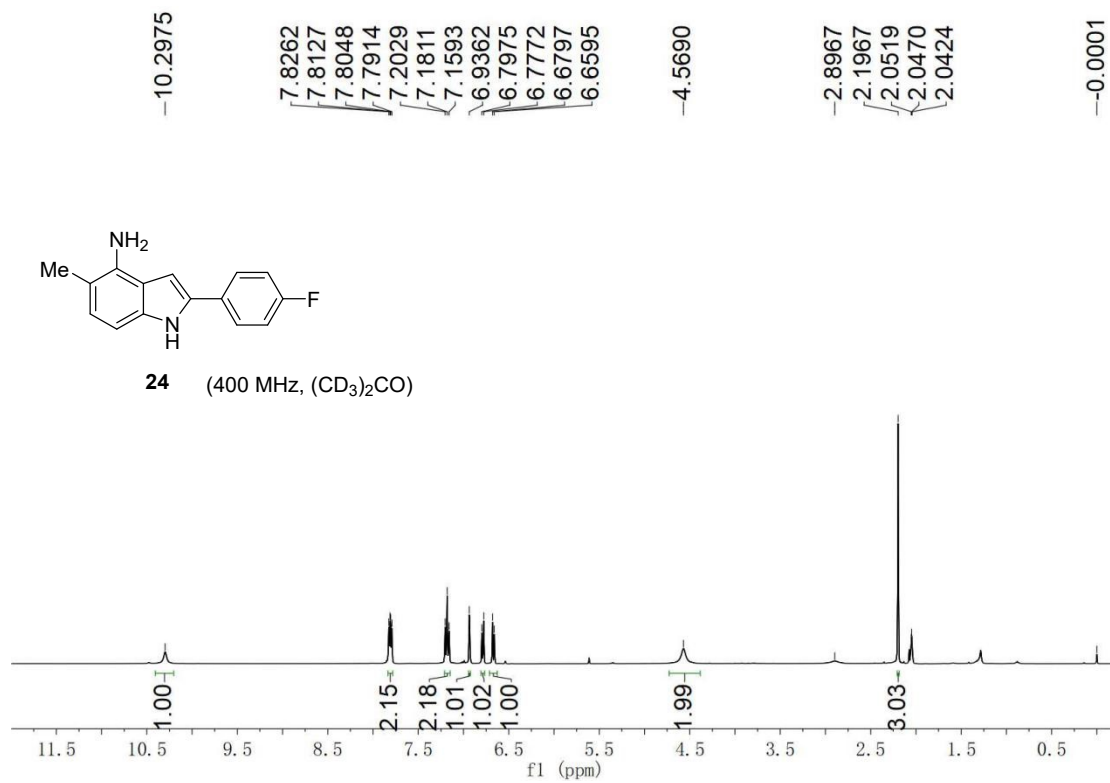

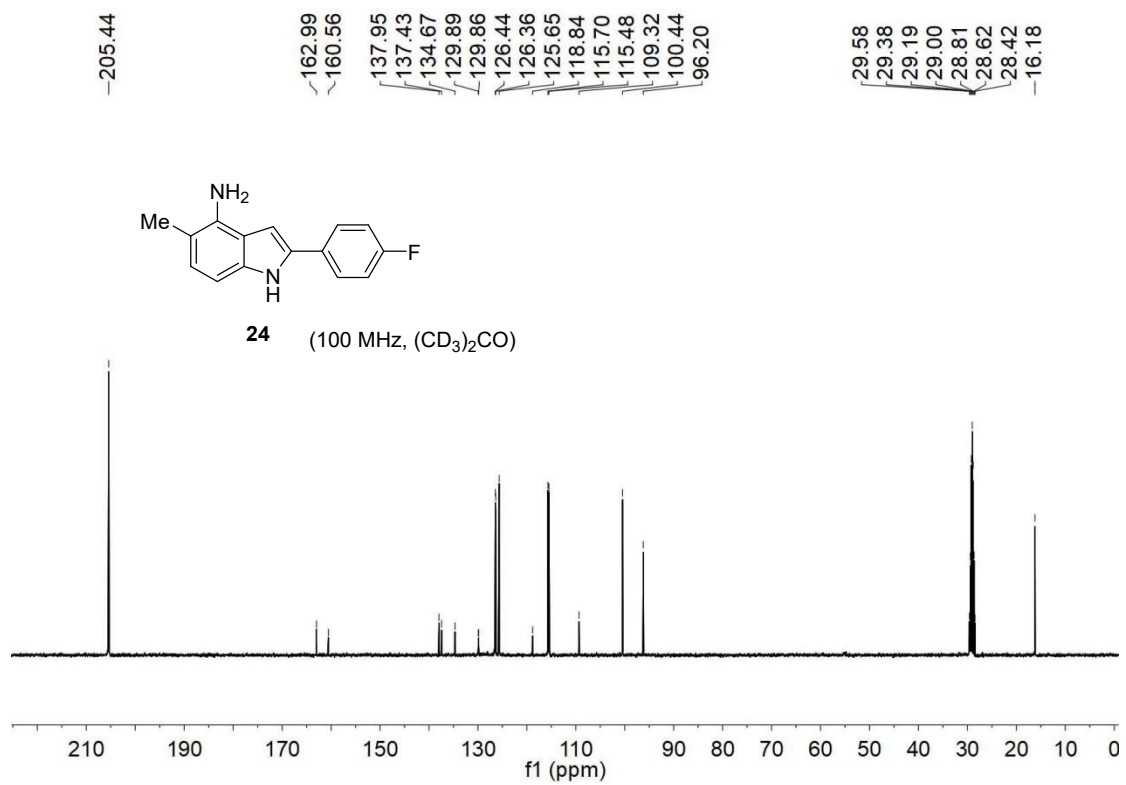

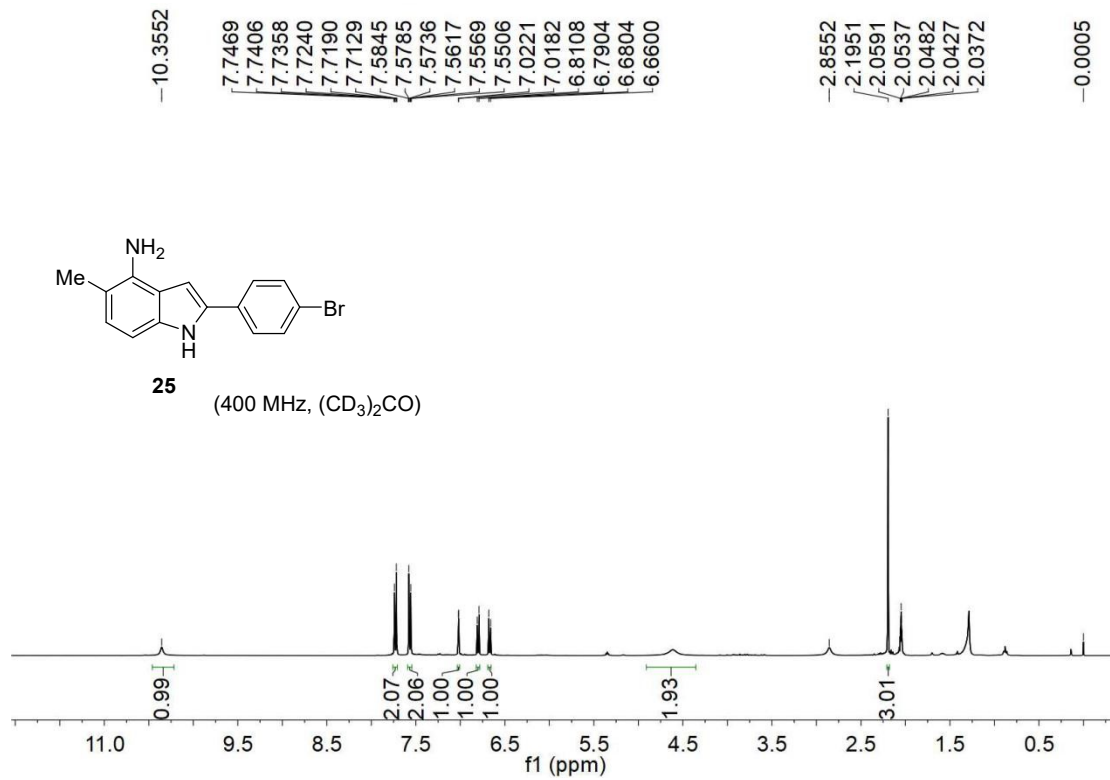

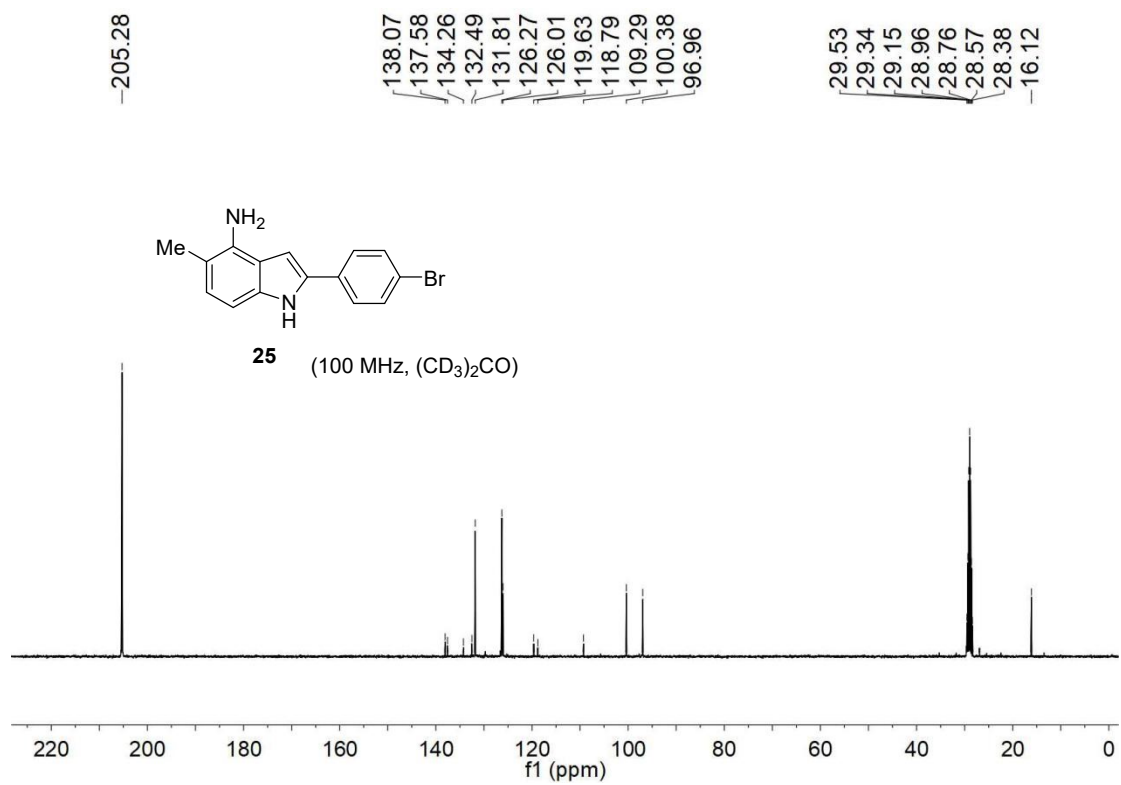

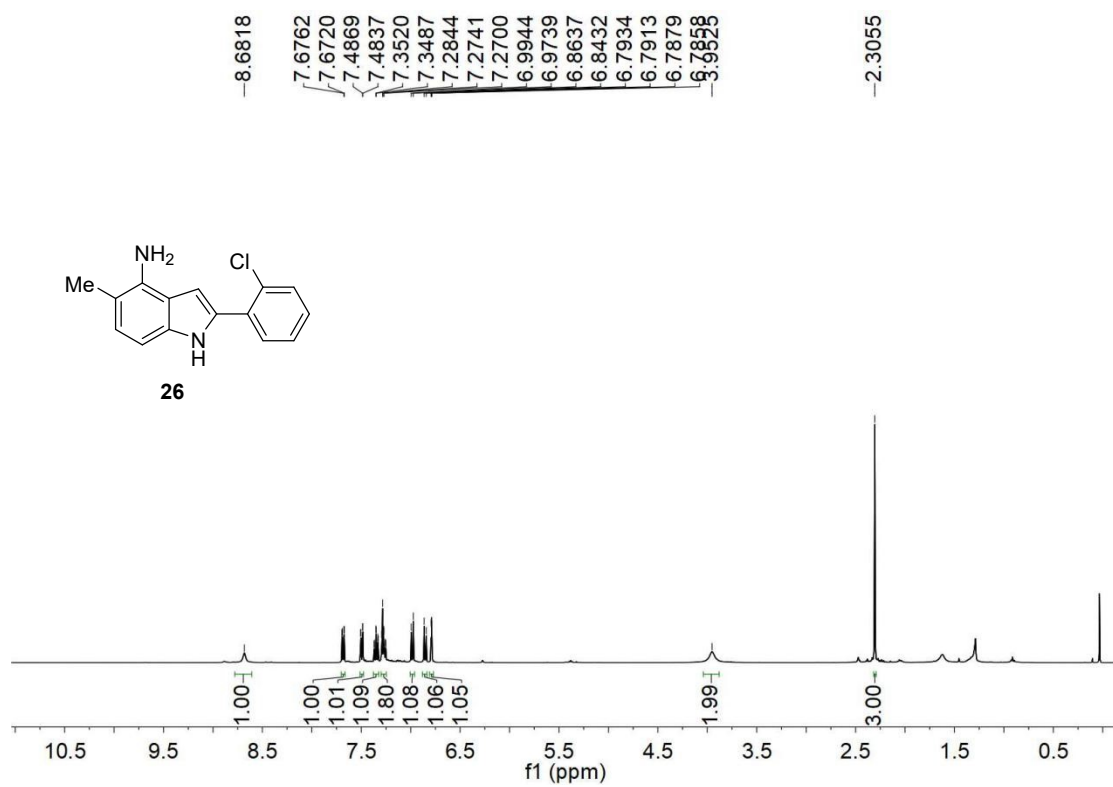

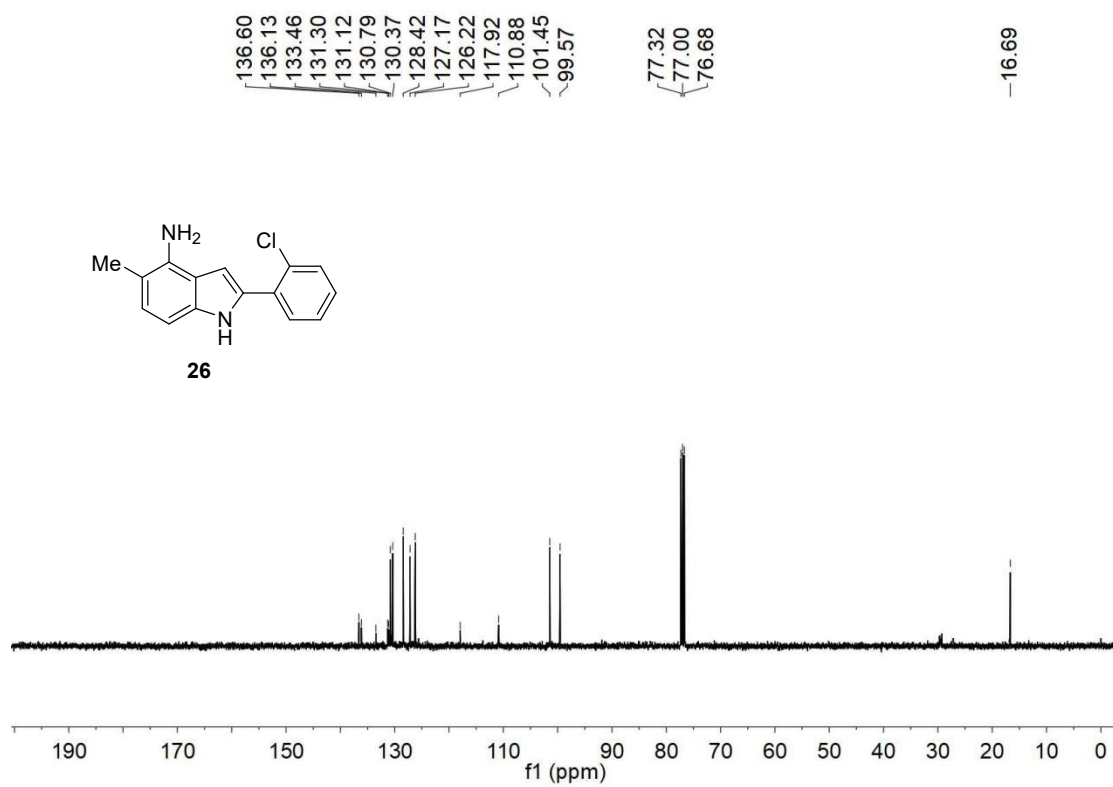



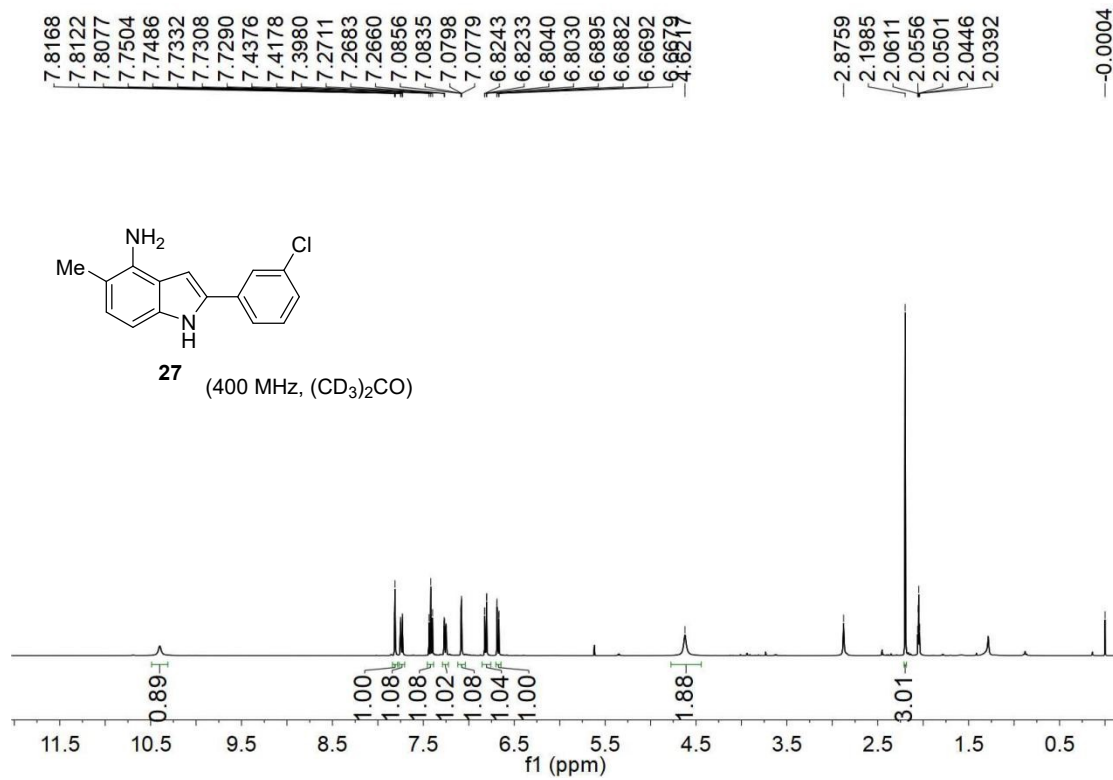

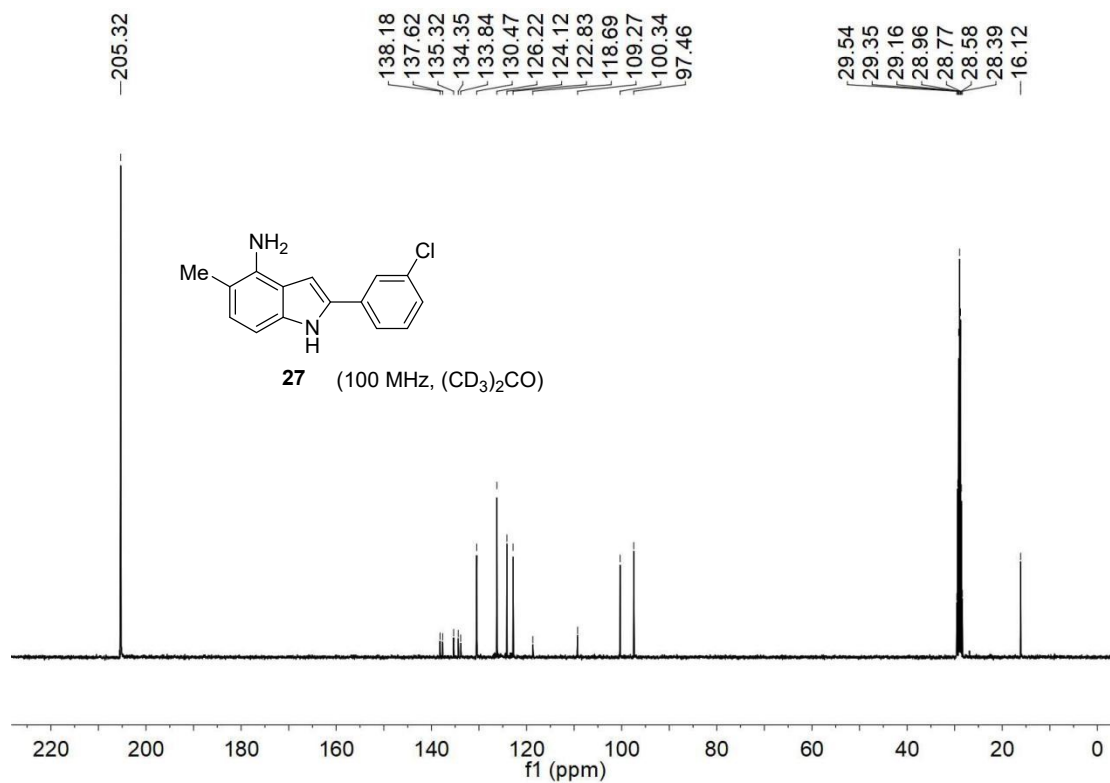

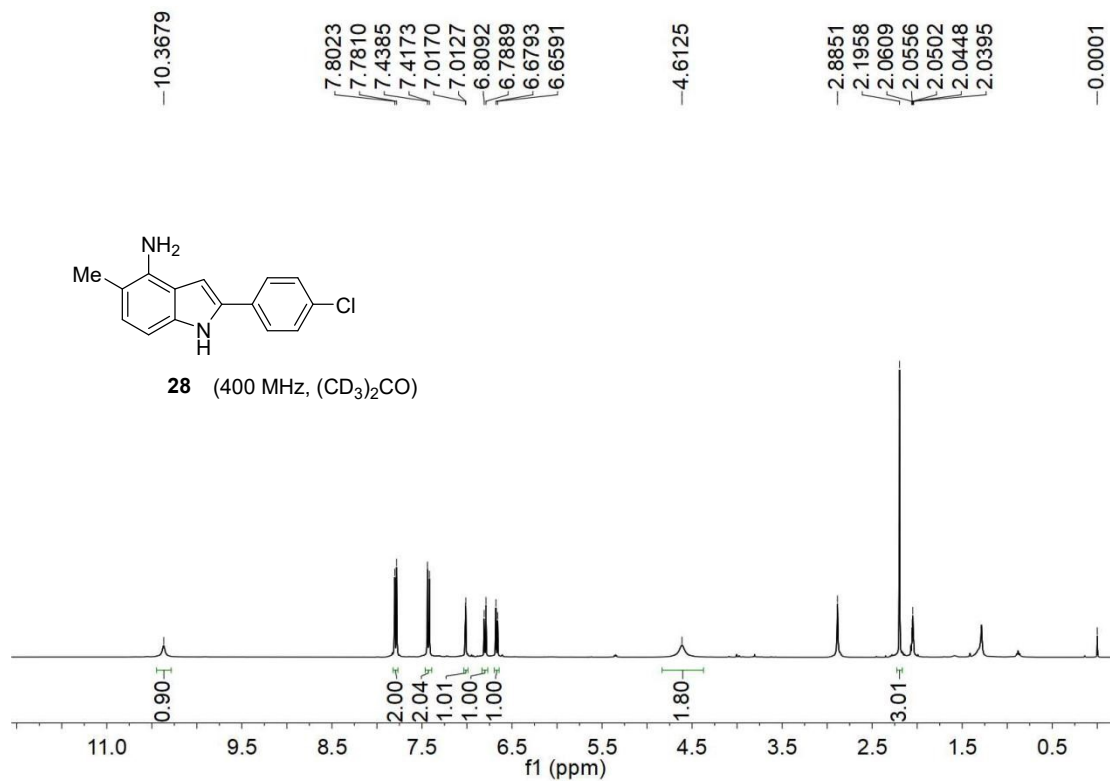

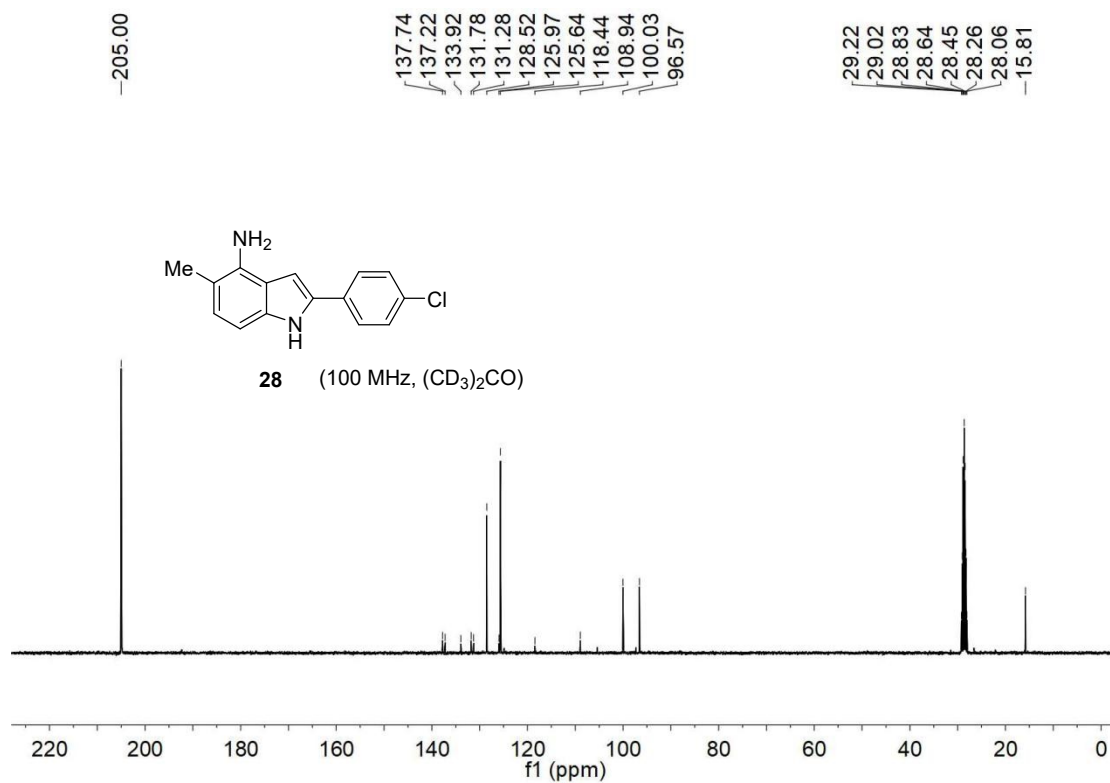

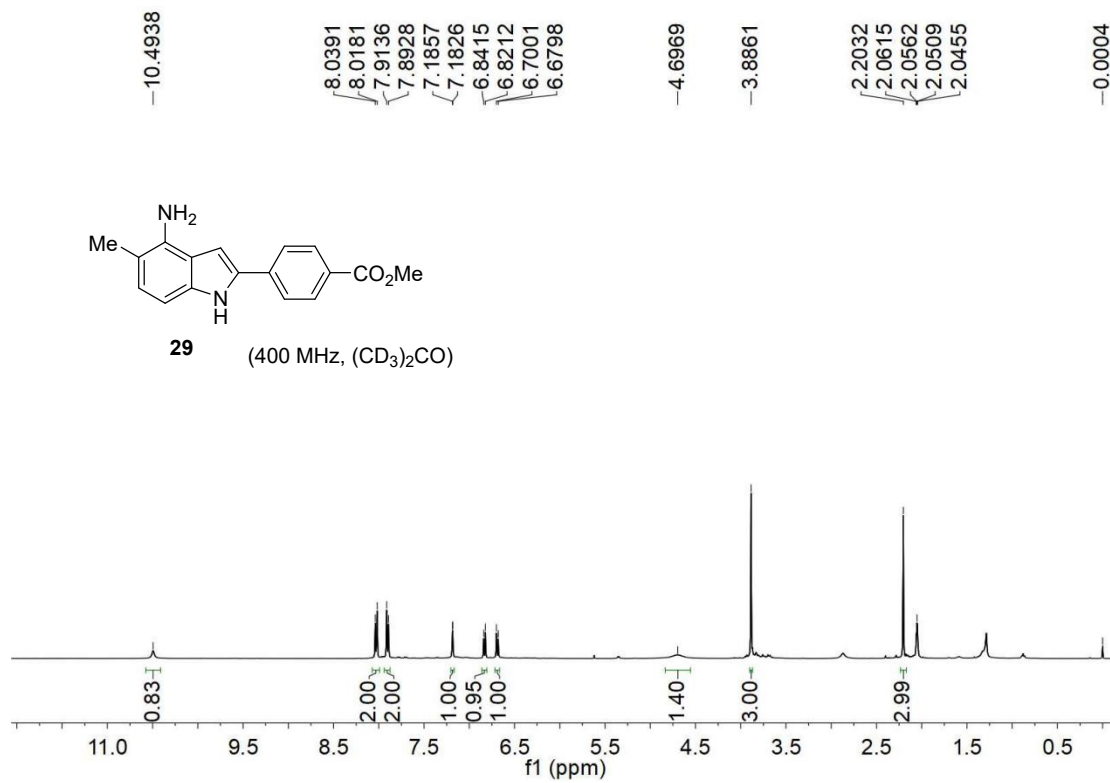

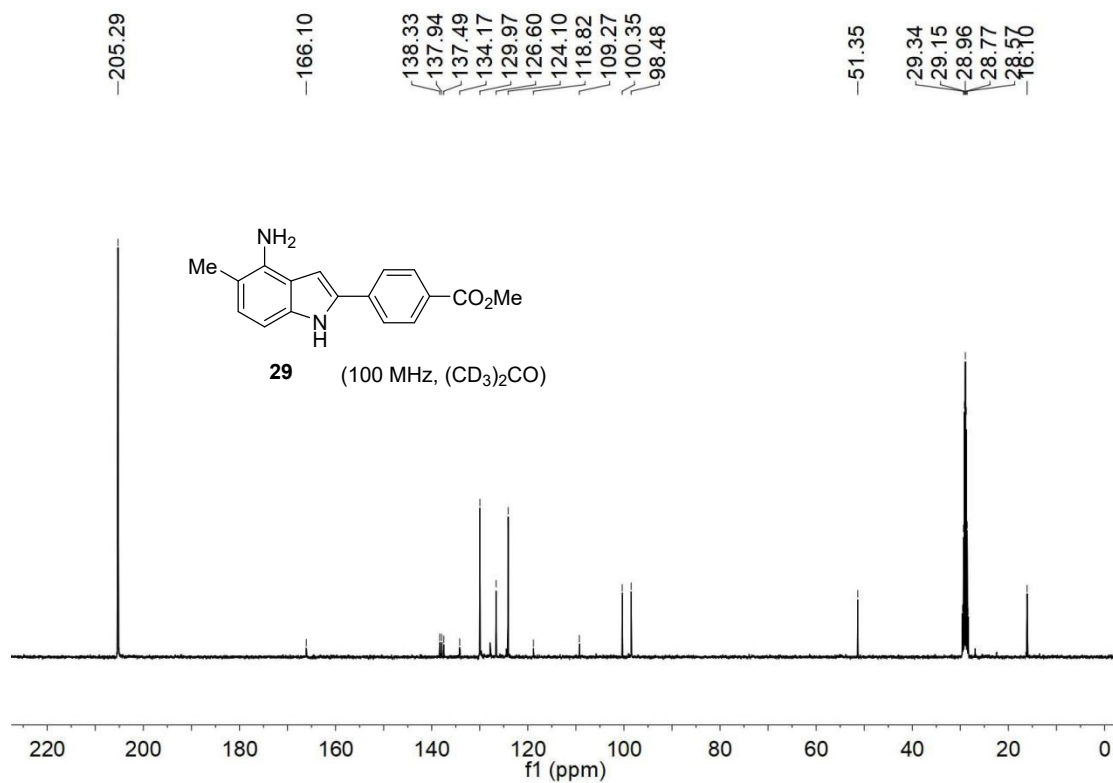

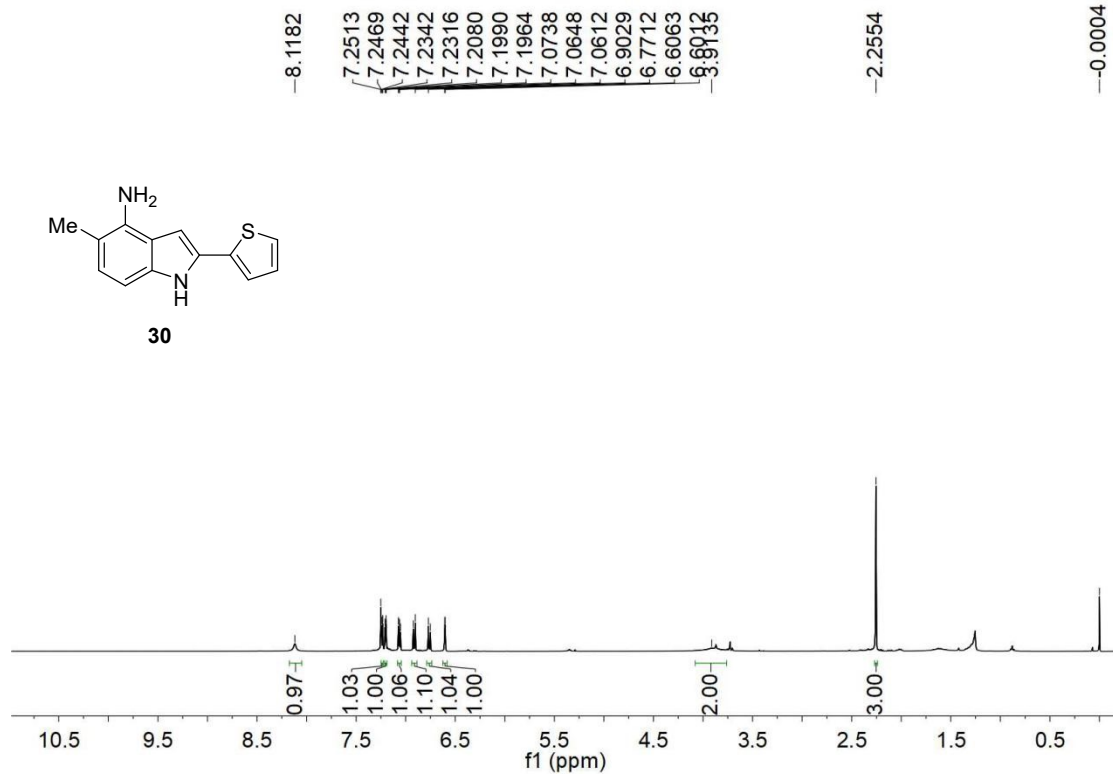

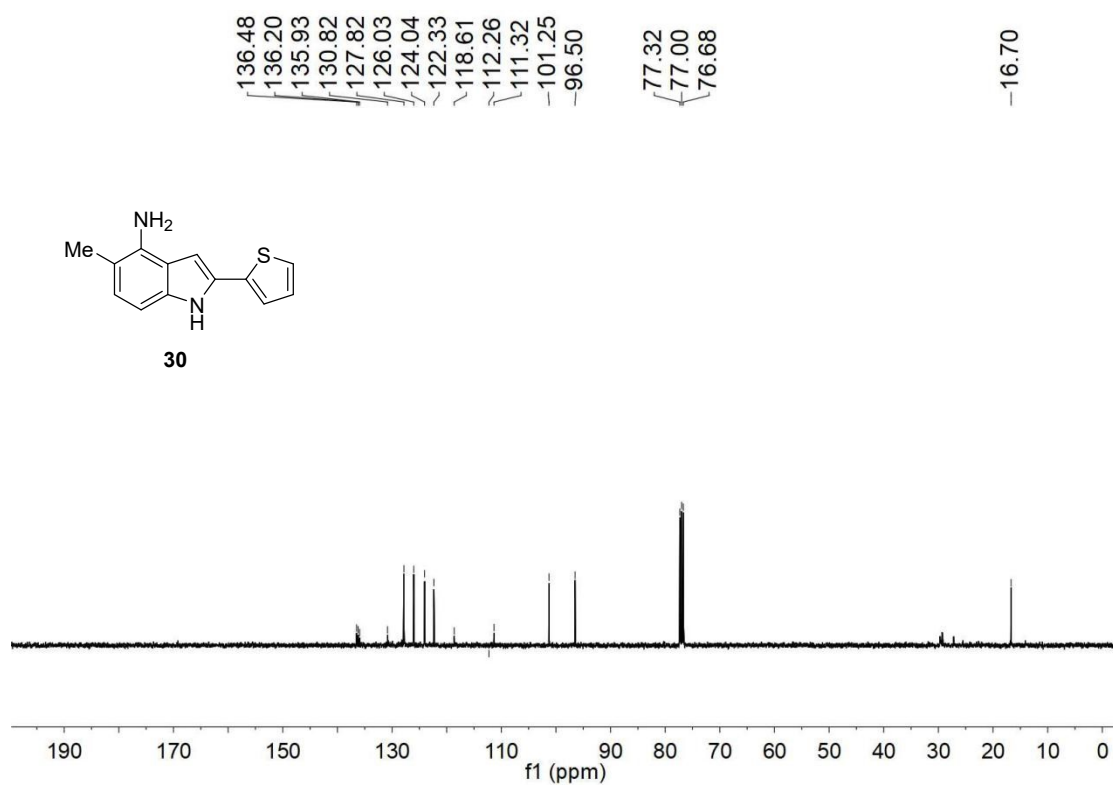



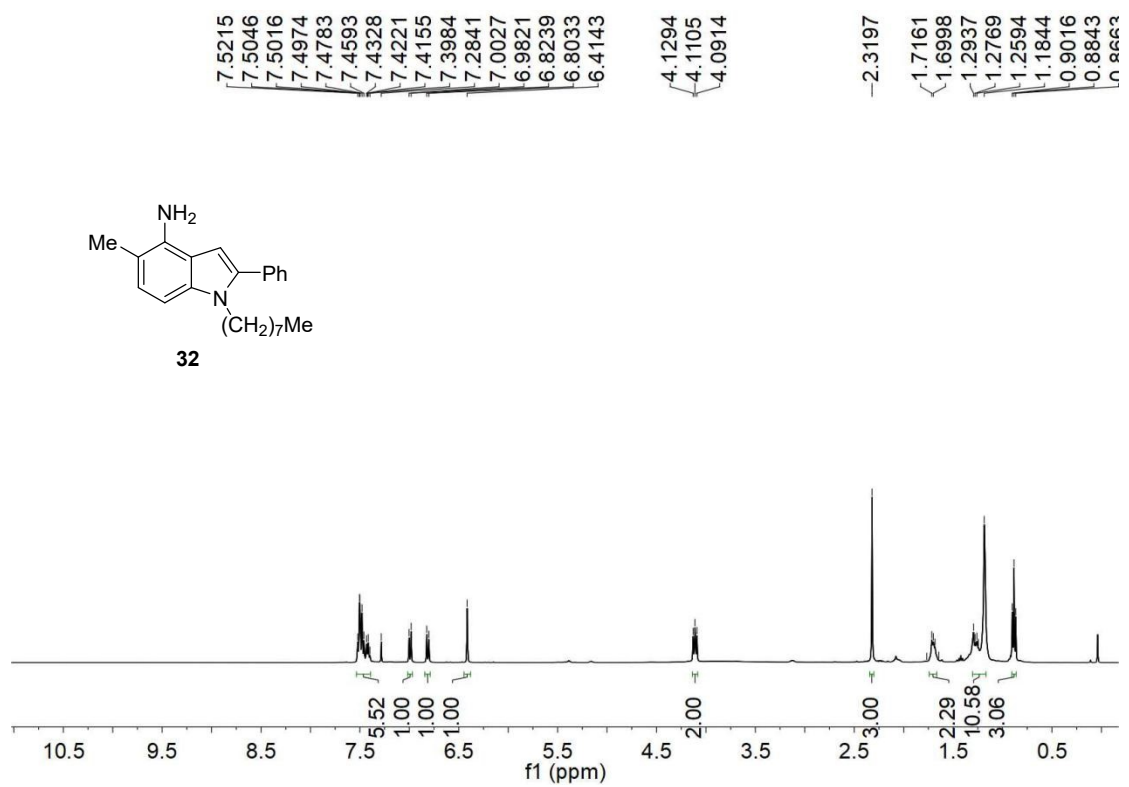



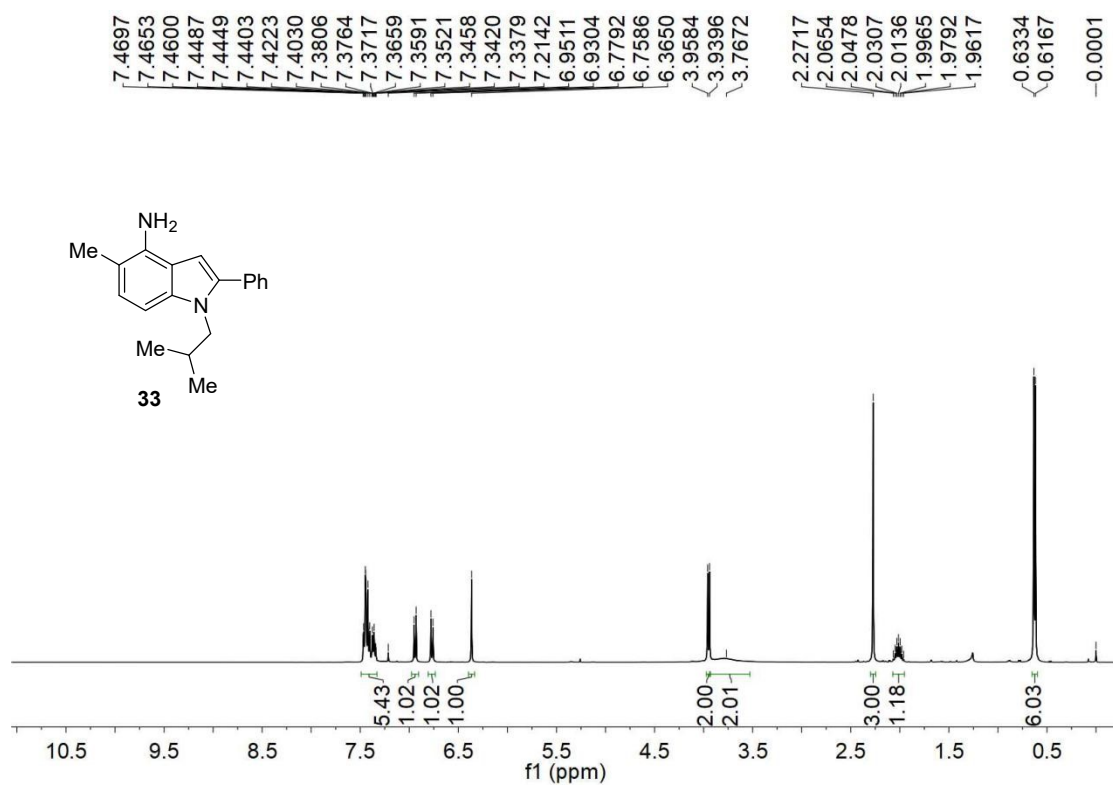

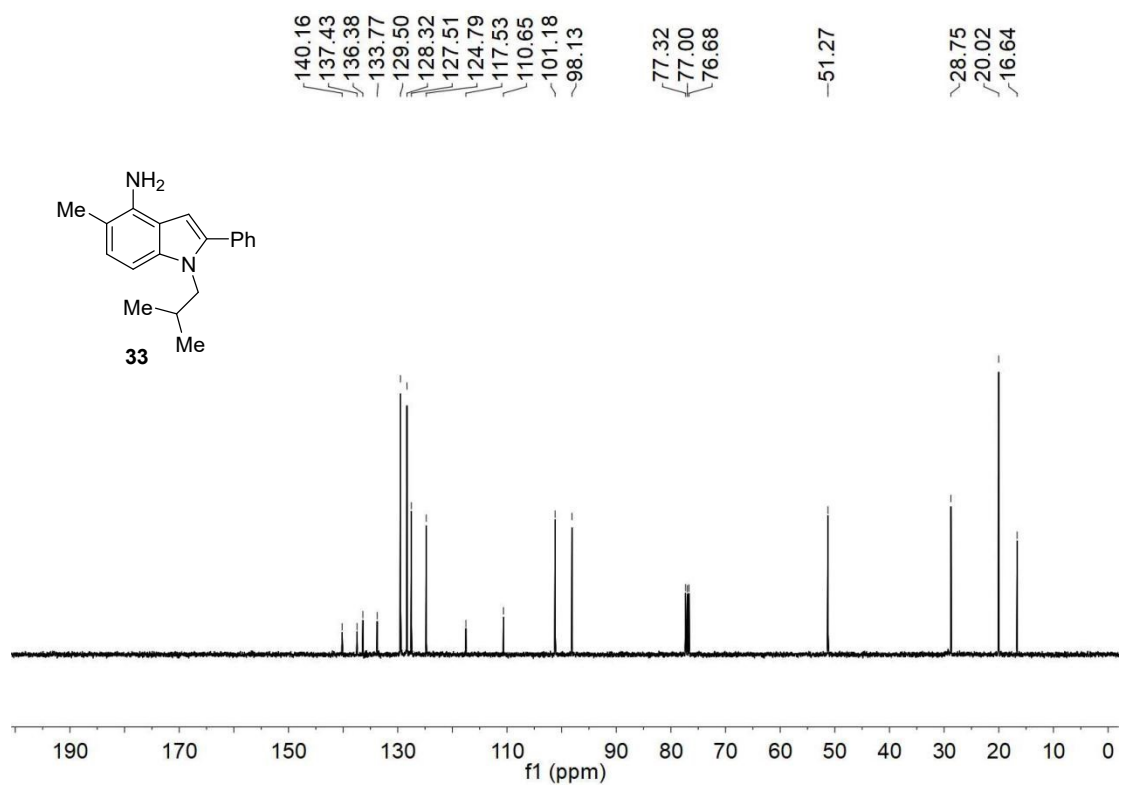

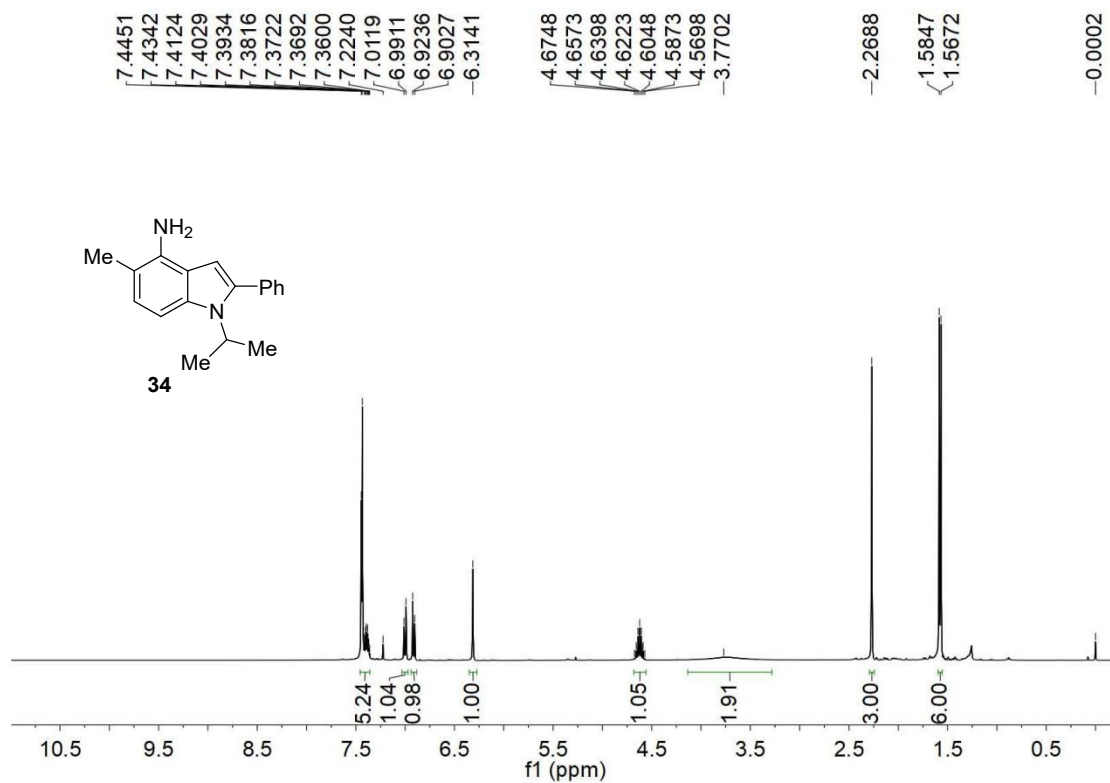

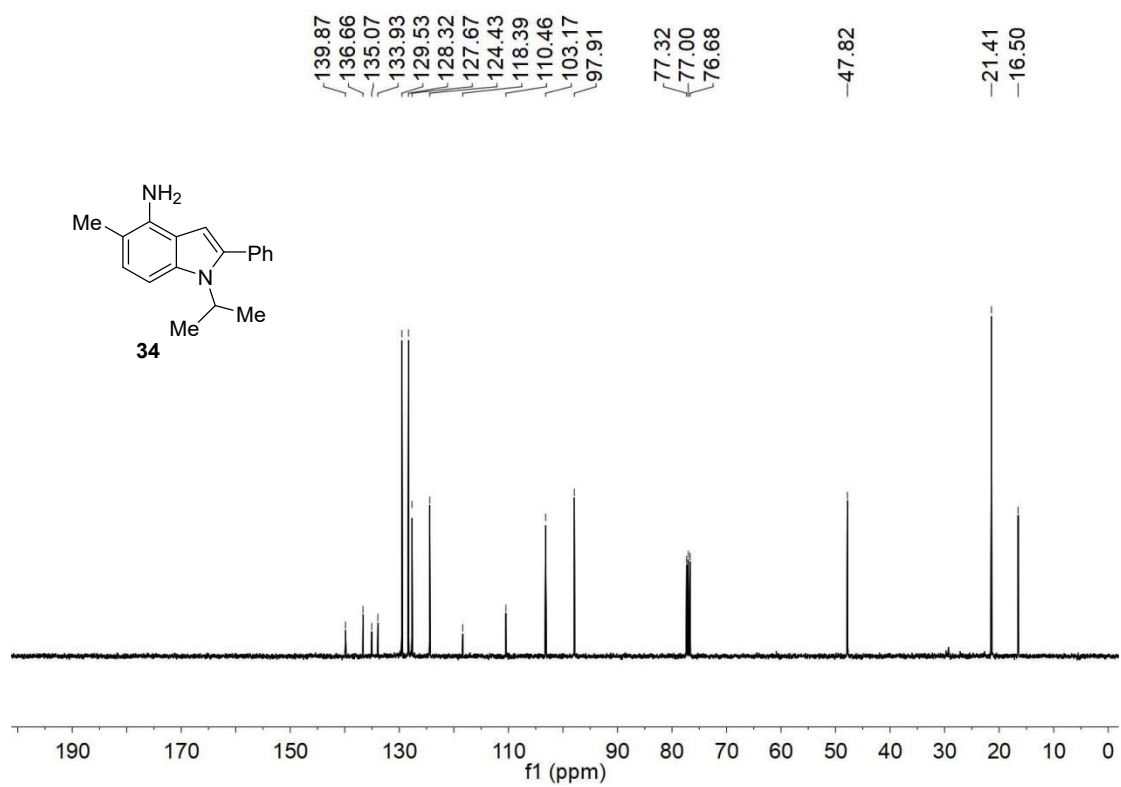

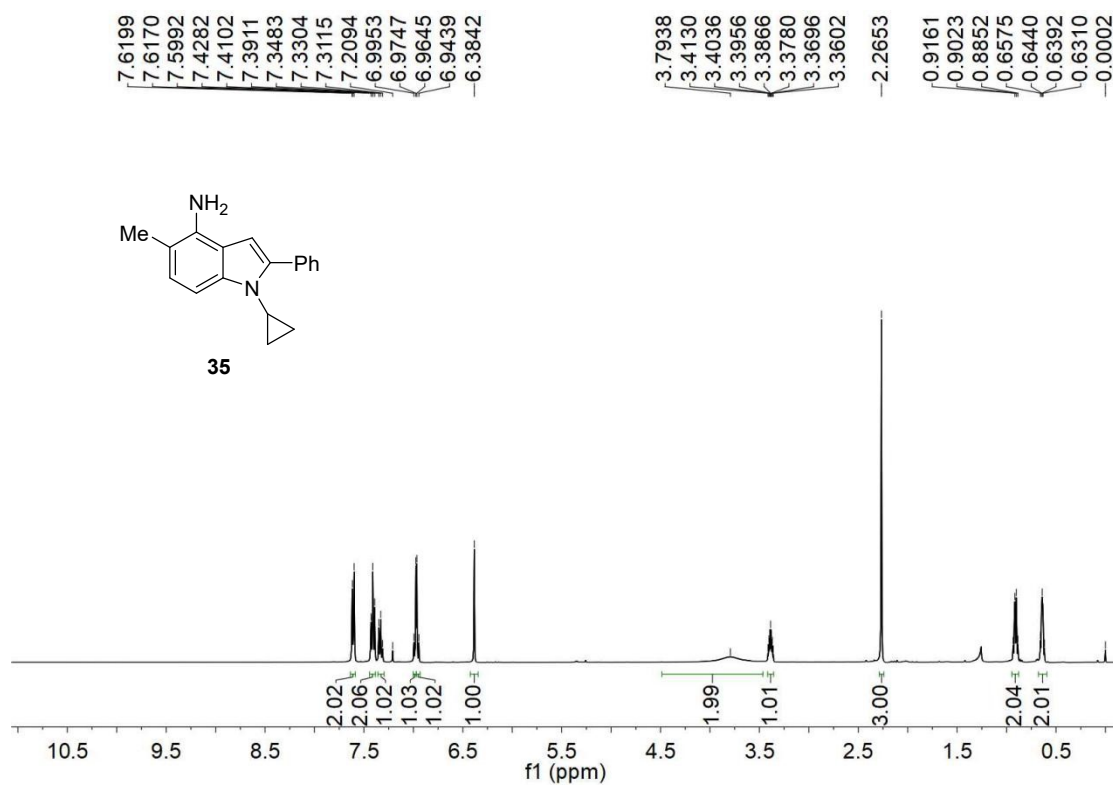

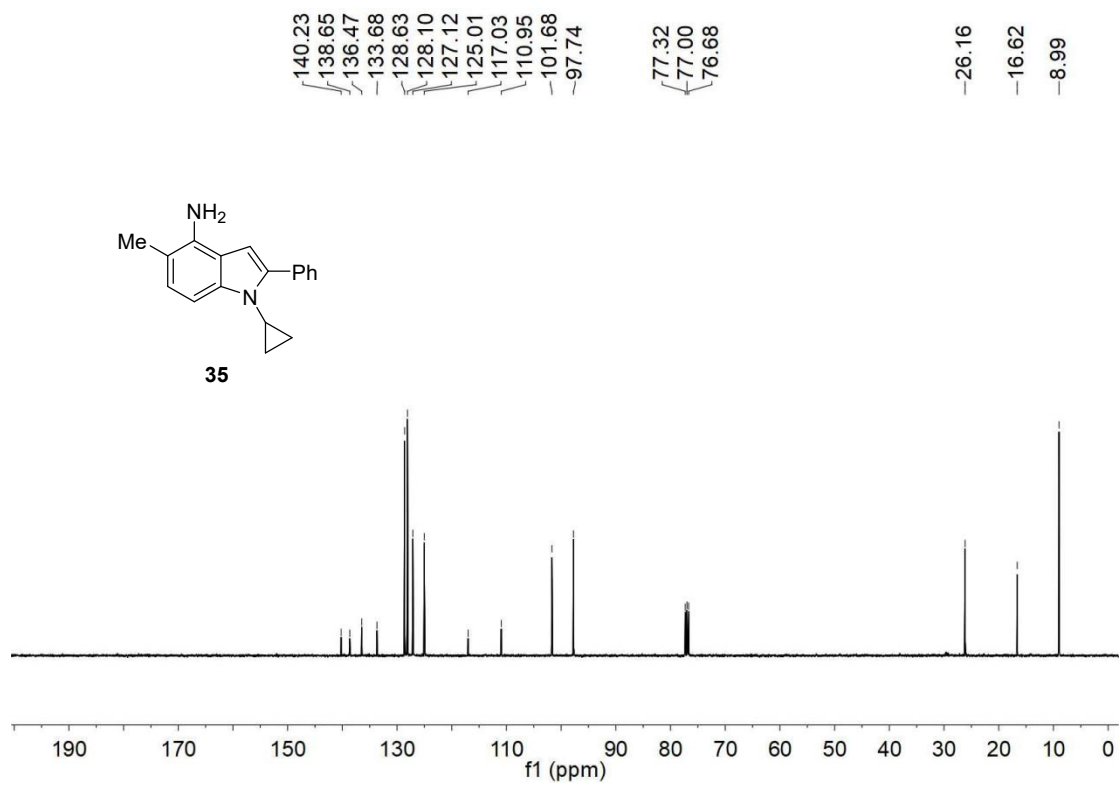



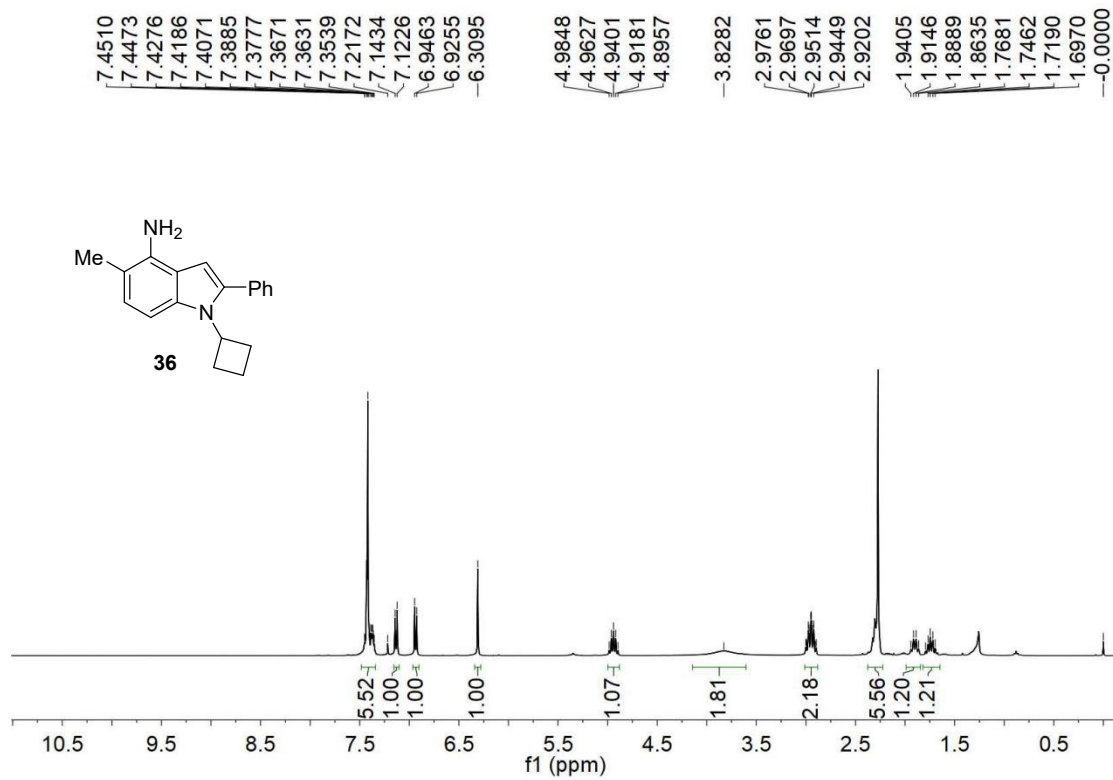

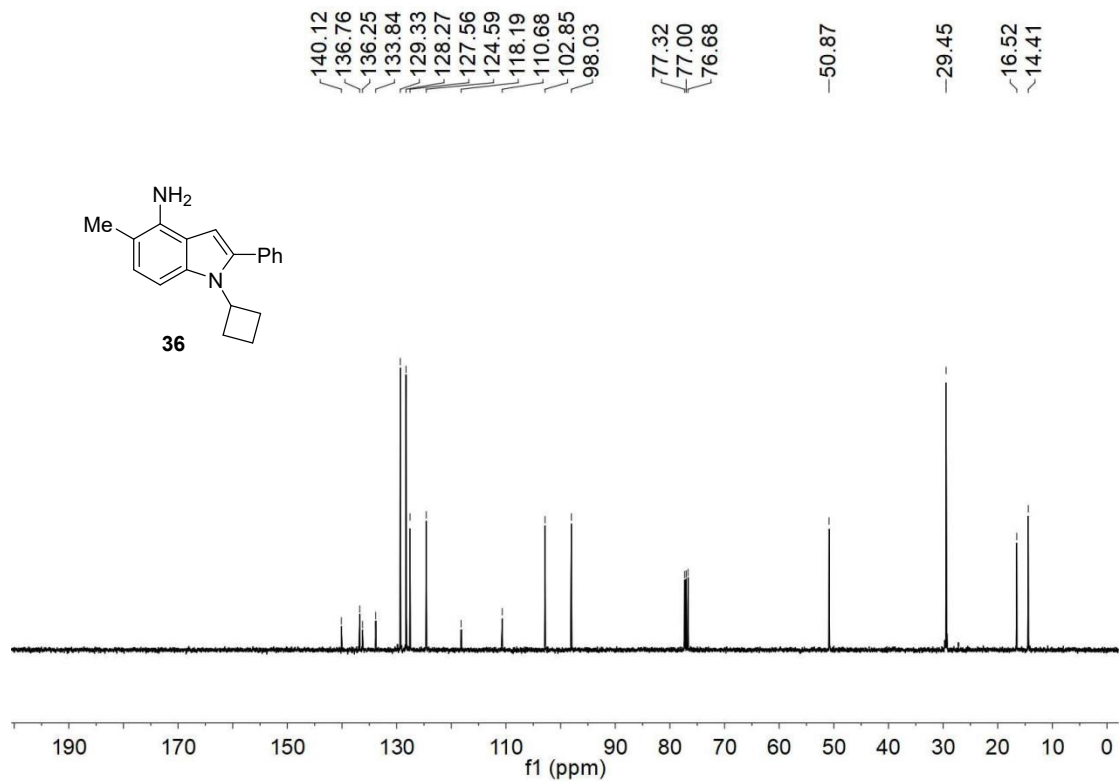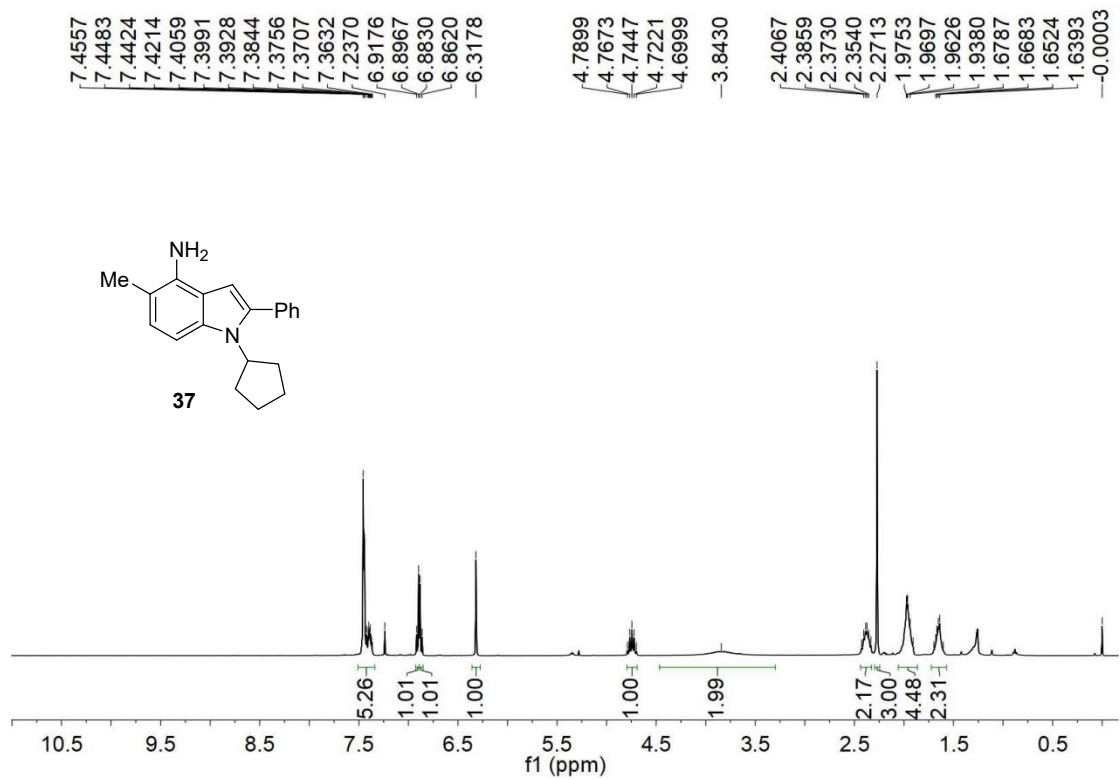

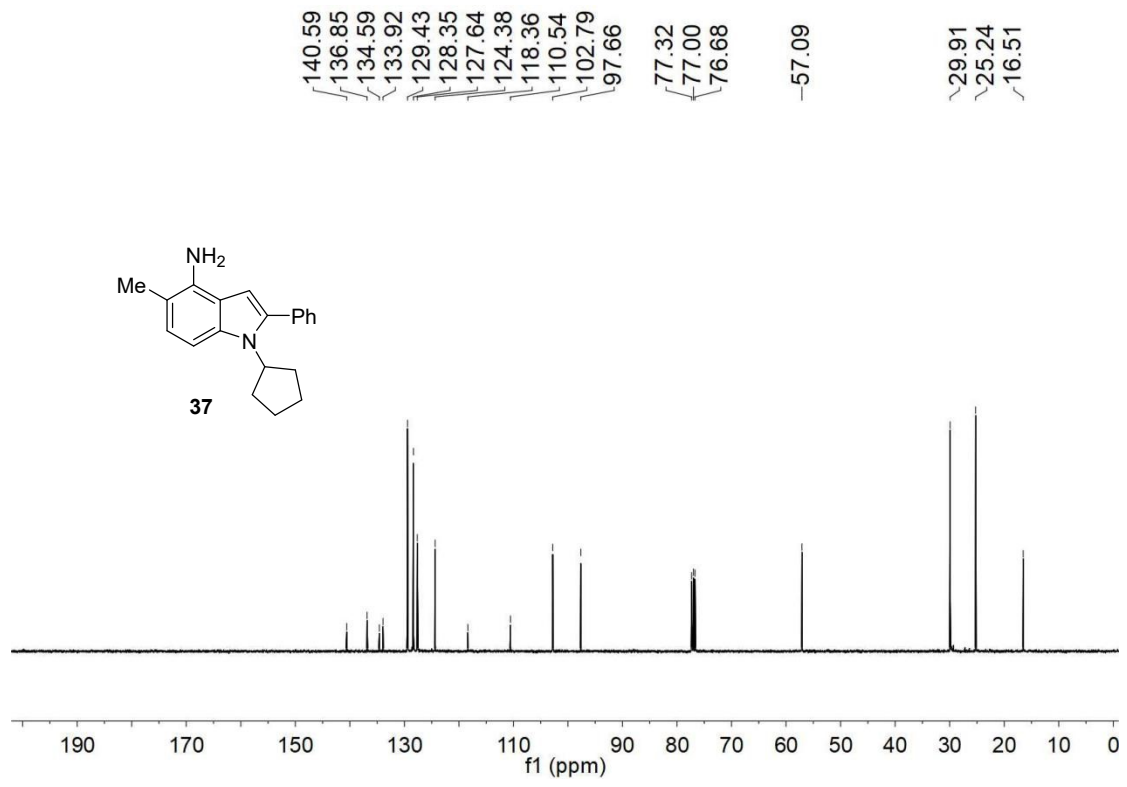

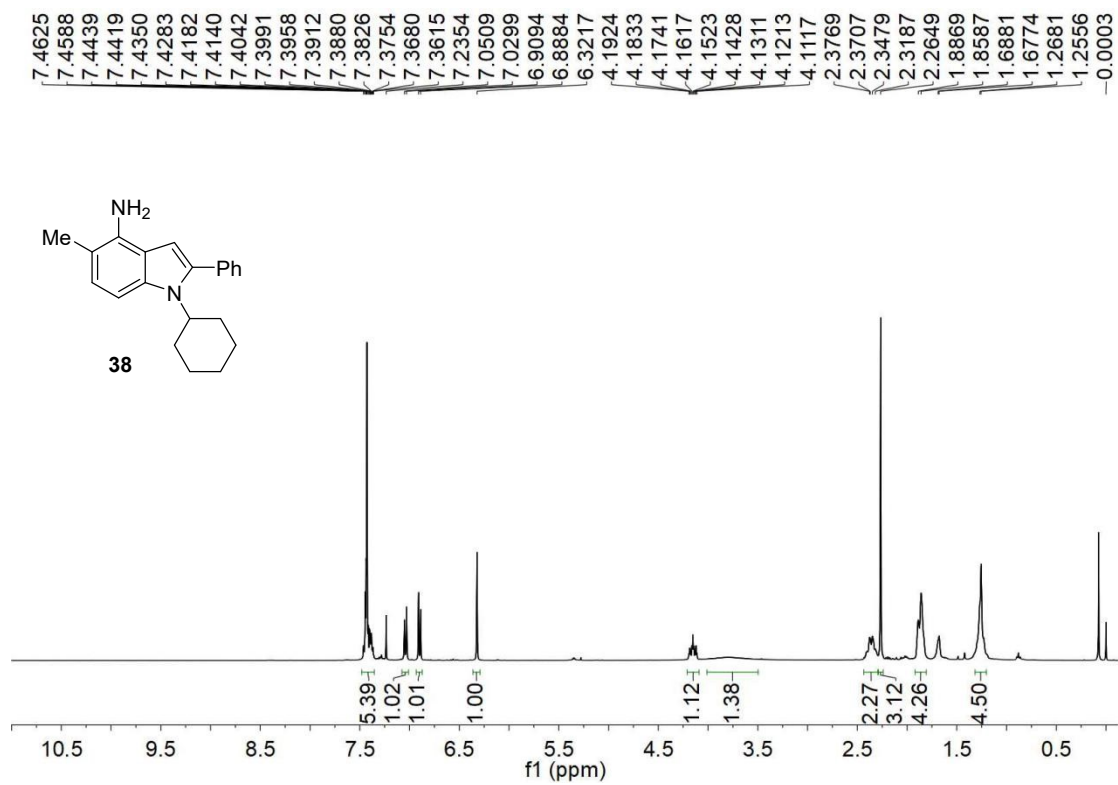

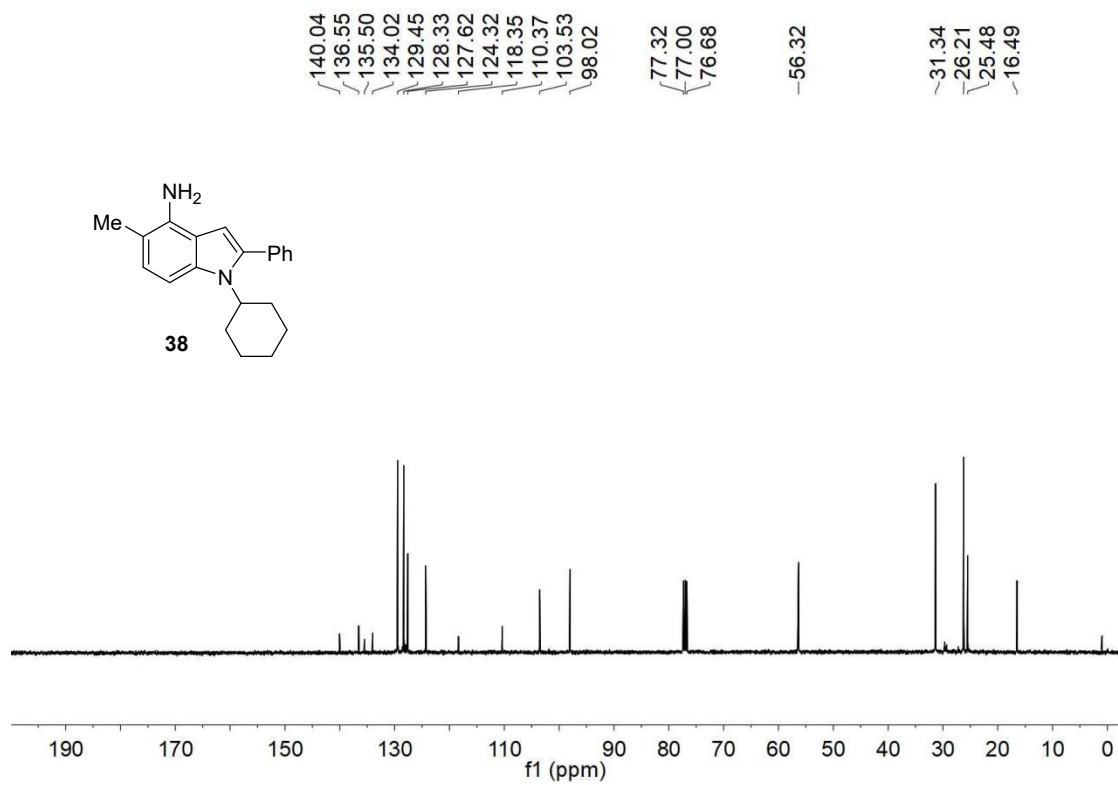

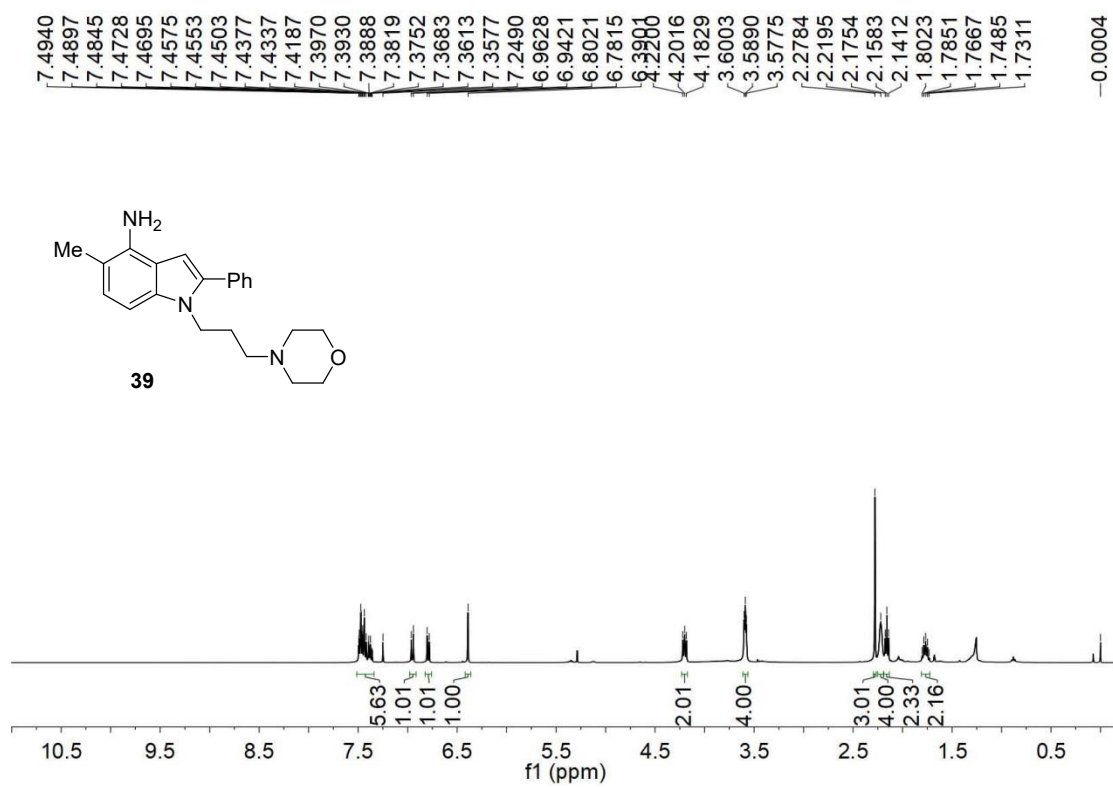

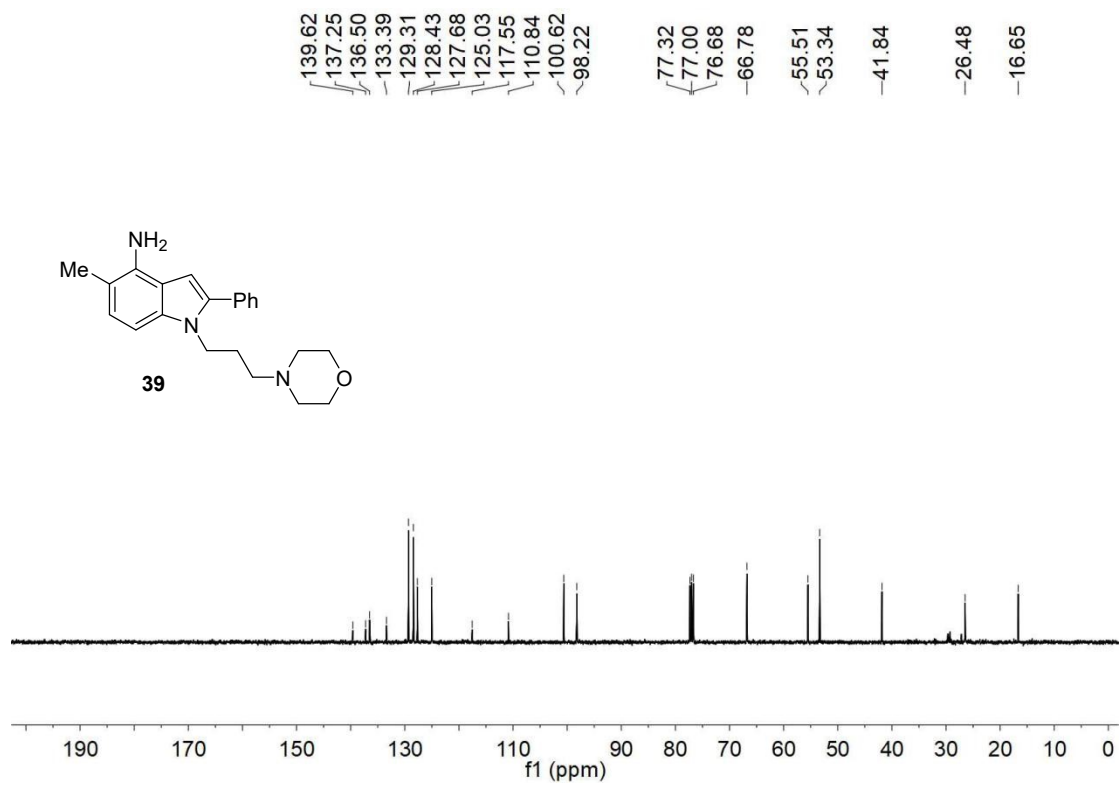

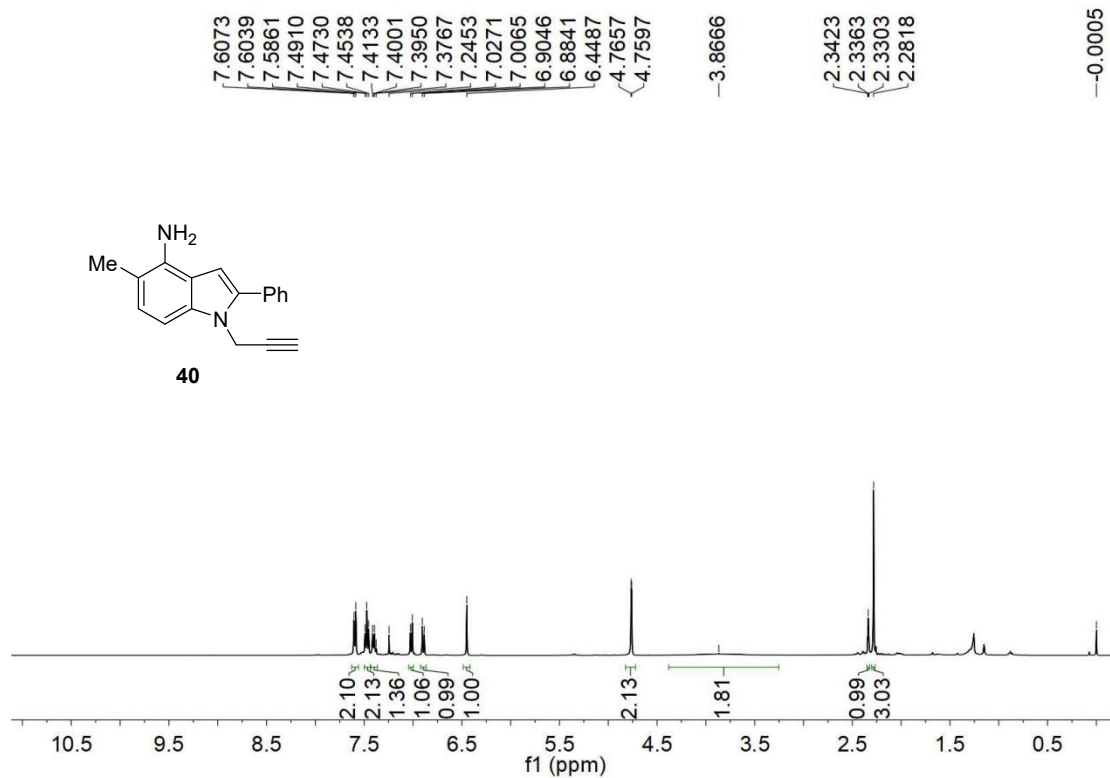



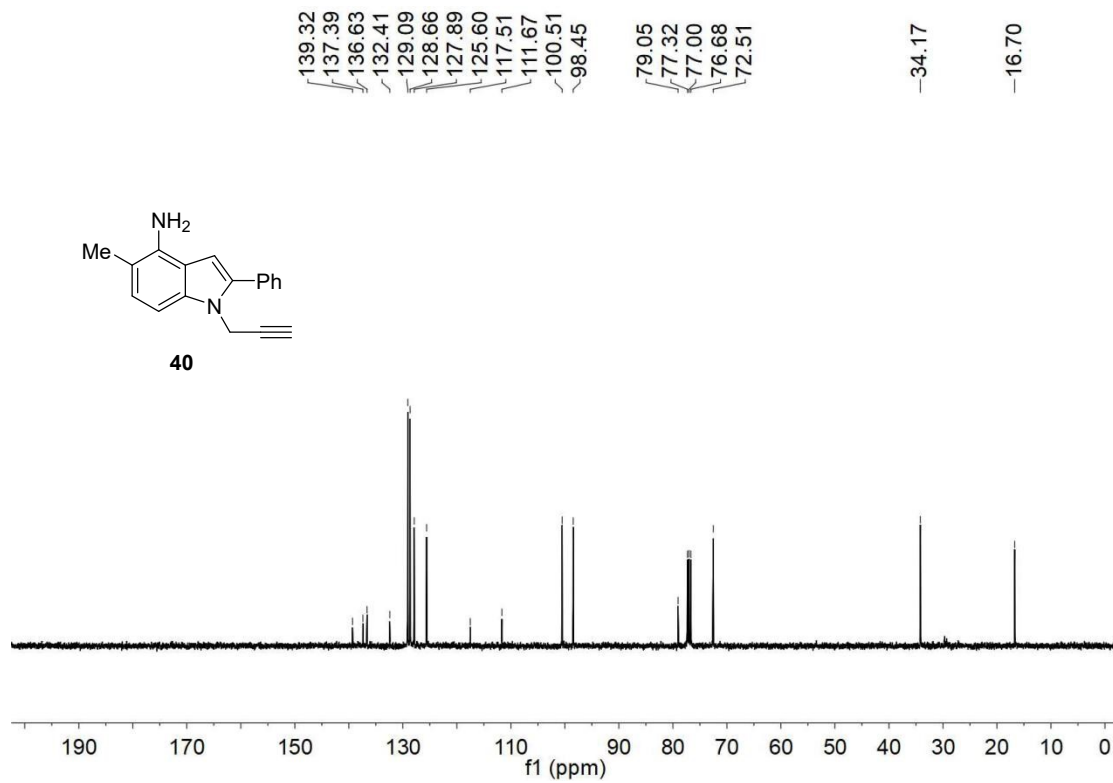

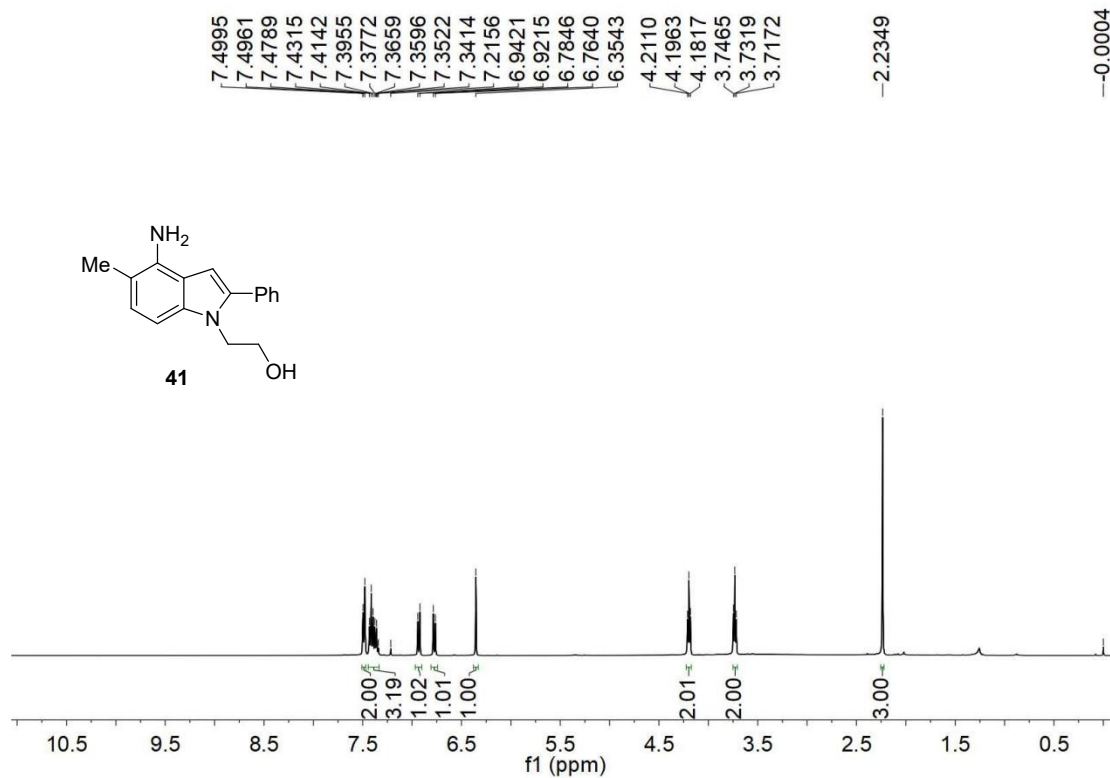

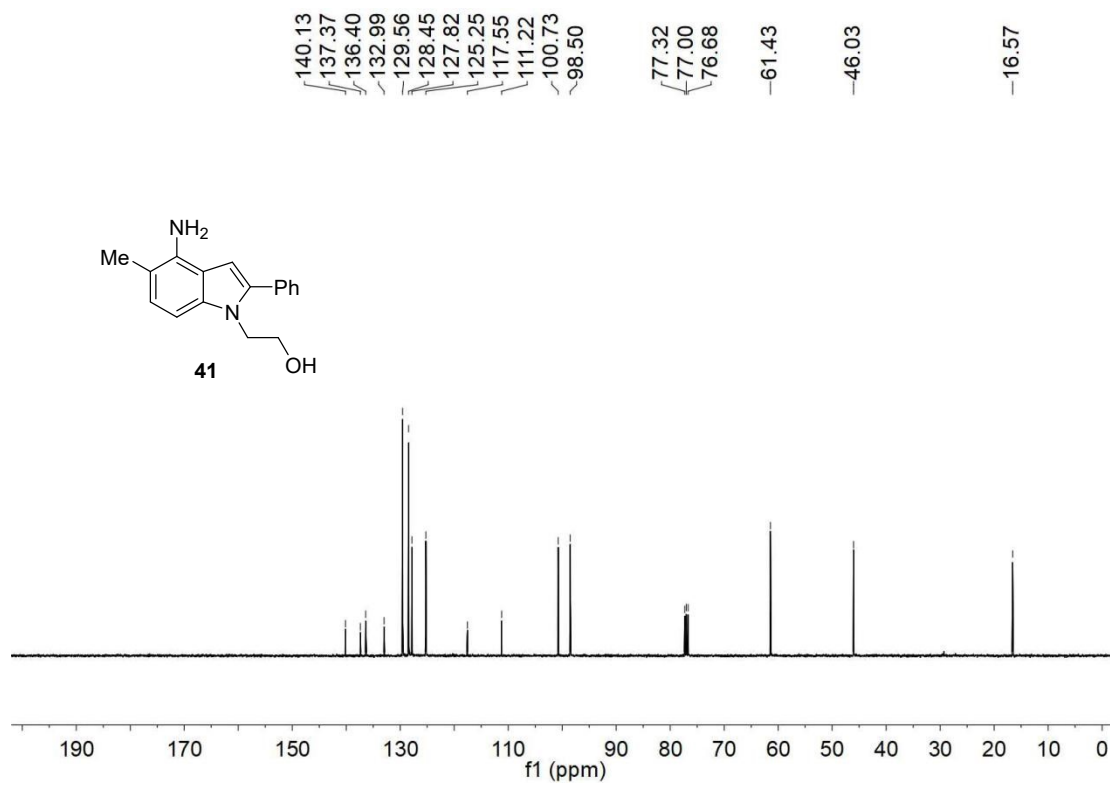

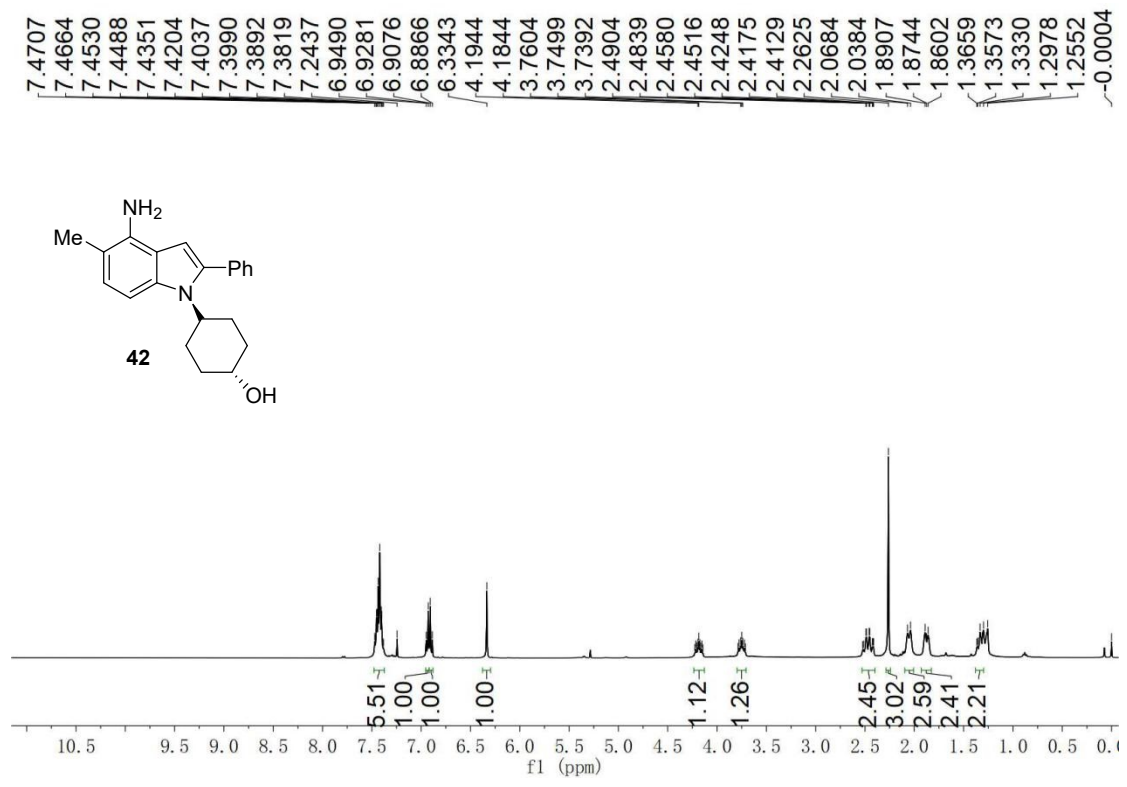

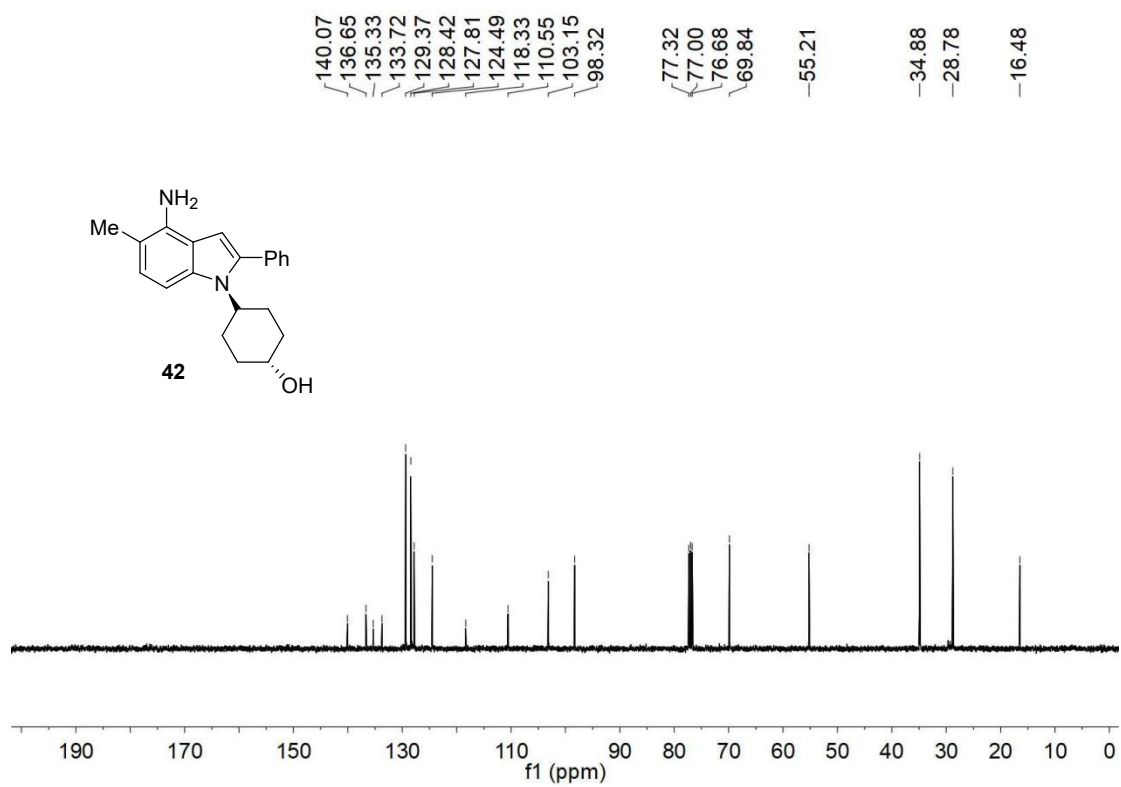

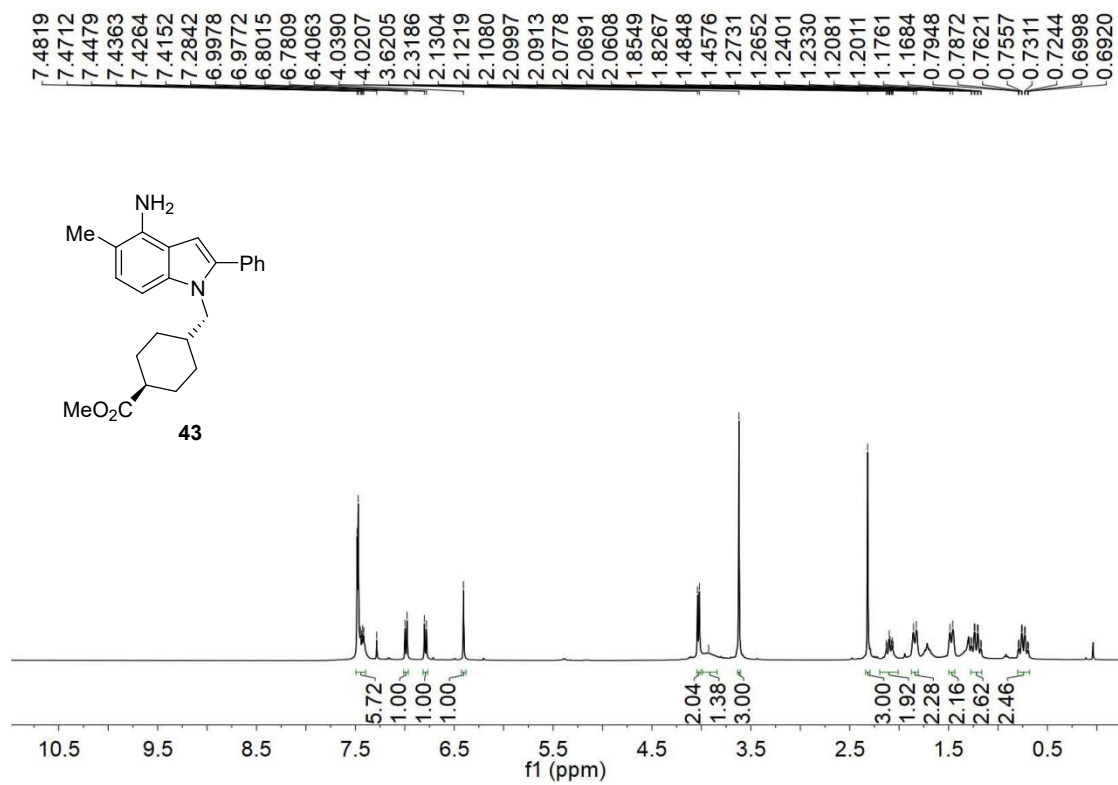

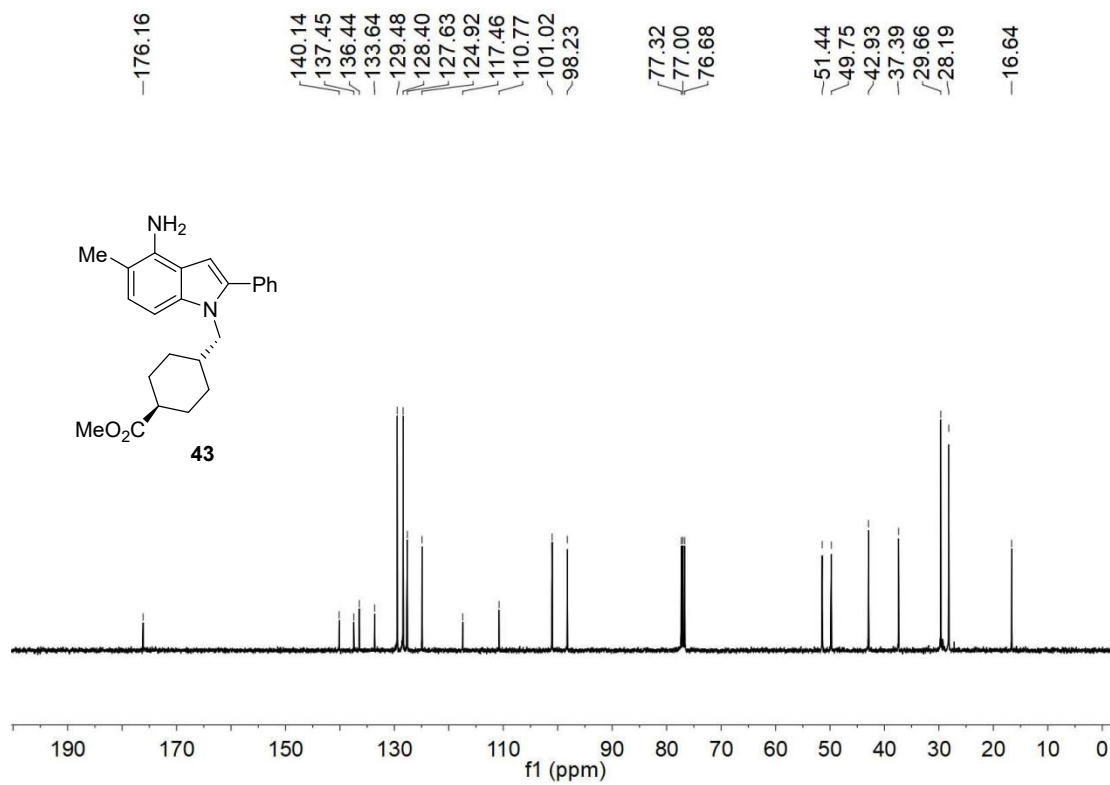

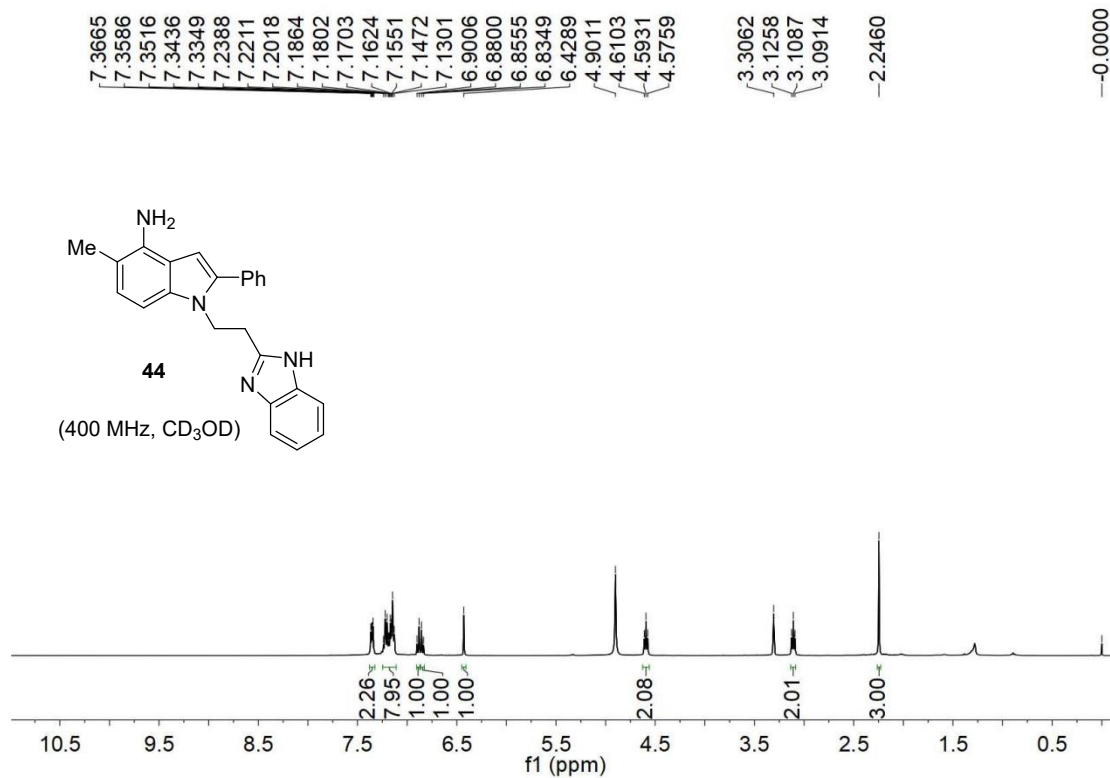



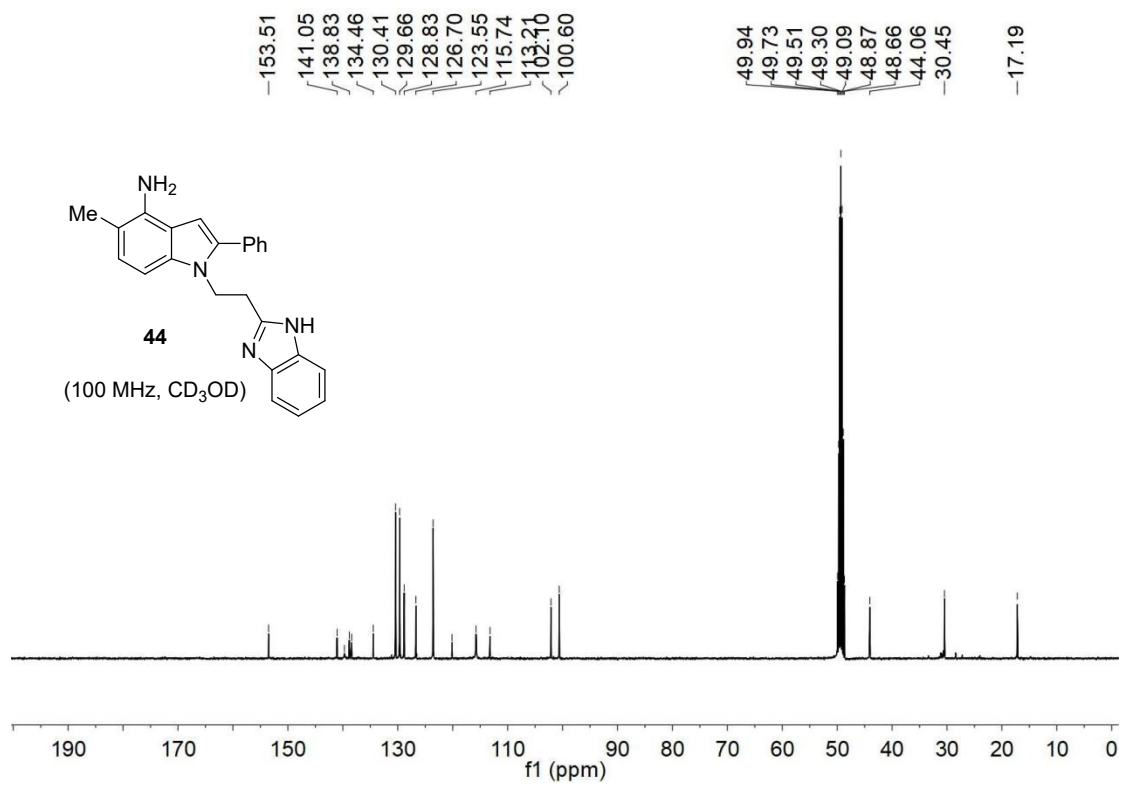

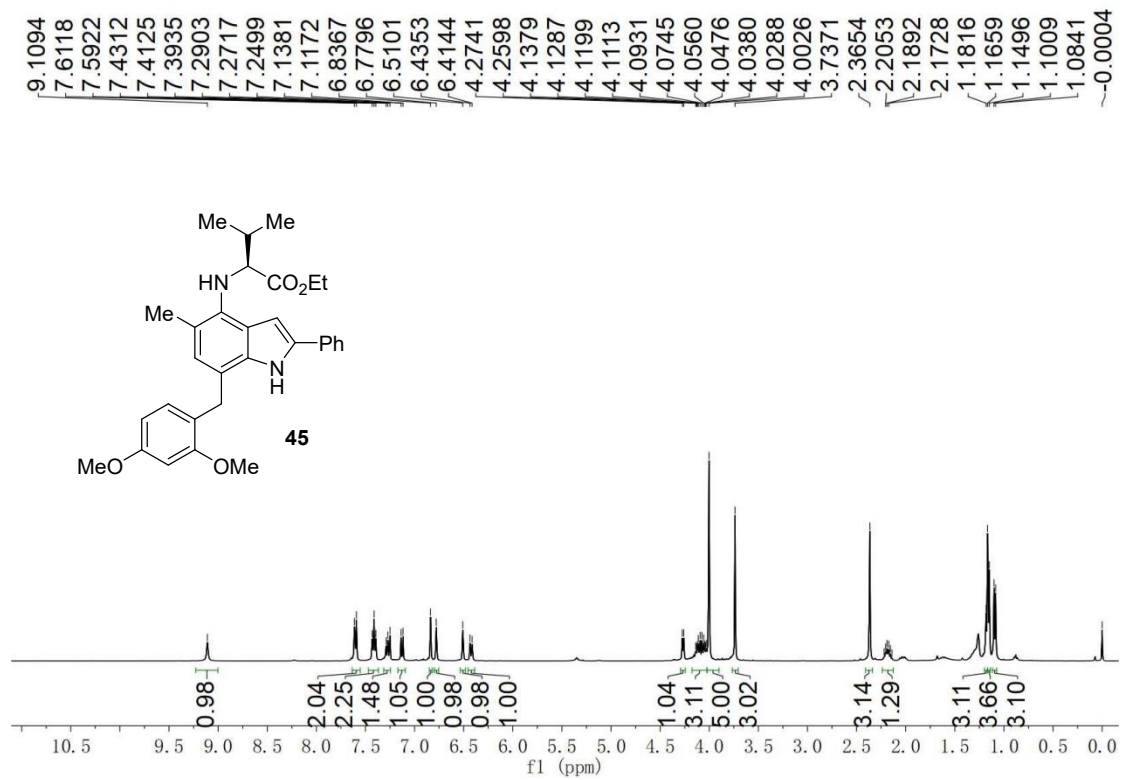

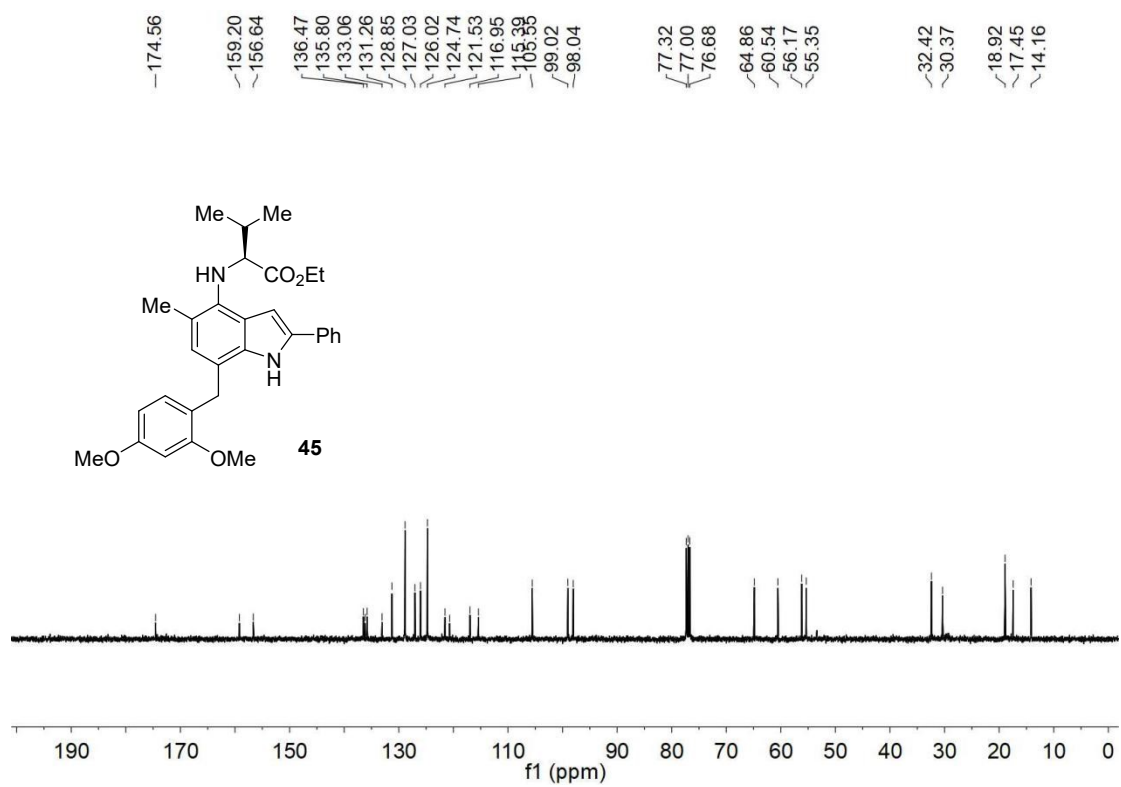

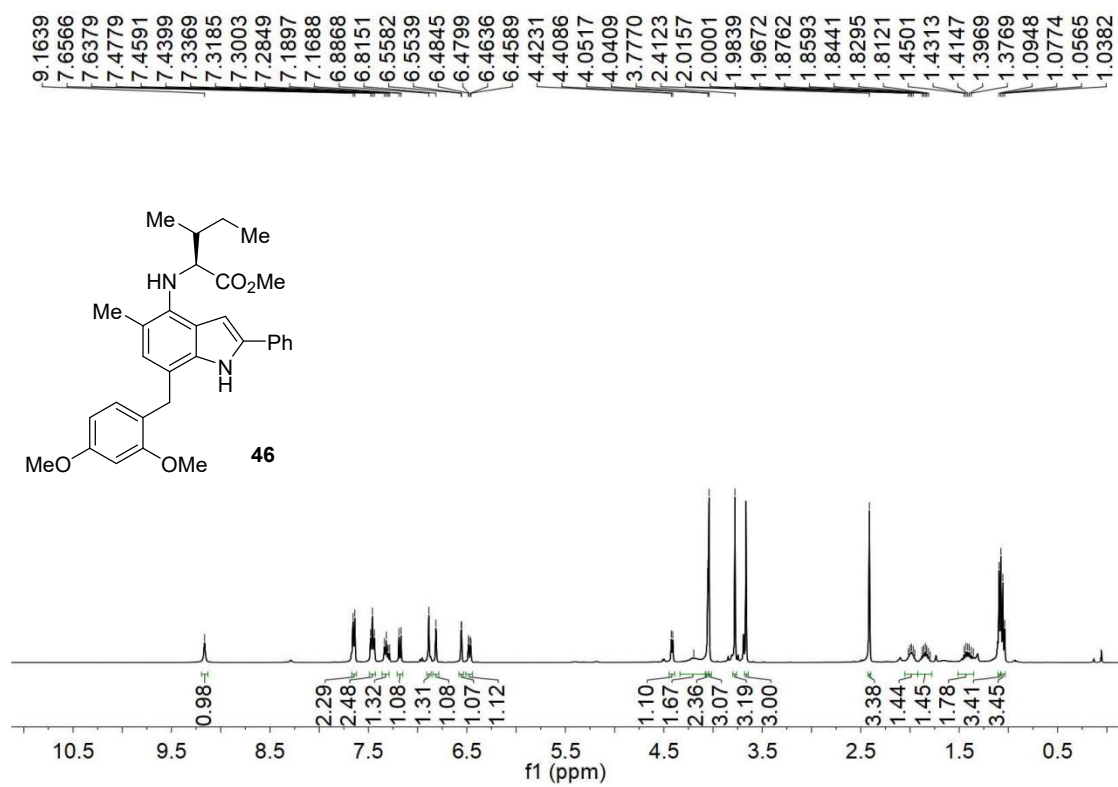

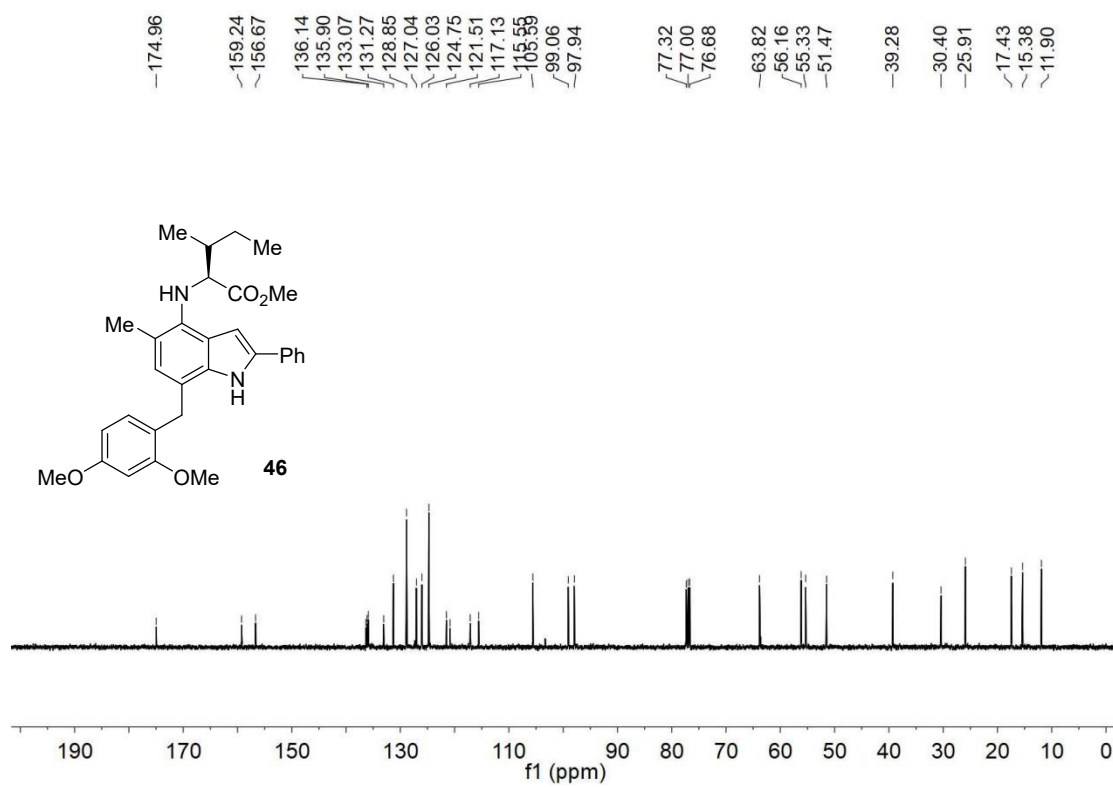

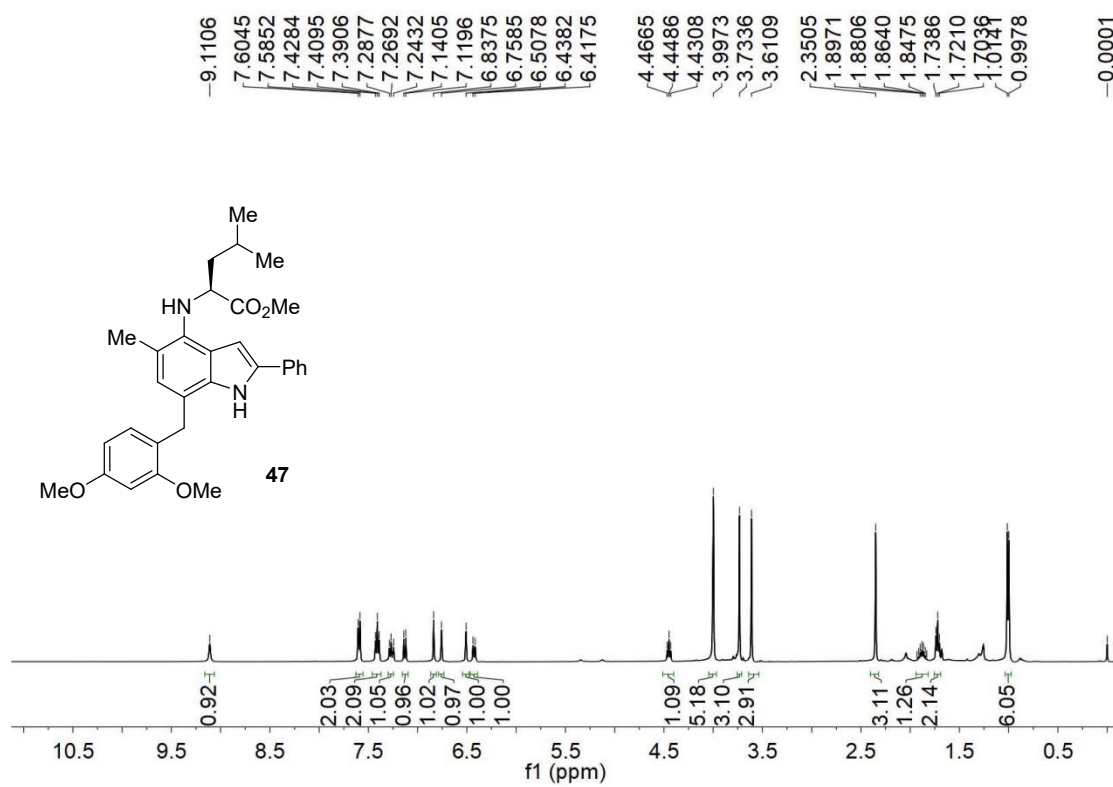

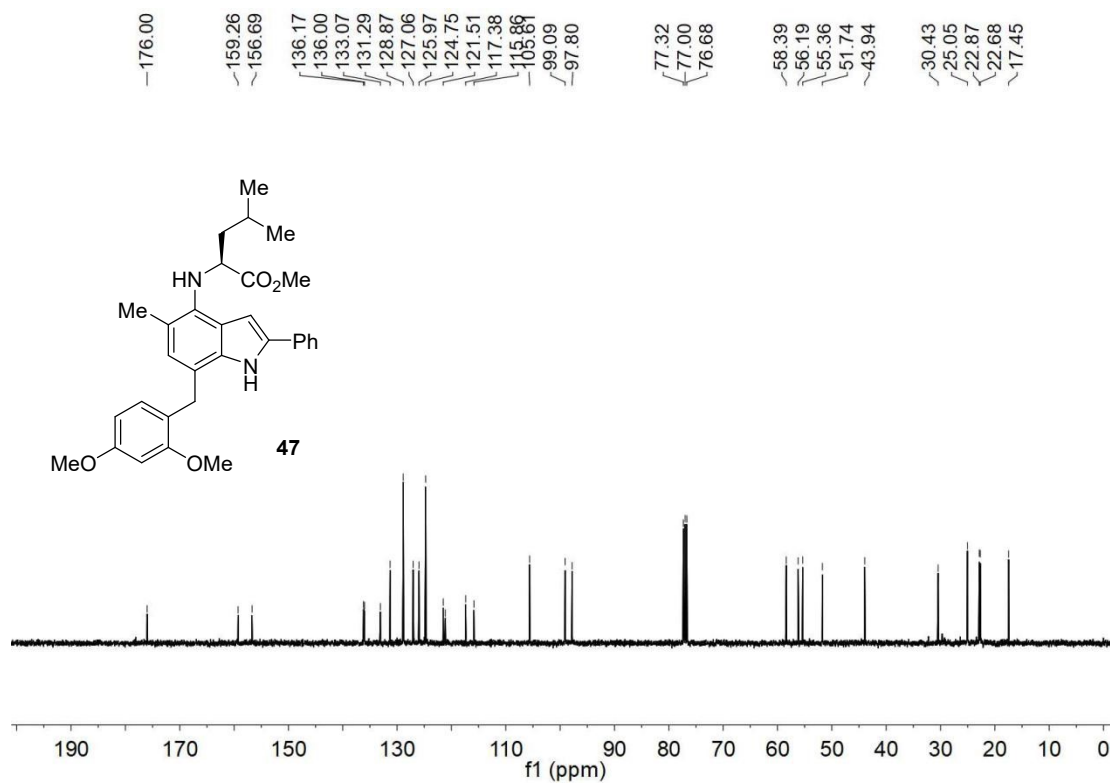

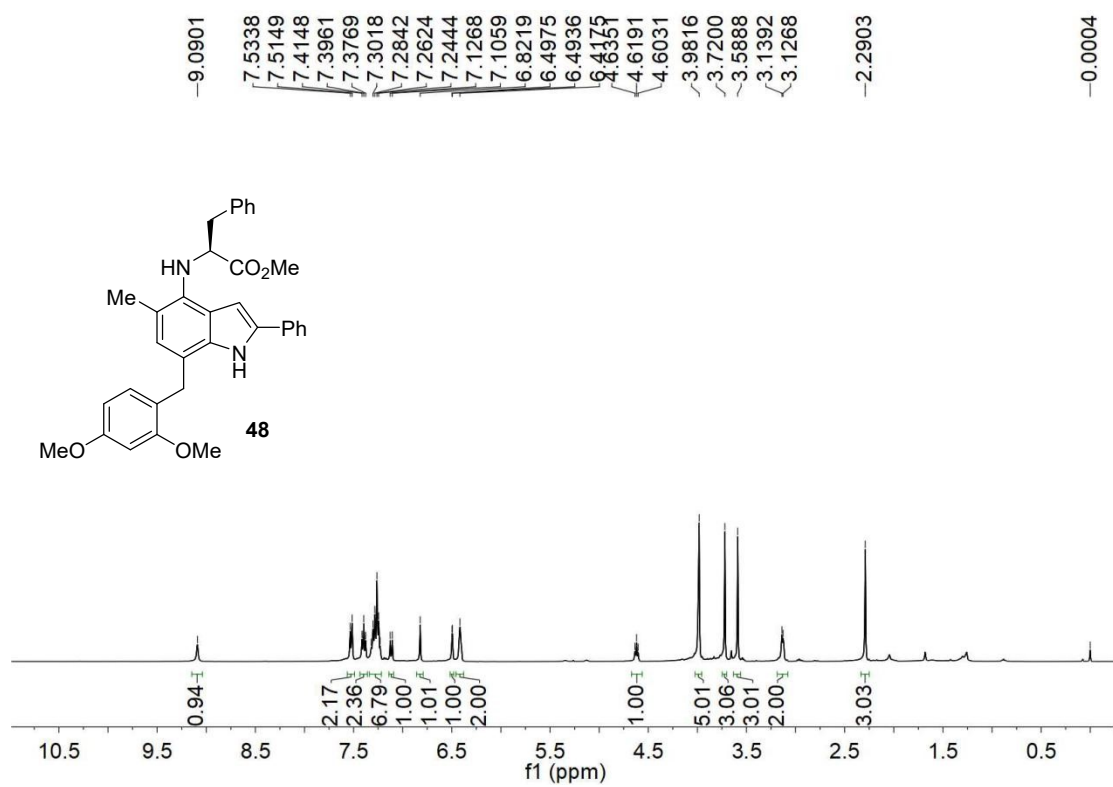



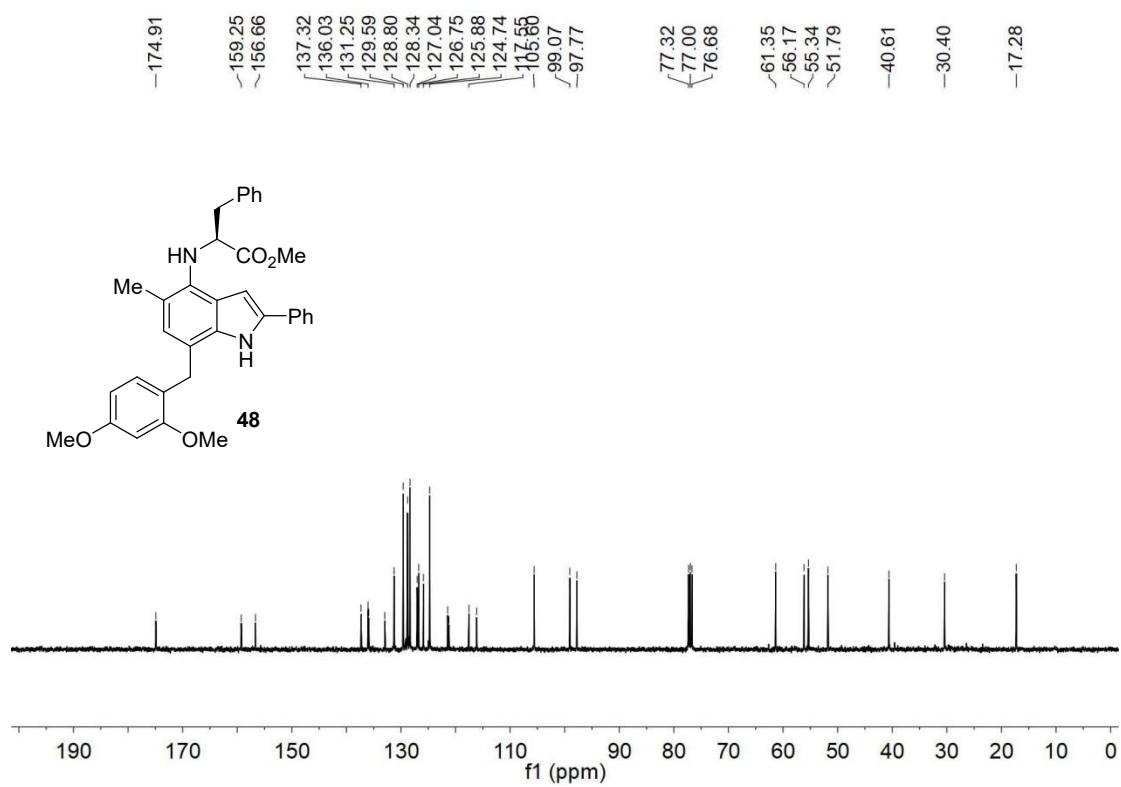

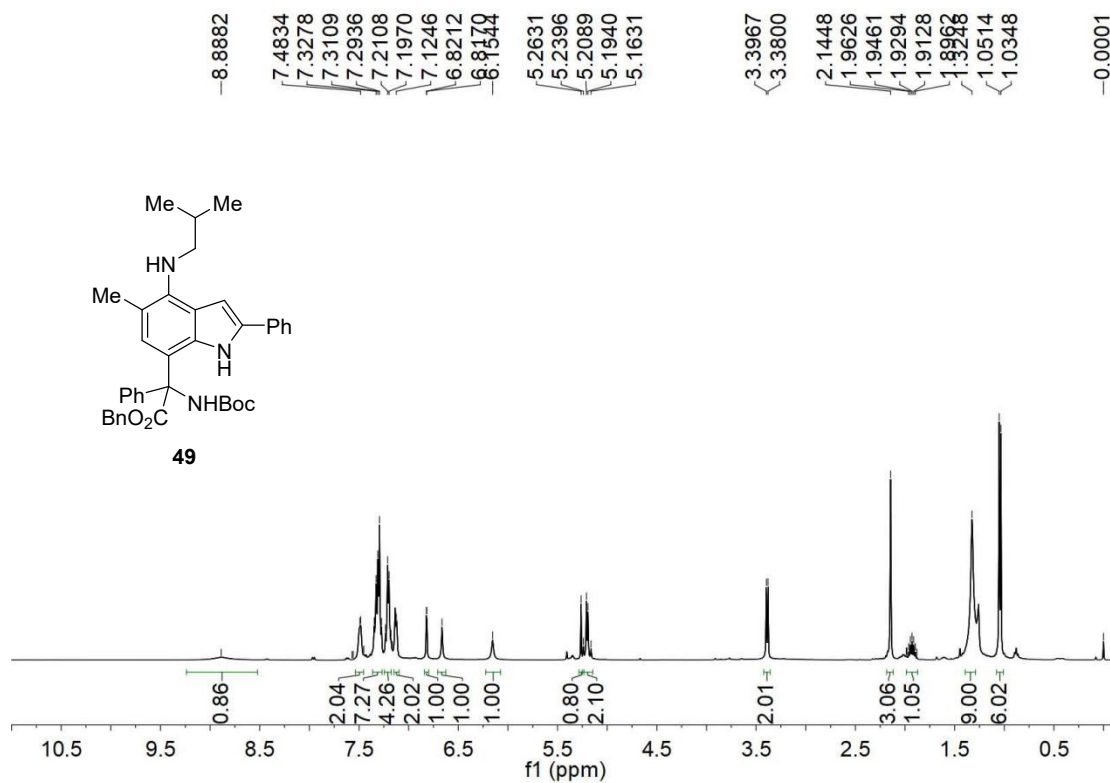

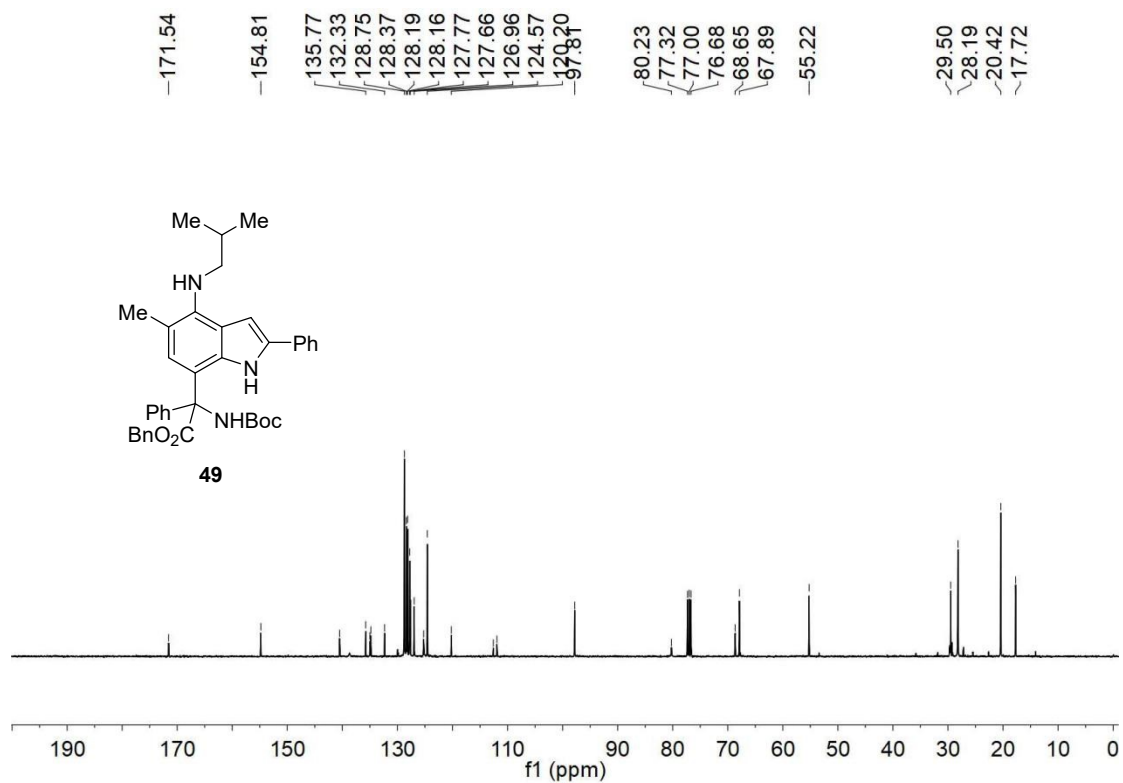

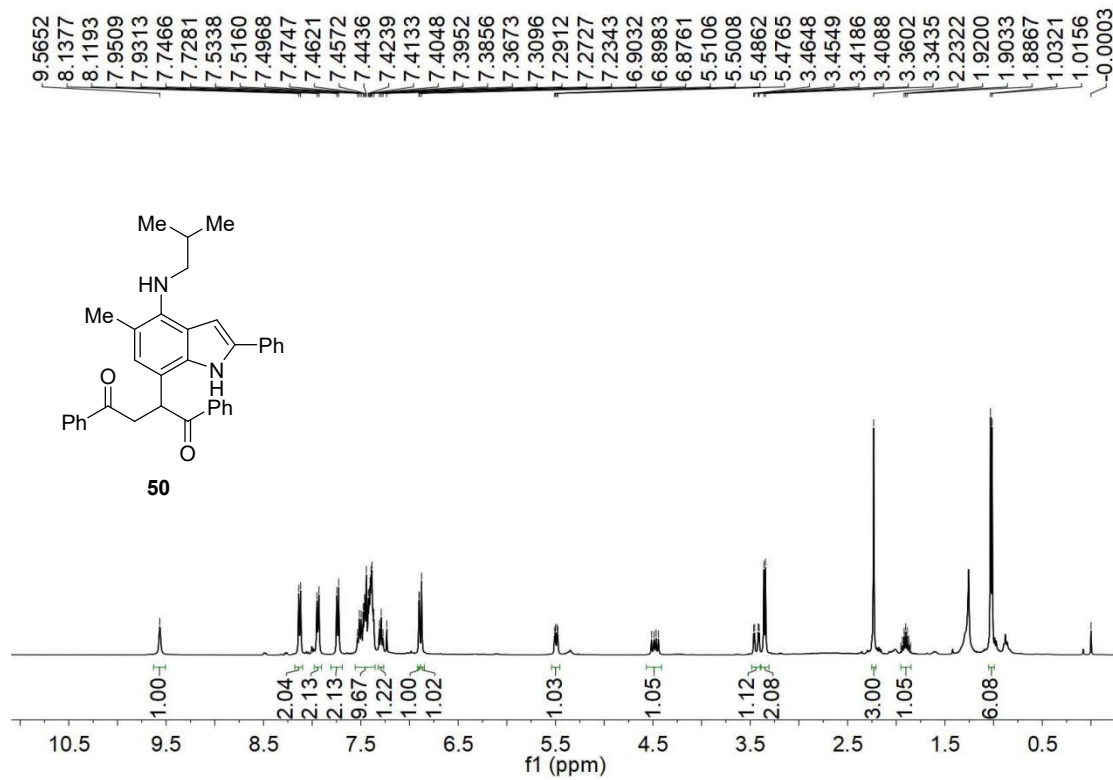

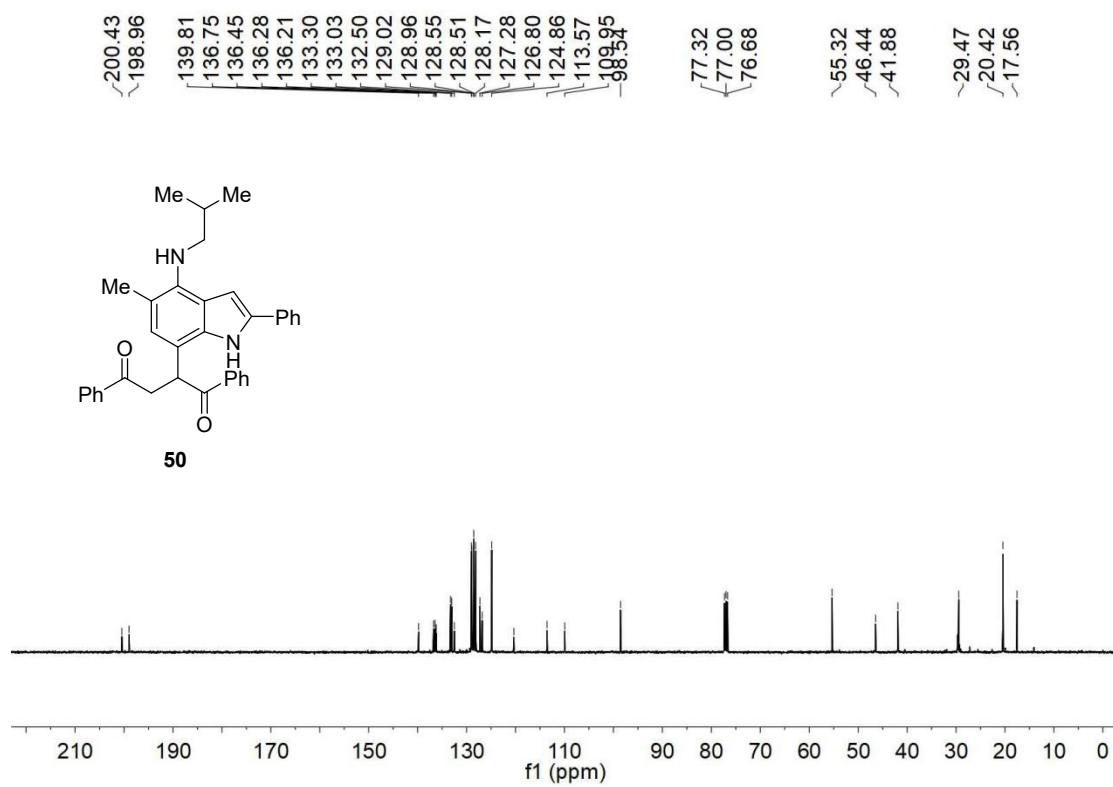

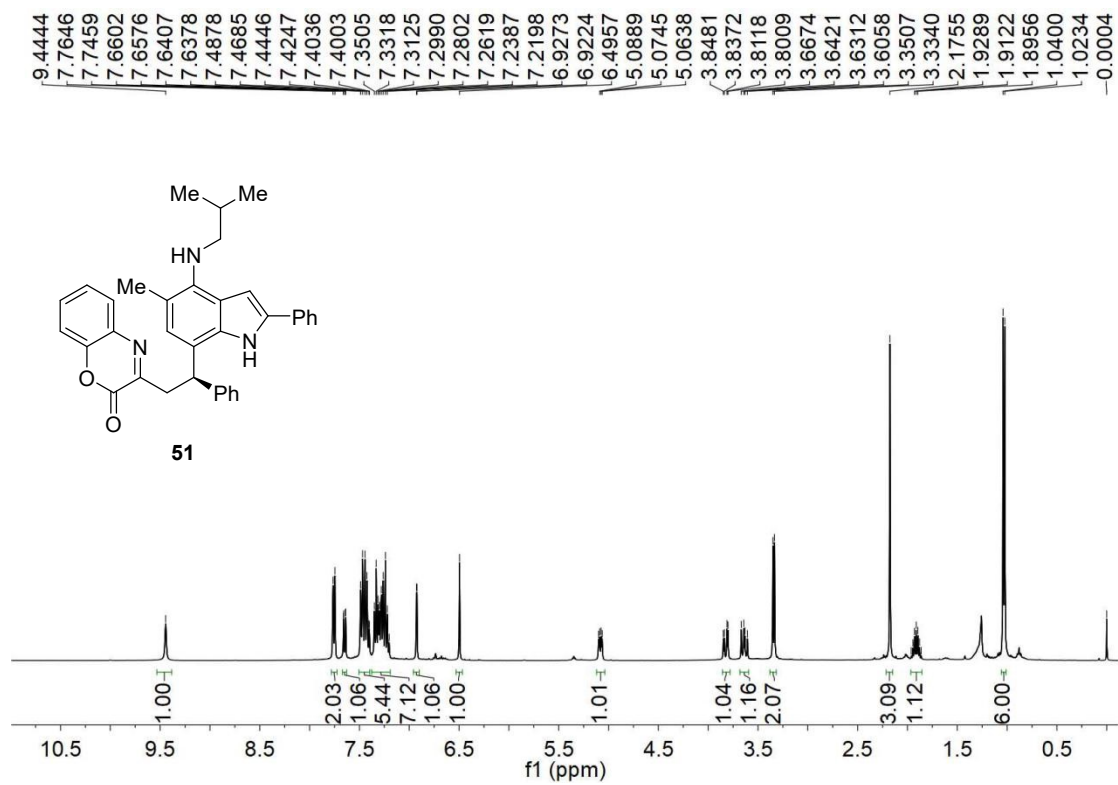

155.97  
146.17  
141.13  
138.78  
136.05  
132.71  
131.17  
130.79  
128.96  
128.93  
128.84  
128.52  
127.06  
126.75  
125.56  
124.74  
124.34  
119.81  
117.88  
116.30  
112.91  
98.74

77.32  
77.00  
76.68

55.61

43.45  
39.90

29.47  
20.48  
17.69

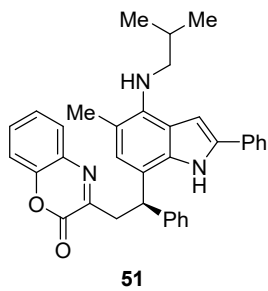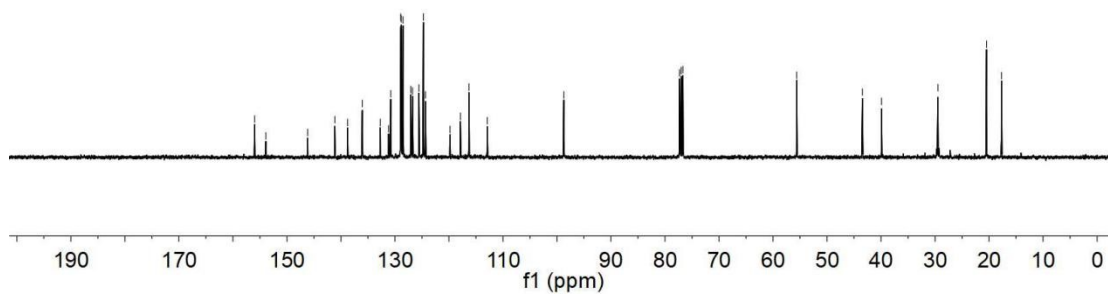

Method Description:

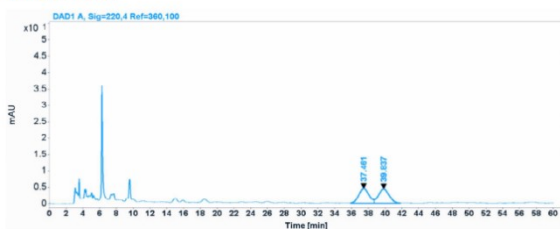

Method Description:

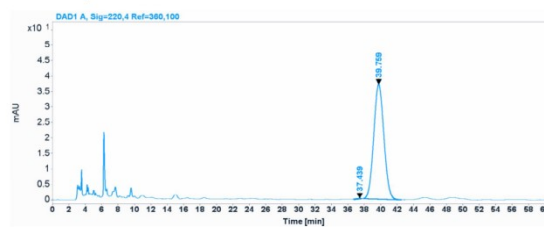

Signal: DAD1 A, Sig=220,4 Ref=360,100

| RT [min] | Width [min] | Area [mAU*S] | Height [mAU] | Area%   |
|----------|-------------|--------------|--------------|---------|
| 37.461   | 1.417       | 376.167      | 4.425        | 49.6489 |
| 39.837   | 1.475       | 381.487      | 4.311        | 50.3511 |
|          | Sum         | 757.6540     |              |         |

Signal: DAD1 A, Sig=220,4 Ref=360,100

| RT [min] | Width [min] | Area [mAU*S] | Height [mAU] | Area%   |
|----------|-------------|--------------|--------------|---------|
| 37.439   | 0.837       | 8.395        | 0.167        | 0.2630  |
| 39.759   | 1.432       | 3184.358     | 37.066       | 99.7370 |
|          | Sum         | 3192.7535    |              |         |



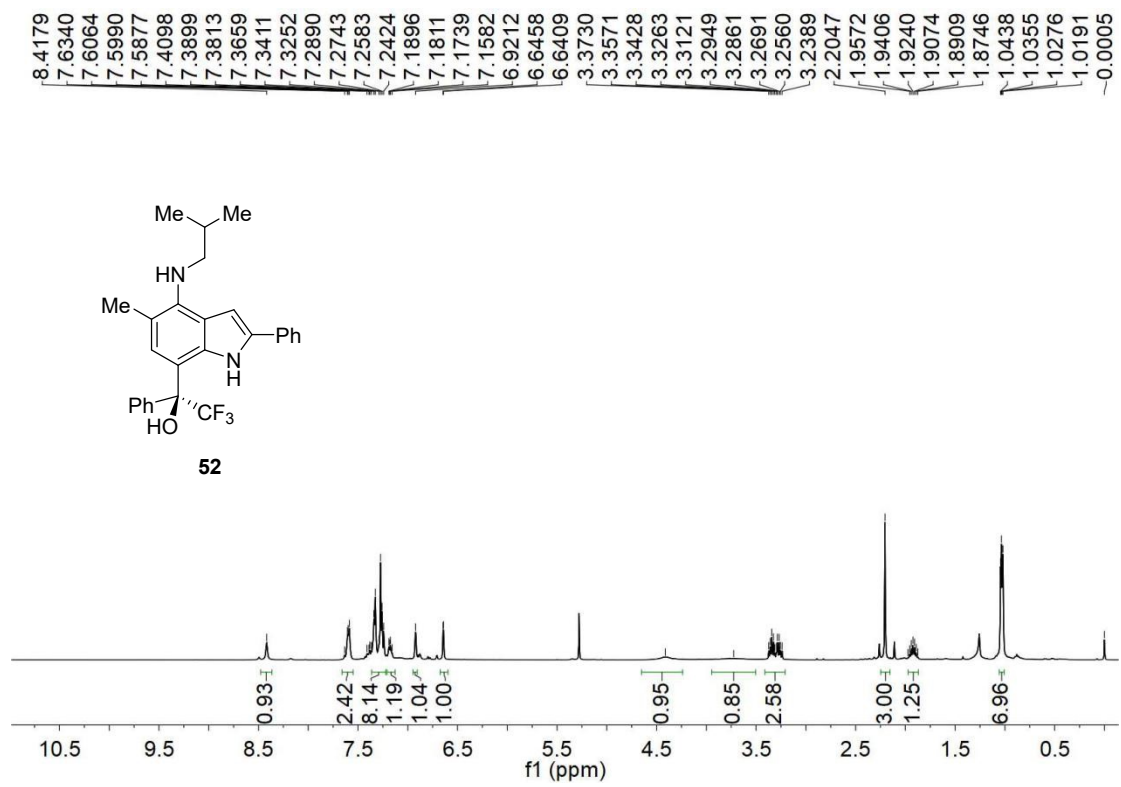

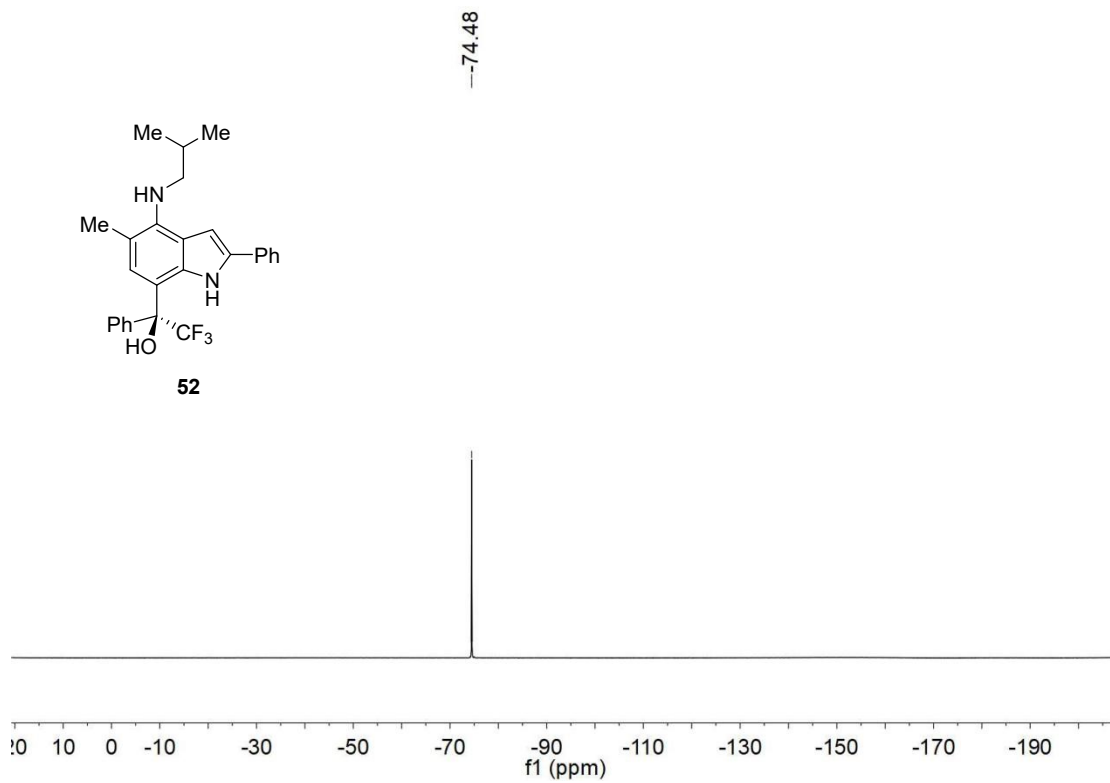

140.01  
138.67  
135.59  
135.34  
132.13  
128.92  
128.88  
128.75  
128.69  
128.19  
127.49  
127.21  
127.08  
124.83  
124.64  
124.47  
124.20  
120.24  
112.44  
111.93  
-97.61  
80.19  
79.91  
79.72  
79.62  
77.32  
77.00  
76.68  
-55.45  
29.30  
20.45  
17.68

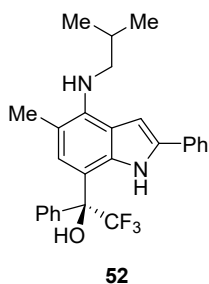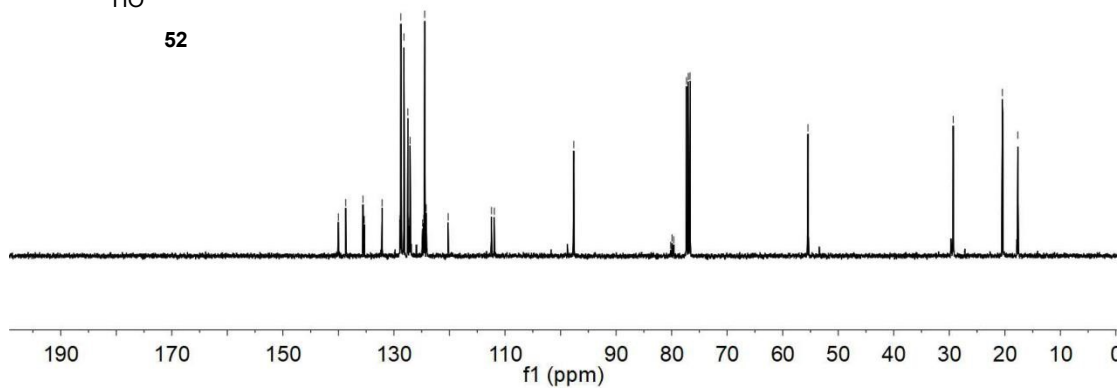

Method Description:

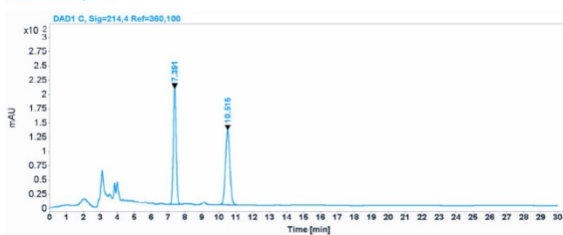

Method Description:

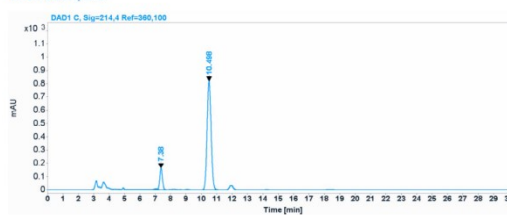

Signal: DAD1 C, Sig=214,4 Ref=360,100

| RT [min] | Width [min] | Area [mAU*S] | Height [mAU] | Area%   |
|----------|-------------|--------------|--------------|---------|
| 7.391    | 0.180       | 2361.089     | 203.157      | 50.1865 |
| 10.515   | 0.279       | 2343.540     | 130.931      | 49.8135 |
|          | Sum         | 4704.6292    |              |         |

Signal: DAD1 C, Sig=214,4 Ref=360,100

| RT [min] | Width [min] | Area [mAU*S] | Height [mAU] | Area%   |
|----------|-------------|--------------|--------------|---------|
| 7.380    | 0.183       | 1993.488     | 162.397      | 11.8143 |
| 10.498   | 0.285       | 14879.990    | 816.560      | 88.1857 |
|          | Sum         | 16873.4778   |              |         |
